# Supplementary material
Source: publisher figshare collection journal article supplement (https://gsajournals.figshare.com/articles/dataset/_/9916223)
Supplement: Supplementary file [file 1]

Table S1

1

| Gal4    | UAS      | Stage | UAS |      |      | Gal4 |      |     | Gal4 + UAS |             |      | P      |         | Change |
|---------|----------|-------|-----|------|------|------|------|-----|------------|-------------|------|--------|---------|--------|
|         |          |       | N   | Mean | STD  | N    | Mean | STD | N          | Mean        | STD  | vs UAS | vs Gal4 |        |
| da-GAL4 | 2.1      | L1    | 8   | 98.0 | 2.1  | 8    | 97.0 | 2.8 | 8          | 93.0        | 4.7  | 0.0154 | 0.0568  |        |
|         |          | Pupa  | 8   | 82.6 | 8.9  | 8    | 93.9 | 3.8 | 8          | 78.7        | 14.0 | 0.5202 | 0.0105  |        |
|         |          | Adult | 8   | 98.6 | 2.5  | 8    | 98.9 | 3.1 | 8          | 99.3        | 1.9  | 0.5372 | 0.7406  |        |
| da-GAL4 | 4.3      | L1    | 8   | 94.5 | 3.7  | 8    | 97.0 | 2.8 | 8          | 96.0        | 4.3  | 0.4637 | 0.5899  |        |
|         |          | Pupa  | 8   | 78.7 | 13.4 | 8    | 93.9 | 3.8 | 8          | 84.9        | 5.0  | 0.2411 | 0.0012  |        |
|         |          | Adult | 8   | 97.0 | 3.3  | 8    | 98.9 | 3.1 | 8          | 94.1        | 8.6  | 0.3900 | 0.1545  |        |
| da-GAL4 | 9.1      | L1    | 8   | 97.0 | 3.5  | 8    | 97.0 | 2.8 | 8          | 98.5        | 2.1  | 0.3190 | 0.2462  |        |
|         |          | Pupa  | 8   | 80.4 | 3.2  | 8    | 93.9 | 3.8 | 8          | <b>76.1</b> | 4.1  | 0.0359 | 0.0000  |        |
|         |          | Adult | 8   | 98.8 | 3.5  | 8    | 98.9 | 3.1 | 8          | 99.3        | 2.0  | 0.7035 | 0.7654  |        |
| da-GAL4 | 3.1      | L1    | 8   | 94.5 | 5.2  | 8    | 97.0 | 2.8 | 8          | 95.0        | 5.1  | 0.8494 | 0.3504  | ↓      |
|         |          | Pupa  | 8   | 84.3 | 4.8  | 8    | 93.9 | 3.8 | 8          | 85.9        | 7.5  | 0.6152 | 0.0181  |        |
|         |          | Adult | 8   | 98.2 | 3.6  | 8    | 98.9 | 3.1 | 8          | 98.2        | 2.5  | 0.9984 | 0.5996  |        |
| da-GAL4 | 4.4      | L1    | 8   | 98.0 | 3.7  | 8    | 97.0 | 2.8 | 8          | 96.0        | 4.8  | 0.3654 | 0.6186  |        |
|         |          | Pupa  | 8   | 91.3 | 8.7  | 8    | 93.9 | 3.8 | 8          | 96.9        | 2.9  | 0.1070 | 0.0921  |        |
|         |          | Adult | 8   | 96.2 | 5.7  | 8    | 98.9 | 3.1 | 8          | 95.6        | 6.2  | 0.8593 | 0.1974  |        |
| da-GAL4 | 3.2/CyO  | L1    | 16  | 96.8 | 3.3  | 8    | 97.0 | 2.8 | 16         | 95.8        | 3.1  | 0.3940 | 0.3476  |        |
|         |          | Pupa  | 16  | 94.8 | 4.6  | 8    | 93.9 | 3.8 | 16         | 92.0        | 6.4  | 0.2323 | 0.4569  |        |
|         |          | Adult | 16  | 46.3 | 11.0 | 8    | 98.9 | 3.1 | 16         | 43.5        | 10.9 | 0.6573 | NA      |        |
| da-GAL4 | 10.1/CyO | L1    | 16  | 97.0 | 4.0  | 8    | 97.0 | 2.8 | 16         | 94.3        | 4.4  | 0.0733 | 0.1220  |        |
|         |          | Pupa  | 16  | 84.0 | 8.2  | 8    | 93.9 | 3.8 | 16         | 90.5        | 6.1  | 0.0154 | 0.1679  |        |
|         |          | Adult | 16  | 48.6 | 10.5 | 8    | 98.9 | 3.1 | 16         | 57.5        | 18.2 | 0.1006 | NA      |        |
| DJ694   | 2.1      | L1    | 8   | 95.0 | 4.7  | 8    | 80.5 | 9.2 | 8          | 78.0        | 8.0  | 0.0001 | 0.5707  |        |
|         |          | Pupa  | 8   | 93.8 | 5.1  | 8    | 89.7 | 7.0 | 8          | 81.0        | 10.6 | 0.0086 | 0.0743  |        |
|         |          | Adult | 8   | 98.2 | 2.4  | 8    | 99.2 | 2.2 | 8          | 95.4        | 6.9  | 0.2865 | 0.1563  |        |
| DJ694   | 4.3      | L1    | 8   | 95.0 | 5.1  | 8    | 80.5 | 9.2 | 8          | 80.0        | 12.1 | 0.0061 | 0.9271  | ↓      |
|         |          | Pupa  | 8   | 92.7 | 3.6  | 8    | 89.7 | 7.0 | 8          | <b>70.8</b> | 15.9 | 0.0020 | 0.0083  |        |
|         |          | Adult | 8   | 94.8 | 3.8  | 8    | 99.2 | 2.2 | 8          | 96.8        | 3.4  | 0.2968 | 0.1170  |        |
| DJ694   | 9.1      | L1    | 8   | 98.0 | 3.0  | 8    | 80.5 | 9.2 | 8          | <b>65.0</b> | 10.0 | 0.0000 | 0.0060  |        |
|         |          | Pupa  | 8   | 90.6 | 9.0  | 8    | 89.7 | 7.0 | 8          | 77.5        | 17.3 | 0.0776 | 0.0849  |        |
|         |          | Adult | 8   | 98.4 | 3.0  | 8    | 99.2 | 2.2 | 8          | 99.0        | 2.9  | 0.7306 | 0.8444  |        |
| DJ694   | 3.1      | L1    | 8   | 94.5 | 6.0  | 8    | 80.5 | 9.2 | 8          | 78.5        | 8.3  | 0.0006 | 0.6540  |        |
|         |          | Pupa  | 8   | 83.0 | 13.1 | 8    | 89.7 | 7.0 | 8          | 74.4        | 6.1  | 0.1123 | 0.0004  |        |
|         |          | Adult | 8   | 96.0 | 4.8  | 8    | 99.2 | 2.2 | 8          | 96.3        | 6.0  | 0.9216 | 0.2168  |        |
| DJ694   | 4.4      | L1    | 8   | 96.0 | 3.0  | 8    | 80.5 | 9.2 | 8          | 87.5        | 10.1 | 0.0392 | 0.1695  |        |
|         |          | Pupa  | 8   | 95.8 | 5.1  | 8    | 89.7 | 7.0 | 8          | 93.2        | 3.8  | 0.2667 | 0.2318  |        |
|         |          | Adult | 8   | 94.5 | 5.1  | 8    | 99.2 | 2.2 | 8          | 95.6        | 3.2  | 0.6213 | 0.0182  |        |
| DJ694   | 3.2/CyO  | L1    | 16  | 94.8 | 5.2  | 8    | 80.5 | 9.2 | 16         | 78.0        | 7.9  | 0.0000 | 0.4943  |        |
|         |          | Pupa  | 16  | 94.5 | 4.9  | 8    | 89.7 | 7.0 | 16         | 85.9        | 11.2 | 0.0161 | 0.3970  |        |
|         |          | Adult | 16  | 53.9 | 12.9 | 8    | 99.2 | 2.2 | 16         | 50.2        | 8.5  | 0.3201 | NA      |        |
| DJ694   | 10.1/CyO | L1    | 16  | 96.5 | 3.2  | 8    | 80.5 | 9.2 | 16         | <b>61.3</b> | 11.5 | 0.0000 | 0.0005  | ↓      |
|         |          | Pupa  | 16  | 91.0 | 6.1  | 8    | 89.7 | 7.0 | 16         | 94.2        | 6.2  | 0.1452 | 0.1227  |        |
|         |          | Adult | 16  | 56.7 | 9.1  | 8    | 99.2 | 2.2 | 16         | 56.6        | 10.1 | 0.9958 | NA      |        |
| D42     | 2.1      | L1    | 8   | 91.5 | 8.9  | 8    | 96.5 | 2.6 | 8          | 94.0        | 4.8  | 0.4965 | 0.2134  |        |
|         |          | Pupa  | 8   | 83.1 | 2.1  | 8    | 91.2 | 6.7 | 8          | 87.3        | 8.6  | 0.2012 | 0.3266  |        |
|         |          | Adult | 8   | 98.1 | 2.6  | 8    | 96.7 | 3.8 | 8          | 96.9        | 4.5  | 0.5063 | 0.9423  |        |
| D42     | 4.3      | L1    | 8   | 96.5 | 3.3  | 8    | 96.5 | 2.6 | 8          | 95.5        | 4.5  | 0.6217 | 0.5938  |        |
|         |          | Pupa  | 8   | 89.7 | 9.5  | 8    | 91.2 | 6.7 | 8          | 90.7        | 7.3  | 0.8189 | 0.8912  |        |
|         |          | Adult | 8   | 95.9 | 4.4  | 8    | 96.7 | 3.8 | 8          | 97.7        | 3.7  | 0.4073 | 0.6179  |        |

Table S1

| Gal4 | UAS      | Stage | UAS |      |      | Gal4 |      |     | Gal4 + UAS |      |     | P      |         | Change |
|------|----------|-------|-----|------|------|------|------|-----|------------|------|-----|--------|---------|--------|
|      |          |       | N   | Mean | STD  | N    | Mean | STD | N          | Mean | STD | vs UAS | vs Gal4 |        |
| D42  | 9.1      | L1    | 8   | 96.0 | 4.3  | 8    | 96.5 | 2.6 | 8          | 93.0 | 4.1 | 0.1759 | 0.0615  |        |
|      |          | Pupa  | 8   | 91.0 | 6.7  | 8    | 91.2 | 6.7 | 8          | 94.7 | 5.3 | 0.2444 | 0.2664  |        |
|      |          | Adult | 8   | 96.1 | 4.2  | 8    | 96.7 | 3.8 | 8          | 98.9 | 2.0 | 0.1086 | 0.1675  |        |
| D42  | 3.1      | L1    | 8   | 93.5 | 6.4  | 8    | 96.5 | 2.6 | 8          | 93.5 | 7.4 | 1.0000 | 0.2962  |        |
|      |          | Pupa  | 8   | 92.1 | 5.1  | 8    | 91.2 | 6.7 | 8          | 87.1 | 8.1 | 0.1540 | 0.2859  |        |
|      |          | Adult | 8   | 87.3 | 15.8 | 8    | 96.7 | 3.8 | 8          | 93.8 | 5.3 | 0.2900 | 0.2227  |        |
| D42  | 4.4      | L1    | 8   | 97.5 | 3.0  | 8    | 96.5 | 2.6 | 8          | 99.0 | 2.8 | 0.3190 | 0.0852  |        |
|      |          | Pupa  | 8   | 74.7 | 16.8 | 8    | 91.2 | 6.7 | 8          | 87.0 | 6.6 | 0.0745 | 0.2258  |        |
|      |          | Adult | 8   | 96.9 | 3.5  | 8    | 96.7 | 3.8 | 8          | 99.4 | 1.8 | 0.1029 | 0.0922  |        |
| D42  | 3.2/CyO  | L1    | 16  | 96.3 | 5.4  | 8    | 96.5 | 2.6 | 16         | 93.0 | 3.7 | 0.0690 | 0.0265  |        |
|      |          | Pupa  | 16  | 87.1 | 7.8  | 8    | 91.2 | 6.7 | 16         | 88.4 | 7.2 | 0.5426 | 0.3694  |        |
|      |          | Adult | 16  | 48.2 | 6.5  | 8    | 96.7 | 3.8 | 16         | 46.7 | 6.2 | 0.4143 | NA      |        |
| D42  | 10.1/CyO | L1    | 16  | 97.3 | 3.5  | 8    | 96.5 | 2.6 | 16         | 98.0 | 2.9 | 0.5150 | 0.2310  |        |
|      |          | Pupa  | 16  | 89.0 | 6.4  | 8    | 91.2 | 6.7 | 16         | 94.9 | 5.1 | 0.0069 | 0.1423  |        |
|      |          | Adult | 16  | 39.1 | 6.6  | 8    | 96.7 | 3.8 | 16         | 39.0 | 5.1 | 0.9748 | NA      |        |

**Table S1. Developmental analysis of Hsp70 overexpression.** Percentage hatching (L1), pupation (Pupa) and eclosion (Adult) are compared between experimental animals (Gal4+UAS) and control animals missing the driver (UAS) or UAS (Gal4) transgene (P: Kruskal-Wallis test). The first columns indicate the genotype of the mother while the second column indicate the genotype of the father used to generate the experimental and control animals. The change column indicates experimental animals that are significantly ( $P < 0.05$ ) lower than both controls. N: number of independent measurements, STD: Standard deviation.
