# Supplementary material
Source: publisher figshare collection journal article supplement (https://gsajournals.figshare.com/articles/dataset/_/9916223)
Supplement: Supplementary file [file 1]

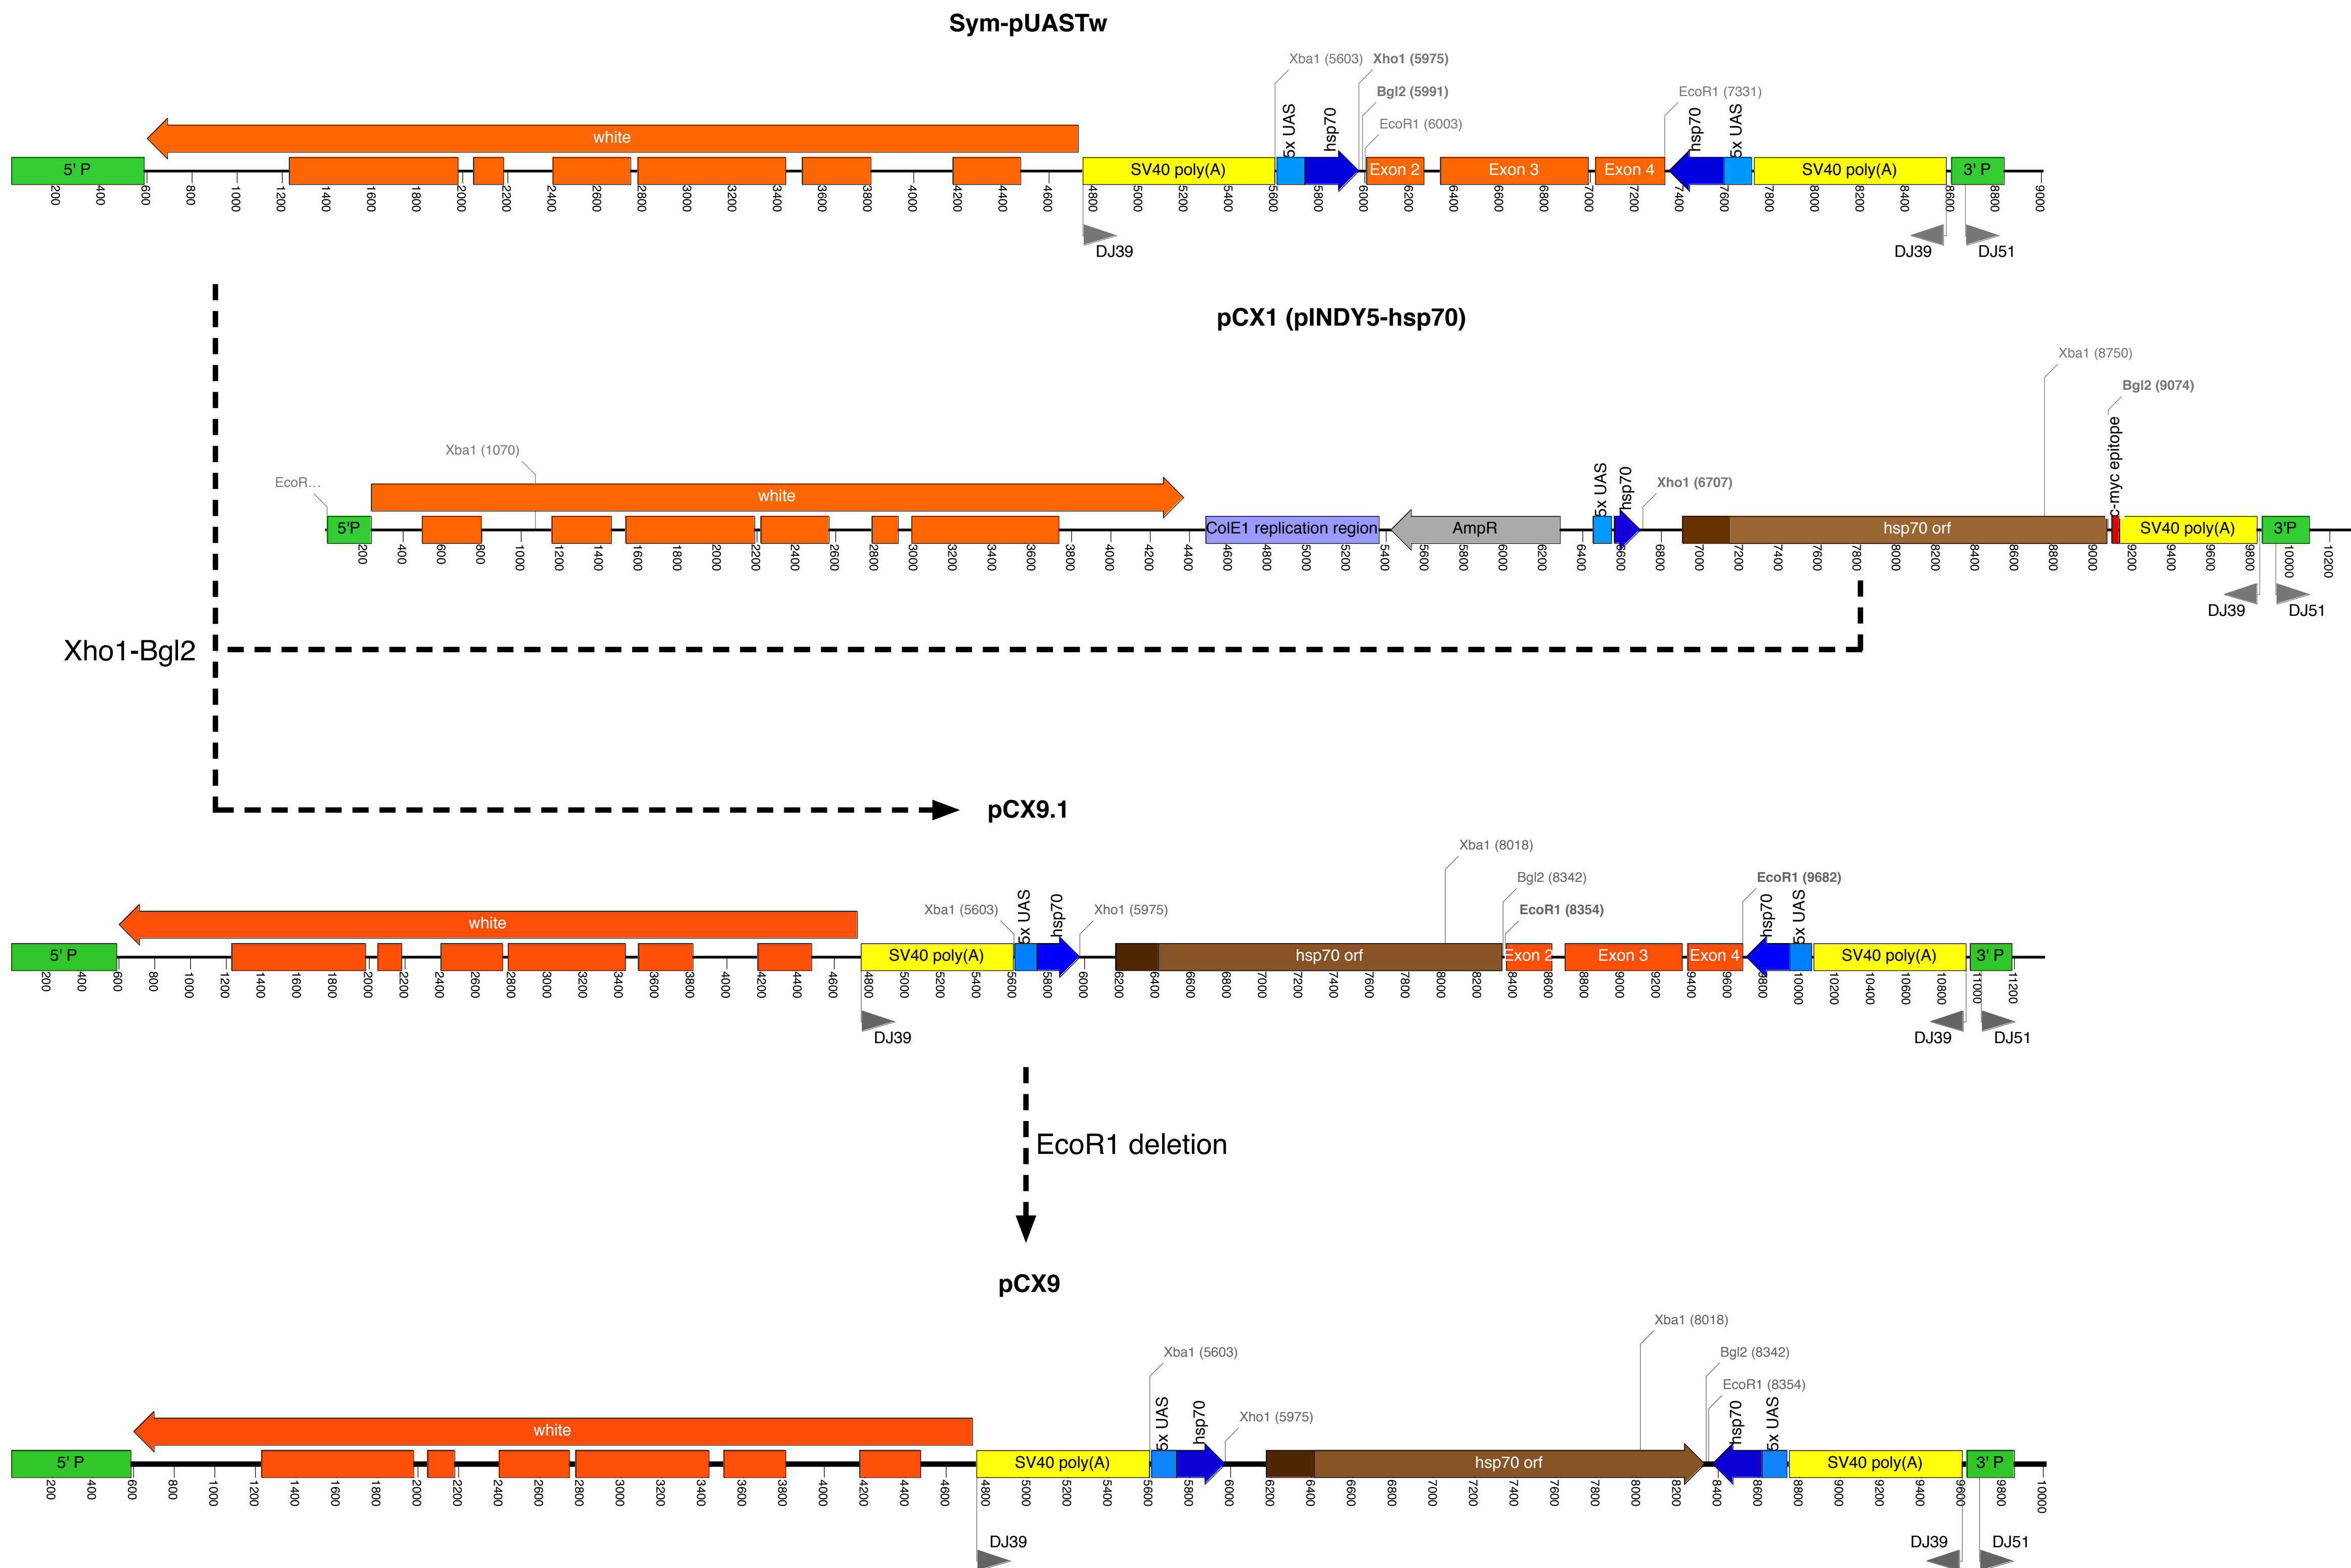

**Figure S4. Construction of pCX9 plasmid.** The *hsp70Ab* coding sequence (excised as a *XhoI*-*BglII* fragment from pCX1 (Xiao et al. 2007)) was first inserted into *XhoI*-*BglII*-opened Sym-pUASTw (Giordano et al. 2002) to obtain pCX9.1. The mini-*white* sequences from Sym-pUASTw were then removed by digestion with *EcoRI* and self-ligation to generate pCX9. Grey arrows show the binding sites for the oligonucleotides (DJ39, DJ51) used for inverse PCR.
