# Supplementary material
Source: publisher figshare collection journal article supplement (https://gsajournals.figshare.com/articles/dataset/_/9916223)
Supplement: Supplementary file [file 1]

Supplemental Figure 2

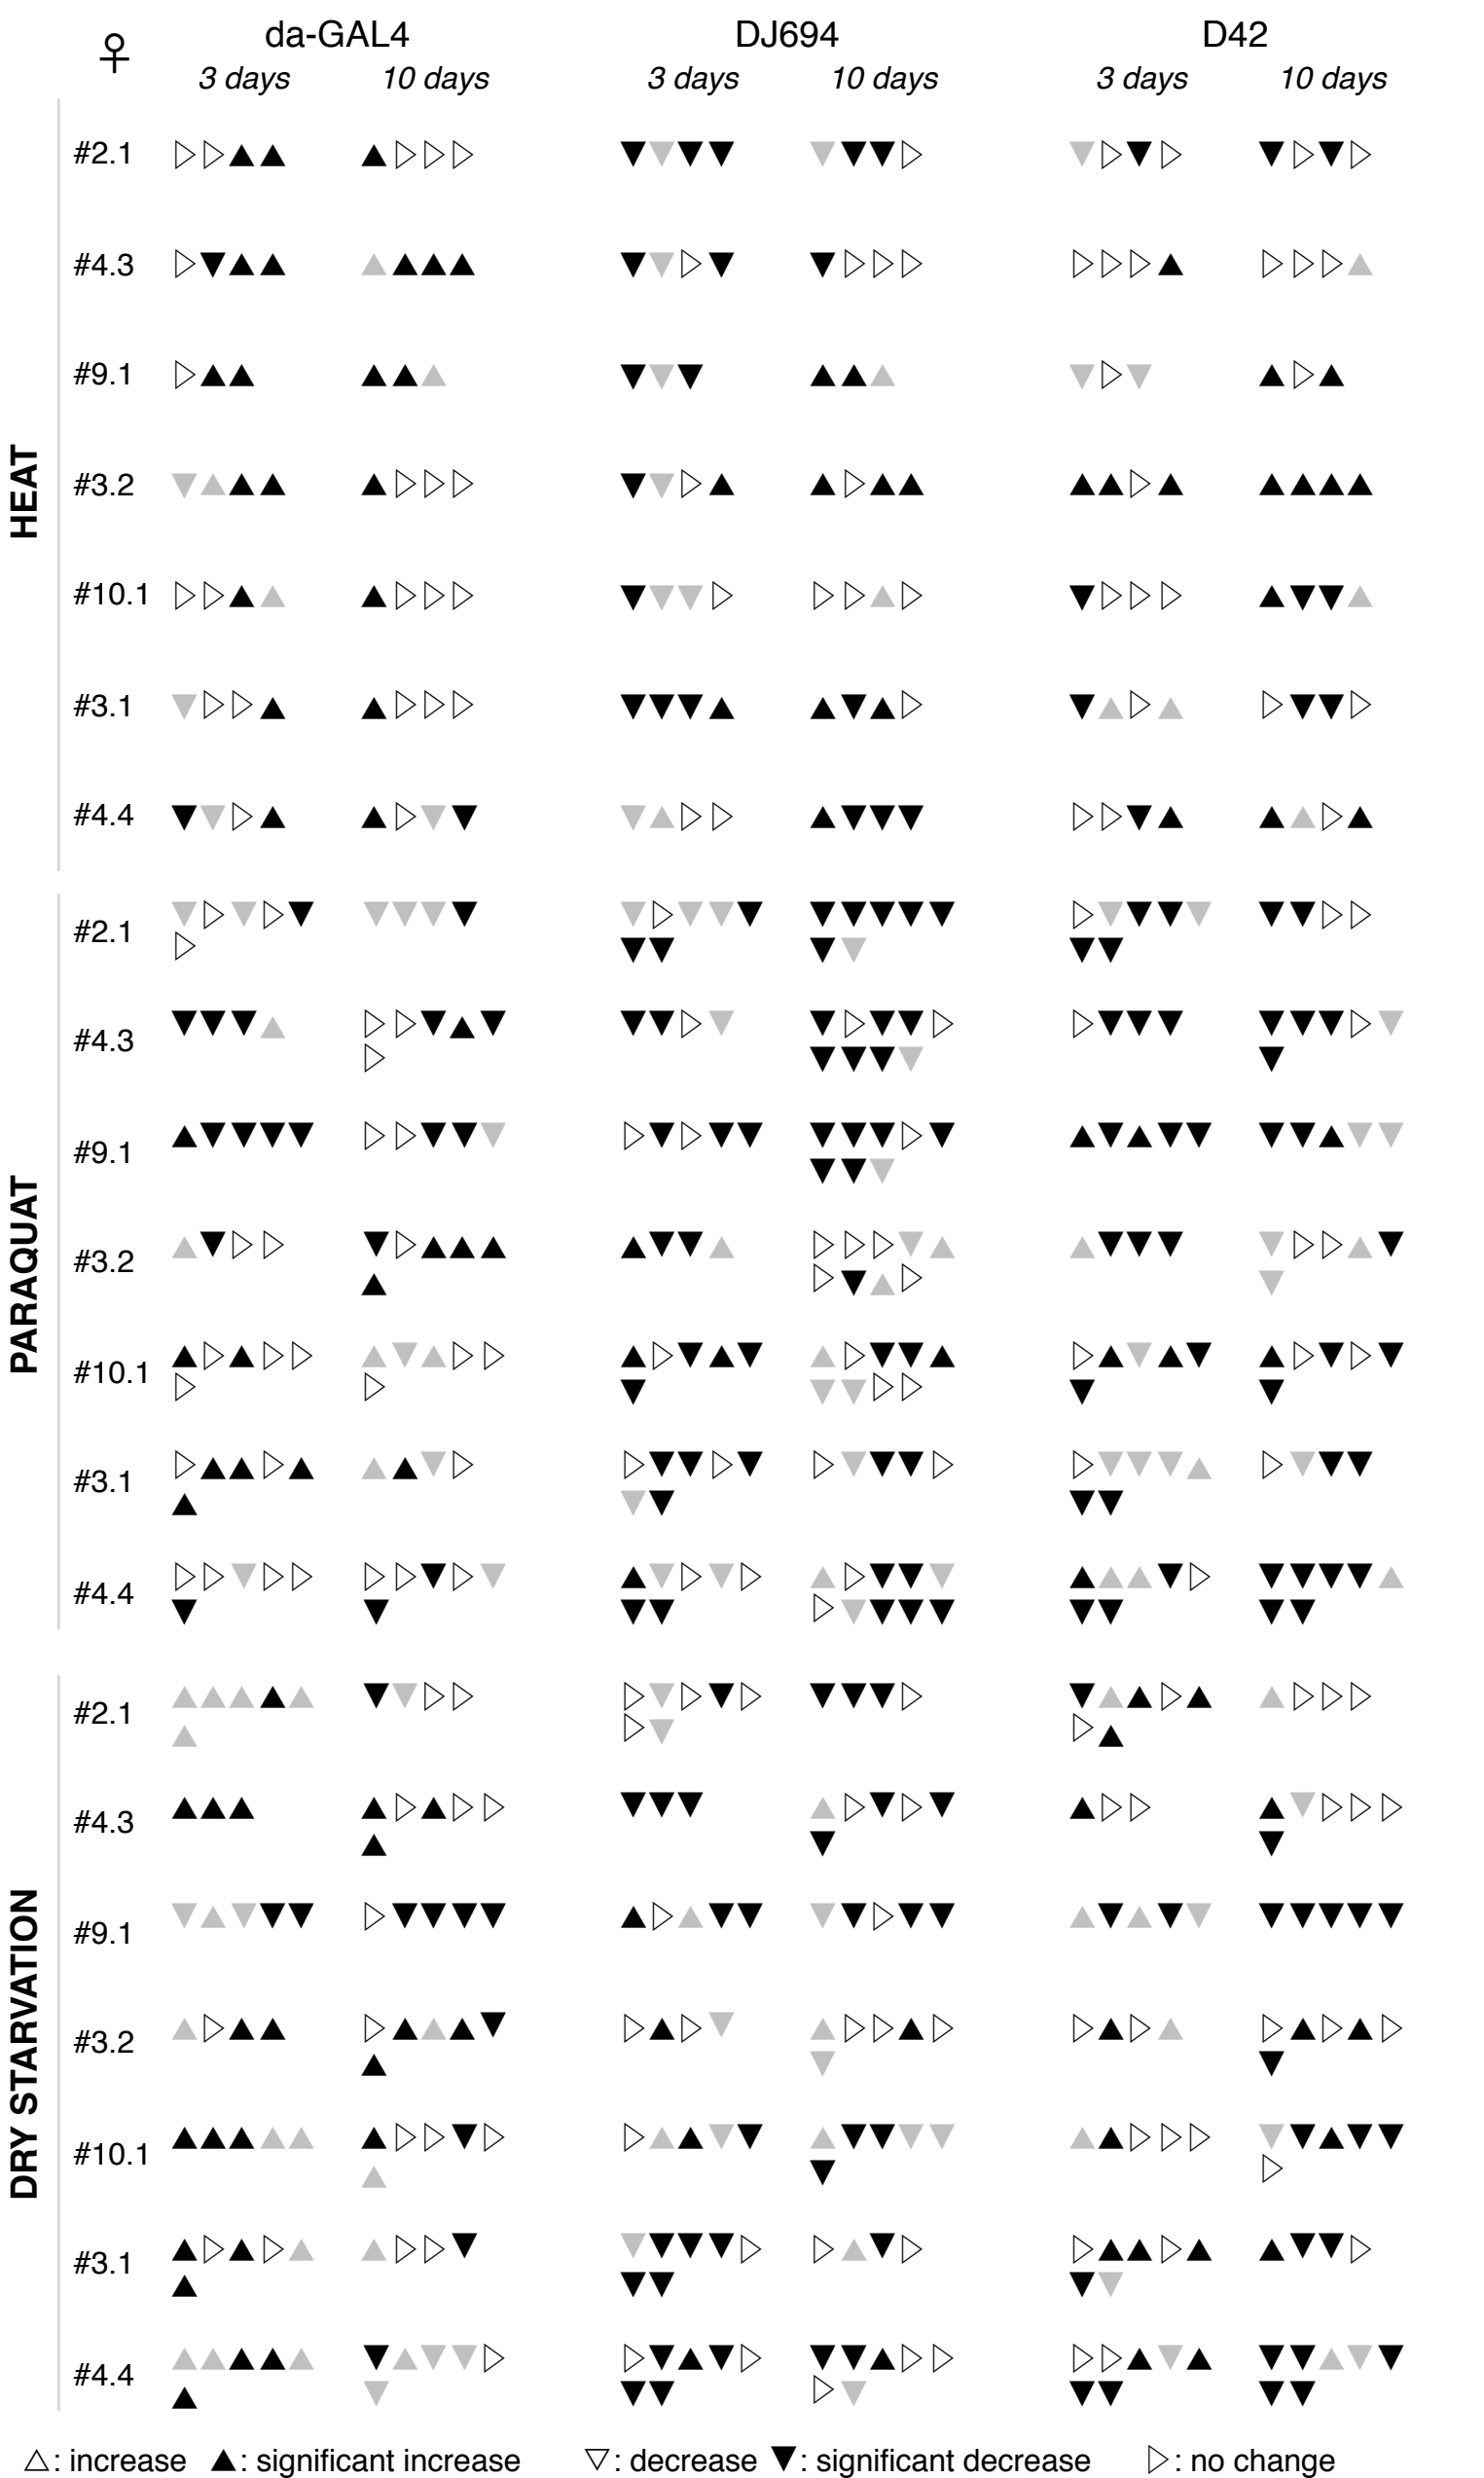

**Figure S2: Survival to thermal, oxidative and metabolic stresses of 3 days and 10 days old females overexpressing HSP70.** Each triangle reports the outcome of the statistical comparison (Table S2) between experimental and controls for an experimental replicate.
