# Supplementary material
Source: publisher figshare collection journal article supplement (https://gsajournals.figshare.com/articles/dataset/_/9916223)
Supplement: Supplementary file [file 1]

Table S4

| Gal4   | UAS    | Sex | Rep <sup>1</sup> | UAS |      |                  | Gal4 |      |                  | Gal4 + UAS |      |                  | % Extension |                  | P       |
|--------|--------|-----|------------------|-----|------|------------------|------|------|------------------|------------|------|------------------|-------------|------------------|---------|
|        |        |     |                  | n   | Mean | Max <sup>2</sup> | n    | Mean | Max <sup>2</sup> | n          | Mean | Max <sup>2</sup> | Mean        | Max <sup>2</sup> |         |
| daGal4 | R1.26  | ♀   | 1                | 120 | 50.0 | 72               | 117  | 76.4 | 92               | 118        | 56.0 | 81               | 0.0         | 0.0              |         |
| daGal4 | R1.26  | ♀   | 2                | 116 | 52.9 | 84               | 119  | 79.6 | 98               | 118        | 55.0 | 91               | 0.0         | 0.0              |         |
| daGal4 | R1.26  | ♀   | 3                | 116 | 52.9 | 84               | 119  | 79.6 | 98               | 118        | 55.0 | 91               | 0.0         | 0.0              |         |
| daGal4 | R1.26  | ♂   | 1                | 120 | 48.8 | 75               | 107  | 62.1 | 83               | 120        | 50.6 | 75               | 0.0         | -0.5             |         |
| daGal4 | R1.26  | ♂   | 2                | 122 | 48.9 | 67               | 115  | 58.0 | 67               | 119        | 51.3 | 67               | 0.0         | 0.0              |         |
| daGal4 | R1.26  | ♂   | 3                | 122 | 48.9 | 67               | 115  | 58.0 | 67               | 119        | 51.3 | 67               | 0.0         | 0.0              |         |
| daGal4 | R3.12  | ♀   | 1                | 119 | 55.8 | 79               | 116  | 55.8 | 79               | 121        | 67.9 | 91               | 21.5        | 15.2             | <0.0001 |
| daGal4 | R3.12  | ♀   | 2                | 118 | 52.5 | 73               | 116  | 61.7 | 88               | 118        | 71.4 | 94               | 15.8        | 6.8              | <0.0001 |
| daGal4 | R3.12  | ♂   | 1                | 120 | 53.2 | 69               | 118  | 48.1 | 62               | 120        | 60.5 | 76               | 13.9        | 10.1             | <0.0001 |
| daGal4 | R3.12  | ♂   | 2                | 120 | 50.1 | 66               | 121  | 50.0 | 66               | 118        | 63.1 | 81               | 26.1        | 23.0             | <0.0001 |
| daGal4 | R5.14  | ♀   | 1                | 118 | 50.5 | 72               | 117  | 76.4 | 92               | 119        | 57.9 | 92               | 0.0         | 0.0              |         |
| daGal4 | R5.14  | ♀   | 2                | 119 | 53.3 | 87               | 119  | 79.6 | 98               | 120        | 55.4 | 98               | 0.0         | 0.0              |         |
| daGal4 | R5.14  | ♀   | 3                | 29  | 59.0 | 73               | 32   | 75.2 | 88               | 29         | 57.1 | 77               | -3.2        | 0.0              | 0.7638  |
| daGal4 | R5.14  | ♂   | 1                | 120 | 36.9 | 57               | 107  | 62.1 | 83               | 123        | 48.6 | 68               | 0.0         | 0.0              |         |
| daGal4 | R5.14  | ♂   | 2                | 117 | 42.8 | 56               | 115  | 58.0 | 67               | 121        | 51.3 | 67               | 0.0         | 0.0              |         |
| daGal4 | R5.14  | ♂   | 3                | 30  | 38.7 | 55               | 29   | 73.0 | 88               | 30         | 50.6 | 60               | 0.0         | 0.0              |         |
| DJ694  | R1.26  | ♀   | 1                | 120 | 50.0 | 72               | 120  | 71.4 | 85               | 116        | 63.9 | 85               | 0.0         | 0.5              |         |
| DJ694  | R1.26  | ♀   | 2                | 116 | 52.9 | 84               | 122  | 81.5 | 98               | 115        | 64.8 | 92               | 0.0         | 0.0              |         |
| DJ694  | R1.26  | ♀   | 3                | 116 | 52.9 | 84               | 122  | 81.5 | 98               | 115        | 64.8 | 92               | 0.0         | 0.0              |         |
| DJ694  | R1.26  | ♂   | 1                | 120 | 48.8 | 75               | 116  | 62.6 | 68               | 122        | 54.4 | 71               | 0.0         | 0.0              |         |
| DJ694  | R1.26  | ♂   | 2                | 122 | 48.9 | 67               | 116  | 62.6 | 67               | 116        | 56.7 | 67               | 0.0         | 0.0              |         |
| DJ694  | R1.26  | ♂   | 3                | 122 | 48.9 | 67               | 116  | 62.6 | 67               | 116        | 56.7 | 67               | 0.0         | 0.0              |         |
| DJ694  | R3.12  | ♀   | 1                | 119 | 55.8 | 79               | 118  | 64.3 | 84               | 120        | 83.1 | 97               | 29.4        | 15.5             | <0.0001 |
| DJ694  | R3.12  | ♀   | 2                | 118 | 52.5 | 73               | 118  | 61.8 | 81               | 120        | 76.1 | 97               | 23.0        | 19.8             | <0.0001 |
| DJ694  | R3.12  | ♂   | 1                | 120 | 53.2 | 69               | 118  | 54.4 | 69               | 119        | 73.9 | 97               | 35.9        | 40.6             | <0.0001 |
| DJ694  | R3.12  | ♂   | 2                | 120 | 50.1 | 66               | 119  | 54.5 | 66               | 119        | 75.4 | 94               | 38.3        | 42.4             | <0.0001 |
| DJ694  | R5.14  | ♀   | 1                | 118 | 50.5 | 72               | 120  | 71.4 | 85               | 118        | 65.0 | 92               | 0.0         | 8.2              |         |
| DJ694  | R5.14  | ♀   | 2                | 119 | 53.3 | 87               | 122  | 81.5 | 98               | 112        | 64.4 | 95               | 0.0         | 0.0              |         |
| DJ694  | R5.14  | ♀   | 3                | 29  | 59.0 | 73               | 30   | 76.9 | 93               | 28         | 77.6 | 88               | 0.9         | 0.0              |         |
| DJ694  | R5.14  | ♂   | 1                | 120 | 36.9 | 57               | 116  | 62.6 | 68               | 117        | 49.9 | 68               | 0.0         | 0.0              |         |
| DJ694  | R5.14  | ♂   | 2                | 117 | 42.8 | 56               | 116  | 62.6 | 67               | 119        | 53.0 | 67               | 0.0         | 0.0              |         |
| DJ694  | R5.14  | ♂   | 3                | 30  | 38.7 | 55               | 29   | 58.0 | 60               | 30         | 47.7 | 60               | 0.0         | 0.0              |         |
| D42    | R1.17  | ♀   | 1                | 28  | 73.2 | 88               | 30   | 81.2 | 95               | 30         | 84.6 | 90               | 4.2         | 0.0              | 0.7681  |
| D42    | R1.17  | ♂   | 1                | 29  | 59.7 | 76               | 30   | 78.3 | 91               | 29         | 64.8 | 74               | 0.0         | -2.6             |         |
| D42    | R1.26  | ♀   | 1                | 120 | 50.0 | 72               | 119  | 75.9 | 92               | 115        | 61.1 | 76               | 0.0         | 0.0              |         |
| D42    | R1.26  | ♀   | 2                | 116 | 52.9 | 84               | 119  | 84.7 | 98               | 116        | 72.5 | 98               | 0.0         | 0.0              |         |
| D42    | R1.26  | ♀   | 3                | 116 | 52.9 | 84               | 119  | 84.7 | 98               | 116        | 72.5 | 98               | 0.0         | 0.0              |         |
| D42    | R1.26  | ♂   | 1                | 120 | 48.8 | 75               | 118  | 59.4 | 68               | 115        | 52.9 | 68               | 0.0         | 0.0              |         |
| D42    | R1.26  | ♂   | 2                | 122 | 48.9 | 67               | 119  | 60.2 | 67               | 117        | 54.5 | 67               | 0.0         | 0.0              |         |
| D42    | R1.26  | ♂   | 3                | 122 | 48.9 | 67               | 119  | 60.2 | 67               | 117        | 54.5 | 67               | 0.0         | 0.0              |         |
| D42    | R3.12  | ♀   | 1                | 119 | 55.8 | 79               | 119  | 63.4 | 84               | 118        | 69.9 | 91               | 10.4        | 8.3              | 0.0003  |
| D42    | R3.12  | ♀   | 2                | 118 | 52.5 | 73               | 120  | 66.0 | 88               | 119        | 71.0 | 94               | 7.6         | 6.8              | 0.0145  |
| D42    | R3.12  | ♀   | 3                | 27  | 69.4 | 89               | 30   | 81.2 | 95               | 30         | 65.9 | 90               | -5.0        | 0.0              | 0.0171  |
| D42    | R3.12  | ♂   | 1                | 120 | 53.2 | 69               | 120  | 56.0 | 69               | 118        | 61.8 | 76               | 10.4        | 10.1             | <0.0001 |
| D42    | R3.12  | ♂   | 2                | 120 | 50.1 | 66               | 115  | 57.7 | 73               | 118        | 65.5 | 88               | 13.6        | 20.5             | <0.0001 |
| D42    | R3.12  | ♂   | 3                | 30  | 70.1 | 88               | 30   | 78.3 | 91               | 30         | 62.4 | 83               | -10.9       | -5.5             | 0.031   |
| D42    | R5.2   | ♀   | 1                | 30  | 65.0 | 86               | 30   | 81.2 | 95               | 27         | 59.9 | 83               | -7.9        | -3.5             | 0.2044  |
| D42    | R5.2   | ♂   | 1                | 30  | 73.9 | 93               | 30   | 78.3 | 91               | 29         | 58.7 | 78               | -20.6       | -15.2            | <0.0001 |
| D42    | R5.12e | ♀   | 1                | 30  | 60.9 | 83               | 30   | 81.2 | 95               | 25         | 55.8 | 93               | -8.3        | 0.0              | 0.7819  |
| D42    | R5.12e | ♂   | 1                | 31  | 59.0 | 76               | 30   | 78.3 | 91               | 30         | 60.1 | 82               | 0.0         | 0.0              |         |

Table S4

2

| Gal4 | UAS   | Sex | Rep <sup>1</sup> | UAS |      |                  | Gal4 |      |                  | Gal4 + UAS |      |                  | % Extension |                  | <i>P</i> |
|------|-------|-----|------------------|-----|------|------------------|------|------|------------------|------------|------|------------------|-------------|------------------|----------|
|      |       |     |                  | n   | Mean | Max <sup>2</sup> | n    | Mean | Max <sup>2</sup> | n          | Mean | Max <sup>2</sup> | Mean        | Max <sup>2</sup> |          |
| D42  | R5.14 | ♀   | 1                | 118 | 50.5 | 72               | 119  | 75.9 | 92               | 114        | 65.4 | 82               | 0.0         | 0.0              |          |
| D42  | R5.14 | ♀   | 2                | 119 | 53.3 | 87               | 119  | 84.7 | 98               | 117        | 64.3 | 91               | 0.0         | 0.0              |          |
| D42  | R5.14 | ♀   | 3                | 29  | 59.0 | 73               | 32   | 79.0 | 88               | 29         | 58.9 | 77               | -0.1        | 0.0              |          |
| D42  | R5.14 | ♂   | 1                | 120 | 36.9 | 57               | 118  | 59.4 | 68               | 119        | 46.8 | 63               | 0.0         | 0.0              |          |
| D42  | R5.14 | ♂   | 2                | 117 | 42.8 | 56               | 119  | 60.2 | 67               | 119        | 53.9 | 63               | 0.0         | 0.0              |          |
| D42  | R5.14 | ♂   | 3                | 30  | 38.7 | 55               | 29   | 58.6 | 60               | 29         | 44.6 | 50               | 0.0         | -8.3             |          |

**Table S4: Longevity data and analysis of Hsp70 RNAi.** Mean: average survival in days, n: number of flies in the replicate, P: highest Log-rank test value, 1: replicate number, 2: 95% mortality (maximum lifespan)
