# Supplementary material
Source: publisher figshare collection journal article supplement (https://gsajournals.figshare.com/articles/dataset/_/9916223)
Supplement: Supplementary file [file 1]

Table S3

| Gal4   | UAS  | Sex | Rep <sup>1</sup> | UAS |      |                  | Gal4 |      |                  | Gal4 + UAS |      |                  | % Extension |                  | P                 |
|--------|------|-----|------------------|-----|------|------------------|------|------|------------------|------------|------|------------------|-------------|------------------|-------------------|
|        |      |     |                  | n   | Mean | Max <sup>2</sup> | n    | Mean | Max <sup>2</sup> | n          | Mean | Max <sup>2</sup> | Mean        | Max <sup>2</sup> |                   |
| daGal4 | 2.1  | ♀   | 1                | 115 | 55.4 | 78               | 110  | 66.3 | 95               | 120        | 66.7 | 81               | 0.6         | 0.0              | <b>0.0013</b>     |
| daGal4 | 2.1  | ♀   | 2                | 114 | 66.2 | 94               | 95   | 70.8 | 90               | 90         | 75.7 | 90               | 6.9         | 0.0              | 0.7069            |
| daGal4 | 2.1  | ♀   | 3                | 112 | 58.9 | 81               | 119  | 71.5 | 88               | 117        | 62.1 | 74               | 0.0         | -8.6             |                   |
| daGal4 | 2.1  | ♀   | 4                | 118 | 60.2 | 87               | 113  | 70.6 | 87               | 118        | 65.9 | 80               | 0.0         | -8.0             |                   |
| daGal4 | 2.1  | ♀   | 5                | 90  | 63.1 | 76               | 102  | 69.3 | 87               | 103        | 65.9 | 80               | 0.0         | 0.0              |                   |
| daGal4 | 2.1  | ♀   | 6                | 111 | 58.8 | 72               | 109  | 71.9 | 86               | 111        | 64.3 | 79               | 0.0         | 0.0              |                   |
| daGal4 | 2.1  | ♂   | 1                | 117 | 49.4 | 75               | 113  | 50.6 | 75               | 116        | 45.6 | 51               | -7.7        | -32.0            | <b>&lt;0.0001</b> |
| daGal4 | 2.1  | ♂   | 2                | 113 | 52.3 | 63               | 107  | 53.9 | 70               | 118        | 47.1 | 60               | -9.9        | -4.8             | <b>&lt;0.0001</b> |
| daGal4 | 2.1  | ♂   | 3                | 113 | 56.0 | 67               | 118  | 64.2 | 81               | 117        | 50.5 | 57               | -9.7        | -14.9            | <b>&lt;0.0001</b> |
| daGal4 | 2.1  | ♂   | 4                | 112 | 57.0 | 69               | 117  | 60.5 | 80               | 116        | 52.0 | 66               | -8.9        | -4.3             | <b>&lt;0.0001</b> |
| daGal4 | 2.1  | ♂   | 5                | 102 | 55.5 | 69               | 100  | 60.5 | 73               | 117        | 52.9 | 66               | -4.7        | -4.3             | <b>0.0035</b>     |
| daGal4 | 2.1  | ♂   | 6                | 117 | 54.0 | 68               | 107  | 59.7 | 72               | 112        | 54.5 | 68               | 0.0         | 0.0              |                   |
| daGal4 | 4.3  | ♀   | 1                | 121 | 53.9 | 66               | 102  | 71.8 | 94               | 122        | 66.0 | 85               | 0.0         | 0.0              |                   |
| daGal4 | 4.3  | ♀   | 2                | 111 | 54.2 | 69               | 107  | 70.3 | 97               | 100        | 68.0 | 87               | 0.0         | 0.0              |                   |
| daGal4 | 4.3  | ♀   | 3                | 112 | 54.8 | 70               | 119  | 71.5 | 88               | 118        | 56.7 | 74               | 0.0         | 0.0              |                   |
| daGal4 | 4.3  | ♀   | 4                | 119 | 51.0 | 66               | 113  | 70.6 | 87               | 117        | 62.5 | 76               | 0.0         | 0.0              |                   |
| daGal4 | 4.3  | ♀   | 5                | 119 | 48.2 | 62               | 102  | 69.3 | 87               | 109        | 54.4 | 66               | 0.0         | 0.0              |                   |
| daGal4 | 4.3  | ♀   | 6                | 122 | 51.7 | 68               | 109  | 71.9 | 86               | 117        | 61.2 | 79               | 0.0         | 0.0              |                   |
| daGal4 | 4.3  | ♂   | 1                | 120 | 48.0 | 59               | 114  | 59.1 | 85               | 118        | 41.9 | 46               | -12.7       | -22.0            | <b>&lt;0.0001</b> |
| daGal4 | 4.3  | ♂   | 2                | 120 | 48.2 | 63               | 115  | 57.7 | 76               | 115        | 41.5 | 45               | -13.9       | -28.6            | <b>&lt;0.0001</b> |
| daGal4 | 4.3  | ♂   | 3                | 118 | 46.8 | 53               | 118  | 64.2 | 81               | 119        | 40.3 | 49               | -14.0       | -7.5             | <b>&lt;0.0001</b> |
| daGal4 | 4.3  | ♂   | 4                | 113 | 43.0 | 52               | 117  | 60.5 | 80               | 112        | 42.0 | 52               | -2.3        | 0.0              | 0.6680            |
| daGal4 | 4.3  | ♂   | 5                | 118 | 48.1 | 56               | 100  | 60.5 | 73               | 107        | 38.7 | 52               | -19.5       | -7.1             | <b>&lt;0.0001</b> |
| daGal4 | 4.3  | ♂   | 6                | 120 | 46.2 | 55               | 107  | 59.7 | 72               | 119        | 38.0 | 47               | -17.7       | -14.5            | <b>&lt;0.0001</b> |
| daGal4 | 9.1  | ♀   | 1                | 119 | 54.6 | 74               | 119  | 71.5 | 88               | 115        | 53.9 | 67               | -1.2        | -9.5             | 0.9776            |
| daGal4 | 9.1  | ♀   | 2                | 118 | 56.2 | 73               | 113  | 70.6 | 87               | 120        | 55.3 | 69               | -1.6        | -5.5             | 0.5707            |
| daGal4 | 9.1  | ♀   | 3                | 126 | 52.0 | 66               | 102  | 69.3 | 87               | 120        | 52.5 | 66               | 0.0         | 0.0              |                   |
| daGal4 | 9.1  | ♀   | 4                | 118 | 54.8 | 75               | 109  | 71.9 | 86               | 116        | 57.0 | 72               | 0.0         | -4.0             |                   |
| daGal4 | 9.1  | ♂   | 1                | 116 | 47.0 | 60               | 118  | 64.2 | 81               | 116        | 46.4 | 53               | -1.2        | -11.7            | 0.2053            |
| daGal4 | 9.1  | ♂   | 2                | 117 | 48.6 | 59               | 117  | 60.5 | 80               | 120        | 44.9 | 56               | -7.8        | -5.1             | <b>&lt;0.0001</b> |
| daGal4 | 9.1  | ♂   | 3                | 116 | 44.6 | 56               | 100  | 60.5 | 73               | 126        | 41.5 | 52               | -7.1        | -7.1             | <b>0.0019</b>     |
| daGal4 | 9.1  | ♂   | 4                | 115 | 50.5 | 61               | 107  | 59.7 | 72               | 116        | 44.1 | 55               | -12.6       | -9.8             | <b>&lt;0.0001</b> |
| daGal4 | 3.2  | ♀   | 1                | 118 | 70.5 | 93               | 116  | 55.8 | 79               | 117        | 58.0 | 62               | 0.0         | -21.5            |                   |
| daGal4 | 3.2  | ♀   | 2                | 117 | 74.2 | 101              | 116  | 61.7 | 88               | 115        | 58.8 | 66               | -4.7        | -25.0            | <b>&lt;0.0001</b> |
| daGal4 | 3.2  | ♀   | 3                | 113 | 69.5 | 81               | 119  | 71.5 | 88               | 119        | 50.5 | 57               | -27.2       | -29.6            | <b>&lt;0.0001</b> |
| daGal4 | 3.2  | ♀   | 4                | 118 | 74.0 | 87               | 113  | 70.6 | 87               | 122        | 51.3 | 56               | -27.4       | -35.6            | <b>&lt;0.0001</b> |
| daGal4 | 3.2  | ♀   | 5                | 110 | 67.2 | 87               | 102  | 69.3 | 87               | 115        | 52.4 | 56               | -22.0       | -35.6            | <b>&lt;0.0001</b> |
| daGal4 | 3.2  | ♀   | 6                | 115 | 71.0 | 86               | 109  | 71.9 | 86               | 118        | 50.6 | 55               | -28.7       | -36.0            | <b>&lt;0.0001</b> |
| daGal4 | 3.2  | ♂   | 1                | 116 | 62.4 | 84               | 118  | 48.1 | 62               | 118        | 42.6 | 51               | -11.4       | -17.7            | <b>&lt;0.0001</b> |
| daGal4 | 3.2  | ♂   | 2                | 103 | 63.5 | 88               | 121  | 50.0 | 66               | 119        | 43.4 | 52               | -13.2       | -21.2            | <b>&lt;0.0001</b> |
| daGal4 | 3.2  | ♂   | 3                | 116 | 62.3 | 81               | 118  | 64.2 | 81               | 116        | 39.9 | 53               | -35.9       | -34.6            | <b>&lt;0.0001</b> |
| daGal4 | 3.2  | ♂   | 4                | 118 | 65.0 | 83               | 117  | 60.5 | 80               | 120        | 42.4 | 52               | -29.9       | -35.0            | <b>&lt;0.0001</b> |
| daGal4 | 3.2  | ♂   | 5                | 110 | 60.5 | 73               | 100  | 60.5 | 73               | 115        | 35.9 | 41               | -40.7       | -43.8            | <b>&lt;0.0001</b> |
| daGal4 | 3.2  | ♂   | 6                | 116 | 64.1 | 79               | 107  | 59.7 | 72               | 117        | 39.9 | 51               | -33.2       | -29.2            | <b>&lt;0.0001</b> |
| daGal4 | 10.1 | ♀   | 1                | 117 | 68.4 | 88               | 119  | 71.5 | 88               | 121        | 62.3 | 81               | -8.9        | -8.0             | <b>&lt;0.0001</b> |
| daGal4 | 10.1 | ♀   | 2                | 110 | 63.2 | 87               | 113  | 70.6 | 87               | 115        | 65.2 | 80               | 0.0         | -8.0             |                   |
| daGal4 | 10.1 | ♀   | 3                | 111 | 63.0 | 80               | 102  | 69.3 | 87               | 97         | 61.0 | 80               | -3.2        | 0.0              | 0.3652            |
| daGal4 | 10.1 | ♀   | 4                | 116 | 64.1 | 86               | 109  | 71.9 | 86               | 115        | 55.9 | 72               | -12.8       | -16.3            | <b>&lt;0.0001</b> |
| daGal4 | 10.1 | ♂   | 1                | 113 | 69.3 | 84               | 118  | 64.2 | 81               | 119        | 58.1 | 67               | -9.6        | -17.3            | <b>&lt;0.0001</b> |
| daGal4 | 10.1 | ♂   | 2                | 121 | 67.3 | 83               | 117  | 60.5 | 80               | 118        | 57.7 | 69               | -4.5        | -13.8            | 0.0720            |
| daGal4 | 10.1 | ♂   | 3                | 96  | 64.9 | 80               | 100  | 60.5 | 73               | 109        | 57.5 | 66               | -5.0        | -9.6             | <b>&lt;0.0001</b> |
| daGal4 | 10.1 | ♂   | 4                | 122 | 63.0 | 82               | 107  | 59.7 | 72               | 119        | 58.6 | 68               | -1.8        | -5.6             | <b>0.0248</b>     |

Table S3

| Gal4   | UAS | Sex | Rep <sup>1</sup> | UAS |      |                  | Gal4 |      |                  | Gal4 + UAS |      |                  | % Extension |                  | P       |
|--------|-----|-----|------------------|-----|------|------------------|------|------|------------------|------------|------|------------------|-------------|------------------|---------|
|        |     |     |                  | n   | Mean | Max <sup>2</sup> | n    | Mean | Max <sup>2</sup> | n          | Mean | Max <sup>2</sup> | Mean        | Max <sup>2</sup> |         |
| daGal4 | 3.1 | ♀   | 1                | 117 | 60.5 | 87               | 117  | 57.0 | 84               | 118        | 73.5 | 91               | 21.6        | 4.6              | <0.0001 |
| daGal4 | 3.1 | ♀   | 2                | 113 | 63.8 | 87               | 116  | 69.1 | 94               | 119        | 75.2 | 94               | 8.8         | 0.0              | 0.2671  |
| daGal4 | 3.1 | ♀   | 3                | 118 | 83.7 | 106              | 102  | 71.8 | 94               | 108        | 73.5 | 91               | 0.0         | -3.2             |         |
| daGal4 | 3.1 | ♀   | 4                | 120 | 78.2 | 105              | 107  | 70.3 | 97               | 121        | 69.3 | 84               | -1.4        | -13.4            | 0.5209  |
| daGal4 | 3.1 | ♀   | 5                | 110 | 68.0 | 84               | 119  | 71.5 | 88               | 115        | 60.5 | 81               | -11.0       | -3.6             | 0.0003  |
| daGal4 | 3.1 | ♀   | 6                | 118 | 58.4 | 80               | 113  | 70.6 | 87               | 110        | 61.3 | 80               | 0.0         | 0.0              |         |
| daGal4 | 3.1 | ♀   | 7                | 94  | 62.1 | 73               | 102  | 69.3 | 87               | 101        | 64.3 | 83               | 0.0         | 0.0              |         |
| daGal4 | 3.1 | ♀   | 8                | 102 | 54.9 | 75               | 109  | 71.9 | 86               | 118        | 57.3 | 75               | 0.0         | 0.0              |         |
| daGal4 | 3.1 | ♂   | 1                | 116 | 48.6 | 78               | 122  | 48.6 | 68               | 121        | 46.6 | 63               | -4.0        | -7.4             | 0.0275  |
| daGal4 | 3.1 | ♂   | 2                | 115 | 45.6 | 57               | 116  | 56.7 | 80               | 119        | 47.6 | 60               | 0.0         | 0.0              |         |
| daGal4 | 3.1 | ♂   | 3                | 116 | 72.8 | 98               | 114  | 59.1 | 85               | 122        | 62.3 | 77               | 0.0         | -9.4             |         |
| daGal4 | 3.1 | ♂   | 4                | 121 | 67.8 | 87               | 115  | 57.7 | 76               | 118        | 56.9 | 72               | -1.4        | -5.3             | 0.9662  |
| daGal4 | 3.1 | ♂   | 5                | 115 | 66.3 | 81               | 118  | 64.2 | 81               | 116        | 53.8 | 67               | -16.1       | -17.3            | <0.0001 |
| daGal4 | 3.1 | ♂   | 6                | 119 | 61.2 | 80               | 117  | 60.5 | 80               | 119        | 54.0 | 66               | -10.6       | -17.5            | <0.0001 |
| daGal4 | 3.1 | ♂   | 7                | 102 | 59.3 | 80               | 100  | 60.5 | 73               | 117        | 51.5 | 62               | -13.1       | -15.1            | <0.0001 |
| daGal4 | 3.1 | ♂   | 8                | 117 | 59.9 | 79               | 107  | 59.7 | 72               | 119        | 51.6 | 65               | -13.5       | -9.7             | <0.0001 |
| daGal4 | 4.4 | ♀   | 1                | 118 | 63.7 | 81               | 119  | 71.5 | 88               | 119        | 56.8 | 74               | -10.8       | -8.6             | <0.0001 |
| daGal4 | 4.4 | ♀   | 2                | 120 | 55.7 | 80               | 113  | 70.6 | 87               | 86         | 62.1 | 76               | 0.0         | -5.0             |         |
| daGal4 | 4.4 | ♀   | 3                | 97  | 62.9 | 80               | 102  | 69.3 | 87               | 112        | 54.3 | 73               | -13.6       | -8.8             | <0.0001 |
| daGal4 | 4.4 | ♀   | 4                | 119 | 52.7 | 79               | 109  | 71.9 | 86               | 113        | 59.8 | 79               | 0.0         | 0.0              |         |
| daGal4 | 4.4 | ♂   | 1                | 117 | 61.2 | 74               | 118  | 64.2 | 81               | 117        | 50.5 | 63               | -17.4       | -14.9            | <0.0001 |
| daGal4 | 4.4 | ♂   | 2                | 119 | 53.6 | 69               | 117  | 60.5 | 80               | 114        | 52.3 | 66               | -2.3        | -4.3             | 0.3705  |
| daGal4 | 4.4 | ♂   | 3                | 108 | 56.1 | 66               | 100  | 60.5 | 73               | 122        | 51.0 | 56               | -9.1        | -15.2            | <0.0001 |
| daGal4 | 4.4 | ♂   | 4                | 117 | 54.1 | 68               | 107  | 59.7 | 72               | 117        | 53.4 | 65               | -1.3        | -4.4             | 0.0029  |
| DJ694  | 2.1 | ♀   | 1                | 115 | 55.4 | 78               | 112  | 72.7 | 88               | 120        | 79.2 | 91               | 9.0         | 3.4              | <0.0001 |
| DJ694  | 2.1 | ♀   | 2                | 114 | 66.2 | 94               | 114  | 76.3 | 94               | 120        | 85.8 | 94               | 12.4        | 0.0              | <0.0001 |
| DJ694  | 2.1 | ♀   | 3                | 120 | 65.1 | 75               | 119  | 74.0 | 83               | 119        | 74.0 | 83               | 0.1         | 0.0              | 0.2063  |
| DJ694  | 2.1 | ♀   | 4                | 118 | 58.0 | 71               | 117  | 68.3 | 82               | 120        | 68.0 | 82               | 0.0         | 0.0              |         |
| DJ694  | 2.1 | ♀   | 5                | 119 | 62.2 | 82               | 118  | 72.3 | 90               | 120        | 68.5 | 82               | 0.0         | 0.0              |         |
| DJ694  | 2.1 | ♀   | 6                | 121 | 57.2 | 70               | 115  | 69.3 | 81               | 120        | 67.4 | 77               | 0.0         | 0.0              |         |
| DJ694  | 2.1 | ♂   | 1                | 117 | 49.4 | 75               | 111  | 51.3 | 64               | 119        | 61.0 | 75               | 19.0        | 0.0              | <0.0001 |
| DJ694  | 2.1 | ♂   | 2                | 113 | 52.3 | 63               | 113  | 66.0 | 74               | 115        | 60.6 | 74               | 0.0         | 0.0              |         |
| DJ694  | 2.1 | ♂   | 3                | 121 | 53.5 | 68               | 121  | 58.2 | 68               | 120        | 54.8 | 72               | 0.0         | 5.9              |         |
| DJ694  | 2.1 | ♂   | 4                | 119 | 51.5 | 64               | 122  | 60.9 | 78               | 119        | 57.0 | 71               | 0.0         | 0.0              |         |
| DJ694  | 2.1 | ♂   | 5                | 119 | 47.9 | 61               | 119  | 60.0 | 74               | 118        | 57.2 | 71               | 0.0         | 0.0              |         |
| DJ694  | 2.1 | ♂   | 6                | 122 | 51.8 | 70               | 121  | 62.6 | 77               | 121        | 56.0 | 63               | 0.0         | -10.0            |         |
| DJ694  | 4.3 | ♀   | 1                | 121 | 53.9 | 66               | 118  | 80.7 | 101              | 123        | 71.3 | 85               | 0.0         | 0.0              |         |
| DJ694  | 4.3 | ♀   | 2                | 111 | 54.2 | 69               | 90   | 75.2 | 97               | 109        | 72.3 | 84               | 0.0         | 0.0              |         |
| DJ694  | 4.3 | ♀   | 3                | 119 | 47.4 | 58               | 119  | 74.0 | 83               | 116        | 58.6 | 68               | 0.0         | 0.0              |         |
| DJ694  | 4.3 | ♀   | 4                | 114 | 42.4 | 57               | 117  | 68.3 | 82               | 120        | 52.8 | 71               | 0.0         | 0.0              |         |
| DJ694  | 4.3 | ♀   | 5                | 120 | 44.4 | 57               | 118  | 72.3 | 90               | 118        | 59.0 | 71               | 0.0         | 0.0              |         |
| DJ694  | 4.3 | ♀   | 6                | 115 | 41.5 | 59               | 115  | 69.3 | 81               | 118        | 55.0 | 77               | 0.0         | 0.0              |         |
| DJ694  | 4.3 | ♂   | 1                | 120 | 48.0 | 59               | 114  | 75.5 | 91               | 114        | 49.1 | 63               | 0.0         | 0.0              |         |
| DJ694  | 4.3 | ♂   | 2                | 120 | 48.2 | 63               | 105  | 74.6 | 97               | 116        | 51.7 | 65               | 0.0         | 0.0              |         |
| DJ694  | 4.3 | ♂   | 3                | 122 | 34.0 | 44               | 121  | 58.2 | 68               | 120        | 42.2 | 51               | 0.0         | 0.0              |         |
| DJ694  | 4.3 | ♂   | 4                | 111 | 36.6 | 50               | 122  | 60.9 | 78               | 120        | 39.9 | 50               | 0.0         | 0.0              |         |
| DJ694  | 4.3 | ♂   | 5                | 113 | 32.1 | 40               | 119  | 60.0 | 74               | 123        | 39.4 | 43               | 0.0         | 0.0              |         |
| DJ694  | 4.3 | ♂   | 6                | 125 | 35.5 | 49               | 121  | 62.6 | 77               | 120        | 41.8 | 49               | 0.0         | 0.0              |         |
| DJ694  | 9.1 | ♀   | 1                | 118 | 52.5 | 68               | 119  | 74.0 | 83               | 127        | 63.6 | 83               | 0.0         | 0.0              |         |
| DJ694  | 9.1 | ♀   | 2                | 113 | 47.6 | 67               | 117  | 68.3 | 82               | 123        | 59.4 | 78               | 0.0         | 0.0              |         |
| DJ694  | 9.1 | ♀   | 3                | 120 | 49.8 | 67               | 118  | 72.3 | 90               | 118        | 56.5 | 82               | 0.0         | 0.0              |         |
| DJ694  | 9.1 | ♀   | 4                | 111 | 47.5 | 66               | 115  | 69.3 | 81               | 115        | 60.9 | 77               | 0.0         | 0.0              |         |

Table S3

| Gal4  | UAS  | Sex | Rep <sup>1</sup> | UAS |      |                  | Gal4 |      |                  | Gal4 + UAS |      |                  | % Extension |                  | P       |
|-------|------|-----|------------------|-----|------|------------------|------|------|------------------|------------|------|------------------|-------------|------------------|---------|
|       |      |     |                  | n   | Mean | Max <sup>2</sup> | n    | Mean | Max <sup>2</sup> | n          | Mean | Max <sup>2</sup> | Mean        | Max <sup>2</sup> |         |
| DJ694 | 9.1  | ♂   | 1                | 118 | 46.8 | 58               | 121  | 58.2 | 68               | 118        | 53.4 | 65               | 0.0         | 0.0              |         |
| DJ694 | 9.1  | ♂   | 2                | 120 | 45.3 | 57               | 122  | 60.9 | 78               | 121        | 52.0 | 61               | 0.0         | 0.0              |         |
| DJ694 | 9.1  | ♂   | 3                | 119 | 39.1 | 50               | 119  | 60.0 | 74               | 122        | 51.0 | 57               | 0.0         | 0.0              |         |
| DJ694 | 9.1  | ♂   | 4                | 123 | 44.9 | 56               | 121  | 62.6 | 77               | 120        | 49.0 | 59               | 0.0         | 0.0              |         |
| DJ694 | 3.2  | ♀   | 1                | 118 | 70.5 | 93               | 118  | 64.3 | 84               | 120        | 82.6 | 97               | 17.2        | 4.3              | <0.0001 |
| DJ694 | 3.2  | ♀   | 2                | 117 | 74.2 | 101              | 118  | 61.8 | 81               | 119        | 87.6 | 101              | 18.1        | 0.0              | 0.0001  |
| DJ694 | 3.2  | ♀   | 3                | 128 | 67.6 | 83               | 119  | 74.0 | 83               | 117        | 75.4 | 83               | 1.9         | 0.0              | 0.8979  |
| DJ694 | 3.2  | ♀   | 4                | 124 | 62.9 | 78               | 117  | 68.3 | 82               | 118        | 69.1 | 82               | 1.2         | 0.0              | 0.1114  |
| DJ694 | 3.2  | ♀   | 5                | 119 | 60.7 | 74               | 118  | 72.3 | 90               | 118        | 69.7 | 82               | 0.0         | 0.0              |         |
| DJ694 | 3.2  | ♀   | 6                | 120 | 60.3 | 81               | 115  | 69.3 | 81               | 121        | 68.1 | 85               | 0.0         | 4.9              |         |
| DJ694 | 3.2  | ♂   | 1                | 116 | 62.4 | 84               | 118  | 54.4 | 69               | 117        | 74.1 | 91               | 18.8        | 8.3              | <0.0001 |
| DJ694 | 3.2  | ♂   | 2                | 103 | 63.5 | 88               | 119  | 54.5 | 66               | 117        | 85.4 | 94               | 34.5        | 6.8              | <0.0001 |
| DJ694 | 3.2  | ♂   | 3                | 120 | 53.0 | 68               | 121  | 58.2 | 68               | 119        | 64.9 | 83               | 11.5        | 22.1             | <0.0001 |
| DJ694 | 3.2  | ♂   | 4                | 123 | 58.6 | 74               | 122  | 60.9 | 78               | 124        | 64.2 | 74               | 5.5         | 0.0              | 0.0851  |
| DJ694 | 3.2  | ♂   | 5                | 120 | 53.6 | 61               | 119  | 60.0 | 74               | 121        | 61.9 | 82               | 3.1         | 10.8             | 0.0987  |
| DJ694 | 3.2  | ♂   | 6                | 126 | 64.4 | 81               | 121  | 62.6 | 77               | 121        | 66.2 | 85               | 2.7         | 4.9              | 0.5922  |
| DJ694 | 10.1 | ♀   | 1                | 119 | 70.0 | 83               | 119  | 74.0 | 83               | 119        | 79.6 | 91               | 7.6         | 9.6              | <0.0001 |
| DJ694 | 10.1 | ♀   | 2                | 121 | 65.9 | 82               | 117  | 68.3 | 82               | 121        | 72.8 | 82               | 6.5         | 0.0              | 0.1117  |
| DJ694 | 10.1 | ♀   | 3                | 118 | 62.7 | 82               | 118  | 72.3 | 90               | 118        | 75.0 | 82               | 3.7         | 0.0              | 0.7199  |
| DJ694 | 10.1 | ♀   | 4                | 120 | 67.8 | 85               | 115  | 69.3 | 81               | 123        | 72.8 | 81               | 5.0         | 0.0              | 0.0290  |
| DJ694 | 10.1 | ♂   | 1                | 120 | 58.2 | 72               | 121  | 58.2 | 68               | 119        | 70.3 | 83               | 20.8        | 15.3             | <0.0001 |
| DJ694 | 10.1 | ♂   | 2                | 118 | 59.6 | 78               | 122  | 60.9 | 78               | 121        | 70.7 | 82               | 16.2        | 5.1              | <0.0001 |
| DJ694 | 10.1 | ♂   | 3                | 125 | 58.4 | 71               | 119  | 60.0 | 74               | 113        | 69.9 | 82               | 16.4        | 10.8             | <0.0001 |
| DJ694 | 10.1 | ♂   | 4                | 124 | 64.9 | 81               | 121  | 62.6 | 77               | 122        | 71.2 | 85               | 9.6         | 4.9              | <0.0001 |
| DJ694 | 3.1  | ♀   | 1                | 117 | 60.5 | 87               | 116  | 59.7 | 84               | 119        | 68.5 | 91               | 13.3        | 4.6              | 0.0029  |
| DJ694 | 3.1  | ♀   | 2                | 113 | 63.8 | 87               | 119  | 72.2 | 91               | 120        | 71.4 | 94               | 0.0         | 3.3              |         |
| DJ694 | 3.1  | ♀   | 3                | 118 | 83.7 | 106              | 118  | 80.7 | 101              | 117        | 77.7 | 98               | -3.7        | -3.0             | 0.1472  |
| DJ694 | 3.1  | ♀   | 4                | 120 | 78.2 | 105              | 90   | 75.2 | 97               | 121        | 76.0 | 93               | 0.0         | -4.1             |         |
| DJ694 | 3.1  | ♀   | 5                | 119 | 61.2 | 72               | 119  | 74.0 | 83               | 116        | 67.4 | 83               | 0.0         | 0.0              |         |
| DJ694 | 3.1  | ♀   | 6                | 107 | 50.4 | 67               | 117  | 68.3 | 82               | 120        | 55.8 | 71               | 0.0         | 0.0              |         |
| DJ694 | 3.1  | ♀   | 7                | 112 | 51.7 | 67               | 118  | 72.3 | 90               | 121        | 60.8 | 82               | 0.0         | 0.0              |         |
| DJ694 | 3.1  | ♀   | 8                | 119 | 57.2 | 77               | 115  | 69.3 | 81               | 121        | 58.3 | 70               | 0.0         | -9.1             |         |
| DJ694 | 3.1  | ♂   | 1                | 116 | 48.6 | 78               | 119  | 54.7 | 71               | 118        | 59.1 | 84               | 8.1         | 7.7              | 0.0004  |
| DJ694 | 3.1  | ♂   | 2                | 115 | 45.6 | 57               | 116  | 63.3 | 84               | 119        | 70.5 | 100              | 11.4        | 19.0             | <0.0001 |
| DJ694 | 3.1  | ♂   | 3                | 116 | 72.8 | 98               | 114  | 75.5 | 91               | 111        | 70.7 | 85               | -2.9        | -6.6             | 0.0170  |
| DJ694 | 3.1  | ♂   | 4                | 121 | 67.8 | 87               | 105  | 74.6 | 97               | 122        | 77.0 | 97               | 3.3         | 0.0              | 0.0711  |
| DJ694 | 3.1  | ♂   | 5                | 120 | 62.7 | 72               | 121  | 58.2 | 68               | 118        | 61.5 | 75               | 0.0         | 4.2              |         |
| DJ694 | 3.1  | ♂   | 6                | 123 | 52.7 | 67               | 122  | 60.9 | 78               | 121        | 56.9 | 78               | 0.0         | 0.0              |         |
| DJ694 | 3.1  | ♂   | 7                | 119 | 50.6 | 64               | 119  | 60.0 | 74               | 119        | 61.0 | 71               | 1.6         | 0.0              | 0.2226  |
| DJ694 | 3.1  | ♂   | 8                | 126 | 50.9 | 70               | 121  | 62.6 | 77               | 118        | 61.3 | 81               | 0.0         | 5.2              |         |
| DJ694 | 4.4  | ♀   | 1                | 119 | 51.8 | 75               | 119  | 74.0 | 83               | 122        | 65.4 | 83               | 0.0         | 0.0              |         |
| DJ694 | 4.4  | ♀   | 2                | 117 | 48.4 | 71               | 117  | 68.3 | 82               | 122        | 60.5 | 82               | 0.0         | 0.0              |         |
| DJ694 | 4.4  | ♀   | 3                | 118 | 45.5 | 64               | 118  | 72.3 | 90               | 118        | 62.0 | 82               | 0.0         | 0.0              |         |
| DJ694 | 4.4  | ♀   | 4                | 113 | 46.1 | 66               | 115  | 69.3 | 81               | 120        | 61.7 | 81               | 0.0         | 0.0              |         |
| DJ694 | 4.4  | ♂   | 1                | 121 | 44.1 | 61               | 121  | 58.2 | 68               | 124        | 53.2 | 65               | 0.0         | 0.0              |         |
| DJ694 | 4.4  | ♂   | 2                | 121 | 49.7 | 61               | 122  | 60.9 | 78               | 120        | 55.8 | 71               | 0.0         | 0.0              |         |
| DJ694 | 4.4  | ♂   | 3                | 116 | 45.1 | 57               | 119  | 60.0 | 74               | 123        | 53.0 | 61               | 0.0         | 0.0              |         |
| DJ694 | 4.4  | ♂   | 4                | 118 | 49.9 | 63               | 121  | 62.6 | 77               | 120        | 59.5 | 77               | 0.0         | 0.0              |         |
| D42   | 2.1  | ♀   | 1                | 115 | 55.4 | 78               | 103  | 73.0 | 95               | 120        | 75.7 | 88               | 3.7         | 0.0              | 0.0934  |
| D42   | 2.1  | ♀   | 2                | 114 | 66.2 | 94               | 100  | 76.2 | 97               | 119        | 85.5 | 97               | 12.2        | 0.0              | 0.3860  |
| D42   | 2.1  | ♀   | 3                | 116 | 71.2 | 92               | 104  | 59.1 | 92               | 107        | 76.4 | 92               | 7.4         | 0.0              | <0.0001 |
| D42   | 2.1  | ♀   | 4                | 121 | 73.9 | 90               | 101  | 61.1 | 94               | 118        | 84.5 | 104              | 14.4        | 10.6             | <0.0001 |

Table S3

| Gal4 | UAS | Sex | Rep <sup>1</sup> | UAS |      |                  | Gal4 |      |                  | Gal4 + UAS |      |                  | % Extension |                  | P                 |
|------|-----|-----|------------------|-----|------|------------------|------|------|------------------|------------|------|------------------|-------------|------------------|-------------------|
|      |     |     |                  | n   | Mean | Max <sup>2</sup> | n    | Mean | Max <sup>2</sup> | n          | Mean | Max <sup>2</sup> | Mean        | Max <sup>2</sup> |                   |
| D42  | 2.1 | ♀   | 5                | 118 | 71.4 | 87               | 117  | 61.9 | 84               | 110        | 64.4 | 84               | 0.0         | 0.0              |                   |
| D42  | 2.1 | ♀   | 6                | 117 | 64.4 | 72               | 114  | 67.1 | 90               | 116        | 64.2 | 83               | -0.3        | 0.0              | 0.0644            |
| D42  | 2.1 | ♀   | 7                | 116 | 62.2 | 76               | 125  | 63.7 | 83               | 129        | 67.8 | 83               | 6.5         | 0.0              | 0.3398            |
| D42  | 2.1 | ♀   | 8                | 116 | 66.4 | 82               | 117  | 64.7 | 75               | 117        | 65.5 | 82               | 0.0         | 0.0              |                   |
| D42  | 2.1 | ♂   | 1                | 117 | 49.4 | 75               | 103  | 50.3 | 68               | 112        | 53.9 | 71               | 7.1         | 0.0              | 0.1028            |
| D42  | 2.1 | ♂   | 2                | 113 | 52.3 | 63               | 109  | 53.4 | 94               | 117        | 58.0 | 74               | 8.6         | 0.0              | 0.1147            |
| D42  | 2.1 | ♂   | 3                | 117 | 56.0 | 71               | 108  | 54.2 | 78               | 125        | 60.4 | 78               | 7.7         | 0.0              | <b>0.0038</b>     |
| D42  | 2.1 | ♂   | 4                | 115 | 67.0 | 87               | 111  | 63.2 | 84               | 122        | 66.3 | 84               | 0.0         | 0.0              |                   |
| D42  | 2.1 | ♂   | 5                | 116 | 61.3 | 77               | 124  | 61.5 | 70               | 108        | 57.1 | 70               | -7.0        | 0.0              | <b>&lt;0.0001</b> |
| D42  | 2.1 | ♂   | 6                | 125 | 61.3 | 76               | 117  | 61.9 | 76               | 102        | 55.7 | 72               | -9.1        | -5.3             | <b>&lt;0.0001</b> |
| D42  | 2.1 | ♂   | 7                | 114 | 61.1 | 76               | 120  | 58.7 | 76               | 114        | 57.6 | 72               | -1.9        | -5.3             | 0.2165            |
| D42  | 2.1 | ♂   | 8                | 126 | 55.7 | 71               | 120  | 59.8 | 68               | 112        | 56.1 | 68               | 0.0         | 0.0              |                   |
| D42  | 4.3 | ♀   | 1                | 121 | 53.9 | 66               | 120  | 82.1 | 98               | 116        | 80.1 | 98               | 0.0         | 0.0              |                   |
| D42  | 4.3 | ♀   | 2                | 111 | 54.2 | 69               | 99   | 78.7 | 97               | 120        | 77.7 | 97               | 0.0         | 0.0              |                   |
| D42  | 4.3 | ♀   | 3                | 119 | 51.2 | 74               | 104  | 59.1 | 92               | 123        | 66.8 | 88               | 13.0        | 0.0              | 0.5597            |
| D42  | 4.3 | ♀   | 4                | 112 | 57.1 | 80               | 101  | 61.1 | 94               | 93         | 67.7 | 90               | 10.7        | 0.0              | <b>0.0002</b>     |
| D42  | 4.3 | ♀   | 5                | 119 | 51.4 | 63               | 117  | 61.9 | 84               | 110        | 58.3 | 70               | 0.0         | 0.0              |                   |
| D42  | 4.3 | ♀   | 6                | 120 | 50.1 | 65               | 114  | 67.1 | 90               | 119        | 58.3 | 72               | 0.0         | 0.0              |                   |
| D42  | 4.3 | ♀   | 7                | 113 | 47.8 | 58               | 125  | 63.7 | 83               | 116        | 58.6 | 76               | 0.0         | 0.0              |                   |
| D42  | 4.3 | ♀   | 8                | 120 | 49.1 | 64               | 117  | 64.7 | 75               | 116        | 57.1 | 75               | 0.0         | 0.0              |                   |
| D42  | 4.3 | ♂   | 1                | 120 | 48.0 | 59               | 113  | 67.6 | 98               | 113        | 38.3 | 50               | -20.1       | -15.3            | <b>&lt;0.0001</b> |
| D42  | 4.3 | ♂   | 2                | 120 | 48.2 | 63               | 118  | 66.4 | 93               | 106        | 35.9 | 45               | -25.4       | -28.6            | <b>&lt;0.0001</b> |
| D42  | 4.3 | ♂   | 3                | 121 | 46.3 | 57               | 108  | 54.2 | 78               | 122        | 45.3 | 60               | -2.2        | 0.0              | 0.9349            |
| D42  | 4.3 | ♂   | 4                | 95  | 49.5 | 59               | 111  | 63.2 | 84               | 106        | 41.1 | 66               | -17.0       | 0.0              | <b>0.0001</b>     |
| D42  | 4.3 | ♂   | 5                | 124 | 47.8 | 56               | 124  | 61.5 | 70               | 114        | 51.6 | 70               | 0.0         | 0.0              |                   |
| D42  | 4.3 | ♂   | 6                | 122 | 41.7 | 55               | 117  | 61.9 | 76               | 117        | 42.7 | 55               | 0.0         | 0.0              |                   |
| D42  | 4.3 | ♂   | 7                | 119 | 40.5 | 55               | 120  | 58.7 | 76               | 109        | 43.5 | 55               | 0.0         | 0.0              |                   |
| D42  | 4.3 | ♂   | 8                | 119 | 34.4 | 44               | 120  | 59.8 | 68               | 110        | 38.9 | 54               | 0.0         | 0.0              |                   |
| D42  | 9.1 | ♀   | 1                | 129 | 57.1 | 81               | 104  | 59.1 | 92               | 116        | 62.8 | 95               | 6.2         | 3.3              | 0.592             |
| D42  | 9.1 | ♀   | 2                | 115 | 70.6 | 90               | 101  | 61.1 | 94               | 117        | 84.2 | 101              | 19.3        | 7.4              | <b>&lt;0.0001</b> |
| D42  | 9.1 | ♀   | 3                | 120 | 54.8 | 77               | 117  | 61.9 | 84               | 115        | 64.3 | 77               | 3.9         | 0.0              | 0.1598            |
| D42  | 9.1 | ♀   | 4                | 115 | 49.7 | 62               | 114  | 67.1 | 90               | 118        | 58.7 | 72               | 0.0         | 0.0              |                   |
| D42  | 9.1 | ♀   | 5                | 118 | 55.9 | 69               | 125  | 63.7 | 83               | 122        | 60.3 | 76               | 0.0         | 0.0              |                   |
| D42  | 9.1 | ♀   | 6                | 118 | 51.5 | 68               | 117  | 64.7 | 75               | 119        | 55.7 | 75               | 0.0         | 0.0              |                   |
| D42  | 9.1 | ♂   | 1                | 124 | 43.1 | 57               | 108  | 54.2 | 78               | 120        | 51.8 | 71               | 0.0         | 0.0              |                   |
| D42  | 9.1 | ♂   | 2                | 123 | 53.9 | 73               | 111  | 63.2 | 84               | 121        | 69.2 | 90               | 9.5         | 7.1              | 0.1051            |
| D42  | 9.1 | ♂   | 3                | 120 | 48.5 | 59               | 124  | 61.5 | 70               | 115        | 55.6 | 66               | 0.0         | 0.0              |                   |
| D42  | 9.1 | ♂   | 4                | 109 | 45.4 | 58               | 117  | 61.9 | 76               | 111        | 51.3 | 65               | 0.0         | 0.0              |                   |
| D42  | 9.1 | ♂   | 5                | 116 | 44.2 | 55               | 120  | 58.7 | 76               | 120        | 51.9 | 62               | 0.0         | 0.0              |                   |
| D42  | 9.1 | ♂   | 6                | 121 | 47.8 | 61               | 120  | 59.8 | 68               | 120        | 48.5 | 61               | 0.0         | 0.0              |                   |
| D42  | 3.2 | ♀   | 1                | 118 | 70.5 | 93               | 119  | 63.4 | 84               | 112        | 81.2 | 91               | 15.2        | 0.0              | <b>0.0013</b>     |
| D42  | 3.2 | ♀   | 2                | 117 | 74.2 | 101              | 120  | 66.0 | 88               | 118        | 83.0 | 94               | 11.9        | 0.0              | 0.7125            |
| D42  | 3.2 | ♀   | 3                | 122 | 70.3 | 84               | 117  | 61.9 | 84               | 100        | 69.4 | 84               | 0.0         | 0.0              |                   |
| D42  | 3.2 | ♀   | 4                | 116 | 60.1 | 72               | 114  | 67.1 | 90               | 119        | 70.4 | 83               | 5.0         | 0.0              | 0.4230            |
| D42  | 3.2 | ♀   | 5                | 116 | 62.0 | 83               | 125  | 63.7 | 83               | 122        | 68.1 | 83               | 7.0         | 0.0              | 0.8400            |
| D42  | 3.2 | ♀   | 6                | 119 | 62.0 | 75               | 117  | 64.7 | 75               | 119        | 62.6 | 75               | 0.0         | 0.0              |                   |
| D42  | 3.2 | ♂   | 1                | 116 | 62.4 | 84               | 120  | 56.0 | 69               | 116        | 77.3 | 91               | 24.0        | 8.3              | <b>&lt;0.0001</b> |
| D42  | 3.2 | ♂   | 2                | 103 | 63.5 | 88               | 115  | 57.7 | 73               | 119        | 79.4 | 94               | 25.0        | 6.8              | <b>&lt;0.0001</b> |
| D42  | 3.2 | ♂   | 3                | 120 | 58.0 | 70               | 124  | 61.5 | 70               | 101        | 61.7 | 77               | 0.4         | 10.0             | 0.4165            |
| D42  | 3.2 | ♂   | 4                | 120 | 55.5 | 69               | 117  | 61.9 | 76               | 125        | 65.2 | 83               | 5.2         | 9.2              | <b>&lt;0.0001</b> |
| D42  | 3.2 | ♂   | 5                | 125 | 53.7 | 69               | 120  | 58.7 | 76               | 114        | 57.0 | 76               | 0.0         | 0.0              |                   |
| D42  | 3.2 | ♂   | 6                | 117 | 57.1 | 71               | 120  | 59.8 | 68               | 126        | 63.9 | 75               | 6.9         | 5.6              | <b>&lt;0.0001</b> |

| Gal4 | UAS  | Sex | Rep <sup>1</sup> | UAS |      |                  | Gal4 |      |                  | Gal4 + UAS |      |                  | % Extension |                  | P                 |
|------|------|-----|------------------|-----|------|------------------|------|------|------------------|------------|------|------------------|-------------|------------------|-------------------|
|      |      |     |                  | n   | Mean | Max <sup>2</sup> | n    | Mean | Max <sup>2</sup> | n          | Mean | Max <sup>2</sup> | Mean        | Max <sup>2</sup> |                   |
| D42  | 10.1 | ♀   | 1                | 120 | 57.6 | 77               | 106  | 77.9 | 95               | 116        | 78.9 | 88               | 1.2         | 0.0              | <b>0.0114</b>     |
| D42  | 10.1 | ♀   | 2                | 109 | 66.6 | 84               | 106  | 74.0 | 91               | 110        | 71.6 | 88               | 0.0         | 0.0              |                   |
| D42  | 10.1 | ♀   | 3                | 119 | 68.5 | 84               | 117  | 61.9 | 84               | 115        | 67.8 | 84               | 0.0         | 0.0              |                   |
| D42  | 10.1 | ♀   | 4                | 105 | 66.8 | 86               | 114  | 67.1 | 90               | 117        | 70.2 | 90               | 4.6         | 0.0              |                   |
| D42  | 10.1 | ♀   | 5                | 123 | 63.9 | 83               | 125  | 63.7 | 83               | 114        | 59.4 | 76               | -6.8        | -8.4             |                   |
| D42  | 10.1 | ♀   | 6                | 124 | 59.5 | 75               | 117  | 64.7 | 75               | 110        | 65.6 | 89               | 1.3         | 18.7             |                   |
| D42  | 10.1 | ♂   | 1                | 121 | 57.2 | 74               | 119  | 59.2 | 81               | 115        | 67.9 | 81               | 14.6        | 0.0              | <b>0.0053</b>     |
| D42  | 10.1 | ♂   | 2                | 124 | 56.8 | 67               | 116  | 60.4 | 88               | 123        | 68.7 | 81               | 13.8        | 0.0              | 0.0531            |
| D42  | 10.1 | ♂   | 3                | 120 | 66.4 | 77               | 124  | 61.5 | 70               | 117        | 71.1 | 84               | 7.1         | 9.1              | <b>&lt;0.0001</b> |
| D42  | 10.1 | ♂   | 4                | 122 | 65.1 | 86               | 117  | 61.9 | 76               | 109        | 75.7 | 98               | 16.4        | 14.0             | <b>&lt;0.0001</b> |
| D42  | 10.1 | ♂   | 5                | 115 | 59.2 | 76               | 120  | 58.7 | 76               | 117        | 61.3 | 76               | 3.5         | 0.0              | 0.3541            |
| D42  | 10.1 | ♂   | 6                | 127 | 62.7 | 89               | 120  | 59.8 | 68               | 115        | 68.3 | 82               | 8.9         | 0.0              | <b>0.0116</b>     |
| D42  | 3.1  | ♀   | 1                | 117 | 60.5 | 87               | 117  | 66.9 | 87               | 119        | 74.4 | 91               | 11.2        | 4.6              | <b>&lt;0.0001</b> |
| D42  | 3.1  | ♀   | 2                | 113 | 63.8 | 87               | 112  | 74.0 | 97               | 120        | 79.4 | 100              | 7.3         | 3.1              | 0.0642            |
| D42  | 3.1  | ♀   | 3                | 118 | 83.7 | 106              | 120  | 82.1 | 98               | 119        | 89.0 | 106              | 6.4         | 0.0              | 0.6531            |
| D42  | 3.1  | ♀   | 4                | 120 | 78.2 | 105              | 99   | 78.7 | 97               | 114        | 84.7 | 97               | 7.5         | 0.0              | <b>0.0105</b>     |
| D42  | 3.1  | ♀   | 5                | 118 | 67.5 | 80               | 117  | 61.9 | 84               | 128        | 67.2 | 87               | 0.0         | 3.6              |                   |
| D42  | 3.1  | ♀   | 6                | 127 | 62.0 | 72               | 114  | 67.1 | 90               | 122        | 70.6 | 98               | 5.2         | 8.9              | <b>0.0095</b>     |
| D42  | 3.1  | ♀   | 7                | 125 | 61.8 | 76               | 125  | 63.7 | 83               | 119        | 71.6 | 83               | 12.5        | 0.0              | <b>0.0225</b>     |
| D42  | 3.1  | ♀   | 8                | 110 | 59.2 | 75               | 117  | 64.7 | 75               | 119        | 69.3 | 89               | 7.1         | 18.7             | <b>0.0003</b>     |
| D42  | 3.1  | ♂   | 1                | 116 | 48.6 | 78               | 120  | 55.2 | 74               | 118        | 54.2 | 68               | 0.0         | -8.1             |                   |
| D42  | 3.1  | ♂   | 2                | 115 | 45.6 | 57               | 115  | 60.7 | 73               | 118        | 66.0 | 91               | 8.7         | 24.7             | <b>&lt;0.0001</b> |
| D42  | 3.1  | ♂   | 3                | 116 | 72.8 | 98               | 113  | 67.6 | 98               | 113        | 66.5 | 77               | -1.6        | -21.4            | 0.1023            |
| D42  | 3.1  | ♂   | 4                | 121 | 67.8 | 87               | 118  | 66.4 | 93               | 104        | 69.0 | 84               | 1.6         | -3.4             | 0.8434            |
| D42  | 3.1  | ♂   | 5                | 108 | 60.4 | 70               | 124  | 61.5 | 70               | 120        | 58.1 | 73               | -3.9        | 4.3              | <b>0.0055</b>     |
| D42  | 3.1  | ♂   | 6                | 125 | 61.2 | 76               | 117  | 61.9 | 76               | 117        | 62.4 | 76               | 0.7         | 0.0              | 0.2374            |
| D42  | 3.1  | ♂   | 7                | 117 | 59.7 | 76               | 120  | 58.7 | 76               | 120        | 58.6 | 72               | -0.1        | -5.3             | 0.3712            |
| D42  | 3.1  | ♂   | 8                | 118 | 56.1 | 75               | 120  | 59.8 | 68               | 113        | 60.1 | 75               | 0.5         | 0.0              | <b>0.0246</b>     |
| D42  | 4.4  | ♀   | 1                | 117 | 59.8 | 88               | 104  | 59.1 | 92               | 115        | 75.0 | 99               | 25.4        | 7.6              | <b>&lt;0.0001</b> |
| D42  | 4.4  | ♀   | 2                | 115 | 67.8 | 97               | 101  | 61.1 | 94               | 105        | 80.6 | 104              | 18.9        | 7.2              | <b>&lt;0.0001</b> |
| D42  | 4.4  | ♀   | 3                | 137 | 61.8 | 77               | 117  | 61.9 | 84               | 117        | 60.4 | 87               | -2.2        | 3.6              | 0.9710            |
| D42  | 4.4  | ♀   | 4                | 119 | 53.9 | 69               | 114  | 67.1 | 90               | 117        | 63.1 | 83               | 0.0         | 0.0              |                   |
| D42  | 4.4  | ♀   | 5                | 127 | 56.3 | 76               | 125  | 63.7 | 83               | 118        | 58.2 | 76               | 0.0         | 0.0              |                   |
| D42  | 4.4  | ♀   | 6                | 123 | 56.6 | 75               | 117  | 64.7 | 75               | 109        | 62.0 | 82               | 0.0         | 9.3              |                   |
| D42  | 4.4  | ♂   | 1                | 123 | 54.7 | 78               | 108  | 54.2 | 78               | 125        | 65.2 | 85               | 19.1        | 9.0              | <b>&lt;0.0001</b> |
| D42  | 4.4  | ♂   | 2                | 120 | 68.5 | 84               | 111  | 63.2 | 84               | 123        | 70.8 | 90               | 3.4         | 7.1              | <b>0.0278</b>     |
| D42  | 4.4  | ♂   | 3                | 113 | 55.0 | 70               | 124  | 61.5 | 70               | 112        | 54.7 | 70               | -0.6        | 0.0              | 0.5016            |
| D42  | 4.4  | ♂   | 4                | 109 | 52.3 | 69               | 117  | 61.9 | 76               | 119        | 50.8 | 69               | -2.9        | 0.0              | 0.2690            |
| D42  | 4.4  | ♂   | 5                | 117 | 52.6 | 69               | 120  | 58.7 | 76               | 116        | 56.5 | 76               | 0.0         | 0.0              |                   |
| D42  | 4.4  | ♂   | 6                | 121 | 53.0 | 68               | 120  | 59.8 | 68               | 109        | 53.3 | 68               | 0.0         | 0.0              |                   |

**Table S3: Longevity data and analysis of Hsp70 overexpression.** Mean: average survival in days, n: number of flies in the replicate, P: highest Log-rank test value, 1: replicate number, 2: 95% mortality (maximum lifespan)
