# Supplementary material
Source: publisher figshare collection journal article supplement (https://gsajournals.figshare.com/articles/dataset/_/9916223)
Supplement: Supplementary file [file 1]

Table S2

| Stress | Age | Gal4   | UAS  | Sex | Rep <sup>1</sup> | UAS |      |                  | Gal4 |      |                  | Gal4 + UAS |      |                  | % Extension |                  | P                 |
|--------|-----|--------|------|-----|------------------|-----|------|------------------|------|------|------------------|------------|------|------------------|-------------|------------------|-------------------|
|        |     |        |      |     |                  | n   | Mean | Max <sup>2</sup> | n    | Mean | Max <sup>2</sup> | n          | Mean | Max <sup>2</sup> | Mean        | Max <sup>2</sup> |                   |
| Heat   | 3   | daGal4 | 2.1  | ♀   | 1                | 37  | 72.0 | 84               | 39   | 61.7 | 84               | 39         | 63.8 | 93               | 0.0         | 10.7             |                   |
| Heat   | 3   | daGal4 | 2.1  | ♀   | 2                | 41  | 64.9 | 76               | 39   | 60.1 | 84               | 40         | 60.6 | 84               | 0.0         | 0.0              |                   |
| Heat   | 3   | daGal4 | 2.1  | ♀   | 3                | 42  | 59.0 | 76               | 38   | 54.1 | 76               | 39         | 59.7 | 76               | 1.3         | 0.0              | <b>0.0048</b>     |
| Heat   | 3   | daGal4 | 2.1  | ♀   | 4                | 40  | 24.9 | 41               | 40   | 22.3 | 41               | 40         | 27.8 | 45               | 11.9        | 9.8              | <b>0.0139</b>     |
| Heat   | 3   | daGal4 | 2.1  | ♂   | 1                | 38  | 61.4 | 84               | 39   | 60.8 | 84               | 40         | 57.8 | 76               | -5.0        | -9.5             | 0.0974            |
| Heat   | 3   | daGal4 | 2.1  | ♂   | 2                | 40  | 58.9 | 68               | 38   | 53.9 | 84               | 40         | 52.5 | 68               | -2.6        | 0.0              | <b>0.0082</b>     |
| Heat   | 3   | daGal4 | 2.1  | ♂   | 3                | 40  | 51.4 | 76               | 38   | 52.9 | 76               | 40         | 53.0 | 76               | 0.1         | 0.0              | 0.6036            |
| Heat   | 3   | daGal4 | 2.1  | ♂   | 4                | 40  | 23.5 | 34               | 40   | 23.6 | 45               | 40         | 25.8 | 41               | 9.7         | 0.0              | 0.1872            |
| Heat   | 3   | daGal4 | 4.3  | ♀   | 1                | 40  | 68.0 | 84               | 39   | 61.7 | 84               | 38         | 66.8 | 93               | 0.0         | 10.7             |                   |
| Heat   | 3   | daGal4 | 4.3  | ♀   | 2                | 40  | 60.7 | 76               | 39   | 60.1 | 84               | 39         | 56.3 | 68               | -6.3        | -10.5            | <b>0.0030</b>     |
| Heat   | 3   | daGal4 | 4.3  | ♀   | 3                | 41  | 51.1 | 56               | 38   | 54.1 | 76               | 38         | 57.9 | 76               | 7.0         | 0.0              | <b>0.0450</b>     |
| Heat   | 3   | daGal4 | 4.3  | ♀   | 4                | 39  | 28.1 | 36               | 40   | 27.9 | 36               | 40         | 33.6 | 46               | 19.5        | 27.8             | <b>0.0005</b>     |
| Heat   | 3   | daGal4 | 4.3  | ♂   | 1                | 41  | 63.7 | 76               | 39   | 60.8 | 84               | 45         | 58.6 | 76               | -3.7        | 0.0              | <b>0.0175</b>     |
| Heat   | 3   | daGal4 | 4.3  | ♂   | 2                | 42  | 55.5 | 76               | 38   | 53.9 | 84               | 46         | 51.3 | 64               | -4.8        | -15.8            | <b>0.0332</b>     |
| Heat   | 3   | daGal4 | 4.3  | ♂   | 3                | 41  | 51.9 | 76               | 38   | 52.9 | 76               | 40         | 52.1 | 68               | 0.0         | -10.5            |                   |
| Heat   | 3   | daGal4 | 4.3  | ♂   | 4                | 40  | 25.5 | 36               | 40   | 29.5 | 41               | 40         | 29.8 | 41               | 1.1         | 0.0              | <b>0.0017</b>     |
| Heat   | 3   | daGal4 | 9.1  | ♀   | 1                | 39  | 69.1 | 93               | 39   | 61.7 | 84               | 40         | 67.0 | 84               | 0.0         | 0.0              |                   |
| Heat   | 3   | daGal4 | 9.1  | ♀   | 2                | 41  | 61.6 | 76               | 39   | 60.1 | 84               | 38         | 65.7 | 76               | 6.7         | 0.0              | <b>0.0375</b>     |
| Heat   | 3   | daGal4 | 9.1  | ♀   | 3                | 43  | 60.7 | 76               | 38   | 54.1 | 76               | 39         | 62.2 | 84               | 2.3         | 10.5             | <b>0.0002</b>     |
| Heat   | 3   | daGal4 | 9.1  | ♂   | 1                | 39  | 68.7 | 84               | 39   | 60.8 | 84               | 38         | 69.7 | 93               | 1.5         | 10.7             | <b>0.0079</b>     |
| Heat   | 3   | daGal4 | 9.1  | ♂   | 2                | 40  | 57.7 | 76               | 38   | 53.9 | 84               | 34         | 60.8 | 76               | 5.4         | 0.0              | 0.1188            |
| Heat   | 3   | daGal4 | 9.1  | ♂   | 3                | 40  | 55.4 | 76               | 38   | 52.9 | 76               | 40         | 58.3 | 84               | 5.3         | 10.5             | <b>0.0352</b>     |
| Heat   | 3   | daGal4 | 3.2  | ♀   | 1                | 40  | 60.1 | 76               | 39   | 61.7 | 84               | 42         | 60.0 | 76               | -0.2        | 0.0              | 0.3989            |
| Heat   | 3   | daGal4 | 3.2  | ♀   | 2                | 39  | 52.8 | 68               | 39   | 60.1 | 84               | 38         | 61.8 | 76               | 2.8         | 0.0              | 0.6183            |
| Heat   | 3   | daGal4 | 3.2  | ♀   | 3                | 40  | 50.2 | 56               | 38   | 54.1 | 76               | 39         | 54.3 | 76               | 0.3         | 0.0              | <b>0.0010</b>     |
| Heat   | 3   | daGal4 | 3.2  | ♀   | 4                | 39  | 31.2 | 42               | 38   | 23.3 | 38               | 40         | 40.4 | 46               | 29.7        | 9.5              | <b>&lt;0.0001</b> |
| Heat   | 3   | daGal4 | 3.2  | ♂   | 1                | 40  | 60.1 | 93               | 39   | 60.8 | 84               | 39         | 58.2 | 76               | -3.2        | -9.5             | 0.3003            |
| Heat   | 3   | daGal4 | 3.2  | ♂   | 2                | 45  | 46.5 | 64               | 38   | 53.9 | 84               | 40         | 57.3 | 76               | 6.3         | 0.0              | 0.4225            |
| Heat   | 3   | daGal4 | 3.2  | ♂   | 3                | 40  | 47.4 | 60               | 38   | 52.9 | 76               | 40         | 49.4 | 76               | 0.0         | 0.0              |                   |
| Heat   | 3   | daGal4 | 3.2  | ♂   | 4                | 36  | 21.3 | 30               | 40   | 19.5 | 30               | 40         | 27.0 | 34               | 26.6        | 13.3             | <b>&lt;0.0001</b> |
| Heat   | 3   | daGal4 | 10.1 | ♀   | 1                | 40  | 61.5 | 84               | 39   | 61.7 | 84               | 40         | 61.5 | 76               | 0.0         | -9.5             |                   |
| Heat   | 3   | daGal4 | 10.1 | ♀   | 2                | 40  | 50.7 | 56               | 39   | 60.1 | 84               | 38         | 58.4 | 76               | 0.0         | 0.0              |                   |
| Heat   | 3   | daGal4 | 10.1 | ♀   | 3                | 40  | 50.4 | 56               | 38   | 54.1 | 76               | 40         | 63.5 | 93               | 17.3        | 22.4             | <b>&lt;0.0001</b> |
| Heat   | 3   | daGal4 | 10.1 | ♀   | 4                | 39  | 32.5 | 41               | 40   | 28.4 | 36               | 40         | 33.5 | 41               | 3.2         | 0.0              | 0.7430            |
| Heat   | 3   | daGal4 | 10.1 | ♂   | 1                | 29  | 61.8 | 84               | 39   | 60.8 | 84               | 40         | 60.4 | 84               | -0.7        | 0.0              | 0.4536            |
| Heat   | 3   | daGal4 | 10.1 | ♂   | 2                | 40  | 46.4 | 52               | 38   | 53.9 | 84               | 39         | 56.4 | 76               | 4.7         | 0.0              | 0.4541            |
| Heat   | 3   | daGal4 | 10.1 | ♂   | 3                | 39  | 48.3 | 60               | 38   | 52.9 | 76               | 39         | 53.9 | 76               | 1.9         | 0.0              | <b>0.0027</b>     |
| Heat   | 3   | daGal4 | 10.1 | ♂   | 4                | 40  | 26.2 | 36               | 40   | 22.0 | 26               | 40         | 28.8 | 36               | 9.9         | 0.0              | <b>0.0218</b>     |
| Heat   | 3   | daGal4 | 3.1  | ♀   | 1                | 40  | 59.0 | 76               | 39   | 61.7 | 84               | 43         | 58.0 | 76               | -1.8        | 0.0              | 0.0565            |
| Heat   | 3   | daGal4 | 3.1  | ♀   | 2                | 41  | 50.4 | 60               | 39   | 60.1 | 84               | 39         | 53.8 | 76               | 0.0         | 0.0              |                   |
| Heat   | 3   | daGal4 | 3.1  | ♀   | 3                | 38  | 46.2 | 56               | 38   | 54.1 | 76               | 41         | 52.0 | 64               | 0.0         | 0.0              |                   |
| Heat   | 3   | daGal4 | 3.1  | ♀   | 4                | 38  | 22.6 | 34               | 38   | 23.3 | 38               | 40         | 25.9 | 38               | 11.4        | 0.0              | <b>0.0067</b>     |
| Heat   | 3   | daGal4 | 3.1  | ♂   | 1                | 39  | 61.9 | 76               | 39   | 60.8 | 84               | 40         | 61.0 | 76               | 0.0         | 0.0              |                   |
| Heat   | 3   | daGal4 | 3.1  | ♂   | 2                | 40  | 42.6 | 56               | 38   | 53.9 | 84               | 40         | 54.9 | 76               | 1.9         | 0.0              | 0.9906            |
| Heat   | 3   | daGal4 | 3.1  | ♂   | 3                | 18  | 52.2 | 76               | 38   | 52.9 | 76               | 39         | 51.6 | 68               | -1.2        | -10.5            | 0.3324            |
| Heat   | 3   | daGal4 | 3.1  | ♂   | 4                | 40  | 16.5 | 26               | 40   | 19.5 | 30               | 40         | 20.1 | 26               | 2.8         | 0.0              | 0.4985            |
| Heat   | 3   | daGal4 | 4.4  | ♀   | 1                | 41  | 67.1 | 84               | 39   | 61.7 | 84               | 38         | 60.3 | 76               | -2.2        | -9.5             | <b>0.0014</b>     |
| Heat   | 3   | daGal4 | 4.4  | ♀   | 2                | 33  | 60.8 | 76               | 39   | 60.1 | 84               | 44         | 59.7 | 93               | -0.7        | 10.7             | 0.6783            |
| Heat   | 3   | daGal4 | 4.4  | ♀   | 3                | 40  | 59.3 | 76               | 38   | 54.1 | 76               | 40         | 55.6 | 76               | 0.0         | 0.0              |                   |

Table S2

| Stress | Age | Gal4   | UAS  | Sex | Rep <sup>1</sup> | UAS |      |                  | Gal4 |      |                  | Gal4 + UAS |      |                  | % Extension |                  | P                 |
|--------|-----|--------|------|-----|------------------|-----|------|------------------|------|------|------------------|------------|------|------------------|-------------|------------------|-------------------|
|        |     |        |      |     |                  | n   | Mean | Max <sup>2</sup> | n    | Mean | Max <sup>2</sup> | n          | Mean | Max <sup>2</sup> | Mean        | Max <sup>2</sup> |                   |
| Heat   | 3   | daGal4 | 4.4  | ♀   | 4                | 40  | 32.2 | 41               | 40   | 27.9 | 36               | 40         | 38.0 | 46               | 18.0        | 12.2             | <b>0.0002</b>     |
| Heat   | 3   | daGal4 | 4.4  | ♂   | 1                | 43  | 69.9 | 84               | 39   | 60.8 | 84               | 42         | 60.5 | 76               | -0.6        | -9.5             | 0.3669            |
| Heat   | 3   | daGal4 | 4.4  | ♂   | 2                | 40  | 56.2 | 76               | 38   | 53.9 | 84               | 41         | 53.8 | 84               | -0.2        | 0.0              | 0.5348            |
| Heat   | 3   | daGal4 | 4.4  | ♂   | 3                | 38  | 55.2 | 76               | 38   | 52.9 | 76               | 40         | 52.7 | 68               | -0.5        | -10.5            | 0.2226            |
| Heat   | 3   | daGal4 | 4.4  | ♂   | 4                | 40  | 31.3 | 36               | 40   | 29.5 | 41               | 40         | 34.9 | 41               | 11.5        | 0.0              | <b>0.0003</b>     |
| Heat   | 3   | DJ694  | 2.1  | ♀   | 1                | 37  | 72.0 | 84               | 39   | 69.4 | 93               | 39         | 67.3 | 93               | -3.0        | 0.0              | <b>0.0434</b>     |
| Heat   | 3   | DJ694  | 2.1  | ♀   | 2                | 41  | 64.9 | 76               | 31   | 60.9 | 76               | 46         | 60.4 | 84               | -0.9        | 10.5             | 0.0525            |
| Heat   | 3   | DJ694  | 2.1  | ♀   | 3                | 42  | 59.0 | 76               | 37   | 65.3 | 84               | 43         | 56.8 | 76               | -3.6        | 0.0              | <b>0.0028</b>     |
| Heat   | 3   | DJ694  | 2.1  | ♀   | 4                | 40  | 24.9 | 41               | 39   | 24.5 | 41               | 40         | 18.7 | 30               | -23.7       | -26.8            | <b>&lt;0.0001</b> |
| Heat   | 3   | DJ694  | 2.1  | ♂   | 1                | 38  | 61.4 | 84               | 37   | 63.2 | 84               | 40         | 52.4 | 76               | -14.6       | -9.5             | <b>&lt;0.0001</b> |
| Heat   | 3   | DJ694  | 2.1  | ♂   | 2                | 40  | 58.9 | 68               | 33   | 58.4 | 76               | 40         | 52.3 | 76               | -10.5       | 0.0              | <b>0.0039</b>     |
| Heat   | 3   | DJ694  | 2.1  | ♂   | 3                | 40  | 51.4 | 76               | 35   | 54.1 | 76               | 42         | 55.1 | 76               | 2.0         | 0.0              | 0.1223            |
| Heat   | 3   | DJ694  | 2.1  | ♂   | 4                | 40  | 23.5 | 34               | 40   | 21.4 | 34               | 40         | 21.9 | 41               | 0.0         | 20.6             |                   |
| Heat   | 3   | DJ694  | 4.3  | ♀   | 1                | 40  | 68.0 | 84               | 39   | 69.4 | 93               | 40         | 63.5 | 76               | -6.6        | -9.5             | <b>0.0141</b>     |
| Heat   | 3   | DJ694  | 4.3  | ♀   | 2                | 40  | 60.7 | 76               | 31   | 60.9 | 76               | 36         | 60.6 | 76               | -0.2        | 0.0              | 0.4922            |
| Heat   | 3   | DJ694  | 4.3  | ♀   | 3                | 41  | 51.1 | 56               | 37   | 65.3 | 84               | 41         | 52.2 | 76               | 0.0         | 0.0              |                   |
| Heat   | 3   | DJ694  | 4.3  | ♀   | 4                | 39  | 28.1 | 36               | 40   | 24.9 | 36               | 40         | 22.6 | 41               | -9.3        | 13.9             | <b>0.0106</b>     |
| Heat   | 3   | DJ694  | 4.3  | ♂   | 1                | 41  | 63.7 | 76               | 37   | 63.2 | 84               | 38         | 55.6 | 76               | -12.0       | 0.0              | <b>0.0026</b>     |
| Heat   | 3   | DJ694  | 4.3  | ♂   | 2                | 42  | 55.5 | 76               | 33   | 58.4 | 76               | 39         | 54.1 | 76               | -2.7        | 0.0              | 0.0694            |
| Heat   | 3   | DJ694  | 4.3  | ♂   | 3                | 41  | 51.9 | 76               | 35   | 54.1 | 76               | 41         | 43.6 | 48               | -16.0       | -36.8            | <b>&lt;0.0001</b> |
| Heat   | 3   | DJ694  | 4.3  | ♂   | 4                | 40  | 25.5 | 36               | 39   | 29.6 | 36               | 40         | 27.1 | 36               | 0.0         | 0.0              |                   |
| Heat   | 3   | DJ694  | 9.1  | ♀   | 1                | 39  | 69.1 | 93               | 39   | 69.4 | 93               | 41         | 61.1 | 84               | -11.6       | -9.7             | <b>0.0056</b>     |
| Heat   | 3   | DJ694  | 9.1  | ♀   | 2                | 41  | 61.6 | 76               | 31   | 60.9 | 76               | 40         | 58.8 | 76               | -3.5        | 0.0              | 0.2002            |
| Heat   | 3   | DJ694  | 9.1  | ♀   | 3                | 43  | 60.7 | 76               | 37   | 65.3 | 84               | 39         | 46.3 | 52               | -23.9       | -31.6            | <b>&lt;0.0001</b> |
| Heat   | 3   | DJ694  | 9.1  | ♂   | 1                | 39  | 68.7 | 84               | 37   | 63.2 | 84               | 40         | 52.1 | 64               | -17.5       | -23.8            | <b>&lt;0.0001</b> |
| Heat   | 3   | DJ694  | 9.1  | ♂   | 2                | 40  | 57.7 | 76               | 33   | 58.4 | 76               | 38         | 44.2 | 68               | -23.4       | -10.5            | <b>&lt;0.0001</b> |
| Heat   | 3   | DJ694  | 9.1  | ♂   | 3                | 40  | 55.4 | 76               | 35   | 54.1 | 76               | 30         | 48.4 | 64               | -10.5       | -15.8            | <b>0.0051</b>     |
| Heat   | 3   | DJ694  | 3.2  | ♀   | 1                | 40  | 60.1 | 76               | 39   | 69.4 | 93               | 40         | 54.5 | 60               | -9.3        | -21.1            | <b>&lt;0.0001</b> |
| Heat   | 3   | DJ694  | 3.2  | ♀   | 2                | 39  | 52.8 | 68               | 31   | 60.9 | 76               | 40         | 52.5 | 56               | -0.6        | -17.6            | 0.9298            |
| Heat   | 3   | DJ694  | 3.2  | ♀   | 3                | 40  | 50.2 | 56               | 37   | 65.3 | 84               | 33         | 51.9 | 56               | 0.0         | 0.0              |                   |
| Heat   | 3   | DJ694  | 3.2  | ♀   | 4                | 39  | 31.2 | 42               | 39   | 17.7 | 22               | 40         | 37.4 | 46               | 20.0        | 9.5              | <b>&lt;0.0001</b> |
| Heat   | 3   | DJ694  | 3.2  | ♂   | 1                | 40  | 60.1 | 93               | 37   | 63.2 | 84               | 39         | 47.8 | 64               | -20.4       | -23.8            | <b>&lt;0.0001</b> |
| Heat   | 3   | DJ694  | 3.2  | ♂   | 2                | 45  | 46.5 | 64               | 33   | 58.4 | 76               | 39         | 40.4 | 48               | -13.1       | -25.0            | <b>&lt;0.0001</b> |
| Heat   | 3   | DJ694  | 3.2  | ♂   | 3                | 40  | 47.4 | 60               | 35   | 54.1 | 76               | 39         | 45.4 | 56               | -4.1        | -6.7             | <b>0.0004</b>     |
| Heat   | 3   | DJ694  | 3.2  | ♂   | 4                | 36  | 21.3 | 30               | 40   | 18.1 | 30               | 40         | 21.6 | 30               | 1.4         | 0.0              | <b>0.0002</b>     |
| Heat   | 3   | DJ694  | 10.1 | ♀   | 1                | 40  | 61.5 | 84               | 39   | 69.4 | 93               | 40         | 55.6 | 64               | -9.6        | -23.8            | <b>0.0010</b>     |
| Heat   | 3   | DJ694  | 10.1 | ♀   | 2                | 40  | 50.7 | 56               | 31   | 60.9 | 76               | 40         | 49.9 | 56               | -1.6        | 0.0              | 0.2561            |
| Heat   | 3   | DJ694  | 10.1 | ♀   | 3                | 40  | 50.4 | 56               | 37   | 65.3 | 84               | 40         | 48.8 | 56               | -3.2        | 0.0              | 0.1880            |
| Heat   | 3   | DJ694  | 10.1 | ♀   | 4                | 39  | 32.5 | 41               | 40   | 27.3 | 31               | 39         | 32.2 | 36               | 0.0         | 0.0              |                   |
| Heat   | 3   | DJ694  | 10.1 | ♂   | 1                | 29  | 61.8 | 84               | 37   | 63.2 | 84               | 39         | 48.2 | 60               | -22.0       | -28.6            | <b>&lt;0.0001</b> |
| Heat   | 3   | DJ694  | 10.1 | ♂   | 2                | 40  | 46.4 | 52               | 33   | 58.4 | 76               | 40         | 43.3 | 52               | -6.7        | 0.0              | <b>0.0010</b>     |
| Heat   | 3   | DJ694  | 10.1 | ♂   | 3                | 39  | 48.3 | 60               | 35   | 54.1 | 76               | 30         | 47.1 | 52               | -2.6        | -13.3            | <b>0.0033</b>     |
| Heat   | 3   | DJ694  | 10.1 | ♂   | 4                | 40  | 26.2 | 36               | 41   | 22.8 | 31               | 40         | 24.5 | 31               | 0.0         | 0.0              |                   |
| Heat   | 3   | DJ694  | 3.1  | ♀   | 1                | 40  | 59.0 | 76               | 39   | 69.4 | 93               | 41         | 51.6 | 56               | -12.5       | -26.3            | <b>0.0003</b>     |
| Heat   | 3   | DJ694  | 3.1  | ♀   | 2                | 41  | 50.4 | 60               | 31   | 60.9 | 76               | 40         | 46.4 | 52               | -8.0        | -13.3            | <b>0.0006</b>     |
| Heat   | 3   | DJ694  | 3.1  | ♀   | 3                | 38  | 46.2 | 56               | 37   | 65.3 | 84               | 40         | 44.3 | 48               | -4.1        | -14.3            | <b>0.0063</b>     |
| Heat   | 3   | DJ694  | 3.1  | ♀   | 4                | 38  | 22.6 | 34               | 39   | 17.7 | 22               | 40         | 26.7 | 38               | 18.3        | 11.8             | <b>0.0012</b>     |
| Heat   | 3   | DJ694  | 3.1  | ♂   | 1                | 39  | 61.9 | 76               | 37   | 63.2 | 84               | 41         | 49.1 | 52               | -20.8       | -31.6            | <b>&lt;0.0001</b> |
| Heat   | 3   | DJ694  | 3.1  | ♂   | 2                | 40  | 42.6 | 56               | 33   | 58.4 | 76               | 40         | 41.8 | 44               | -1.9        | -21.4            | 0.6872            |

Table S2

| Stress | Age | Gal4  | UAS  | Sex | Rep <sup>1</sup> | UAS |      |                  | Gal4 |      |                  | Gal4 + UAS |      |                  | % Extension |                  | P                 |
|--------|-----|-------|------|-----|------------------|-----|------|------------------|------|------|------------------|------------|------|------------------|-------------|------------------|-------------------|
|        |     |       |      |     |                  | n   | Mean | Max <sup>2</sup> | n    | Mean | Max <sup>2</sup> | n          | Mean | Max <sup>2</sup> | Mean        | Max <sup>2</sup> |                   |
| Heat   | 3   | DJ694 | 3.1  | ♂   | 3                | 18  | 52.2 | 76               | 35   | 54.1 | 76               | 44         | 42.1 | 48               | -19.4       | -36.8            | <b>0.0004</b>     |
| Heat   | 3   | DJ694 | 3.1  | ♂   | 4                | 40  | 16.5 | 26               | 40   | 18.1 | 30               | 40         | 18.3 | 22               | 0.8         | -15.4            | <b>0.0111</b>     |
| Heat   | 3   | DJ694 | 4.4  | ♀   | 1                | 41  | 67.1 | 84               | 39   | 69.4 | 93               | 38         | 66.7 | 84               | -0.7        | 0.0              | 0.2066            |
| Heat   | 3   | DJ694 | 4.4  | ♀   | 2                | 33  | 60.8 | 76               | 31   | 60.9 | 76               | 41         | 64.6 | 93               | 6.1         | 22.4             | 0.1122            |
| Heat   | 3   | DJ694 | 4.4  | ♀   | 3                | 40  | 59.3 | 76               | 37   | 65.3 | 84               | 39         | 64.7 | 93               | 0.0         | 10.7             |                   |
| Heat   | 3   | DJ694 | 4.4  | ♀   | 4                | 40  | 32.2 | 41               | 40   | 24.9 | 36               | 40         | 26.3 | 36               | 0.0         | 0.0              |                   |
| Heat   | 3   | DJ694 | 4.4  | ♂   | 1                | 43  | 69.9 | 84               | 37   | 63.2 | 84               | 40         | 59.2 | 76               | -6.3        | -9.5             | 0.0892            |
| Heat   | 3   | DJ694 | 4.4  | ♂   | 2                | 40  | 56.2 | 76               | 33   | 58.4 | 76               | 43         | 57.5 | 76               | 0.0         | 0.0              |                   |
| Heat   | 3   | DJ694 | 4.4  | ♂   | 3                | 38  | 55.2 | 76               | 35   | 54.1 | 76               | 44         | 60.1 | 76               | 8.9         | 0.0              | <b>0.0149</b>     |
| Heat   | 3   | DJ694 | 4.4  | ♂   | 4                | 40  | 31.3 | 36               | 39   | 29.6 | 36               | 40         | 30.8 | 36               | 0.0         | 0.0              |                   |
| Heat   | 3   | D42   | 2.1  | ♀   | 1                | 37  | 72.0 | 84               | 30   | 63.0 | 93               | 39         | 58.7 | 68               | -6.9        | -19.0            | 0.0854            |
| Heat   | 3   | D42   | 2.1  | ♀   | 2                | 41  | 64.9 | 76               | 36   | 54.3 | 76               | 43         | 56.0 | 84               | 0.0         | 10.5             |                   |
| Heat   | 3   | D42   | 2.1  | ♀   | 3                | 42  | 59.0 | 76               | 40   | 62.4 | 93               | 38         | 56.2 | 76               | -4.7        | 0.0              | <b>0.0024</b>     |
| Heat   | 3   | D42   | 2.1  | ♀   | 4                | 40  | 24.9 | 41               | 40   | 19.1 | 30               | 41         | 22.0 | 41               | 0.0         | 0.0              |                   |
| Heat   | 3   | D42   | 2.1  | ♂   | 1                | 38  | 61.4 | 84               | 37   | 58.8 | 76               | 39         | 49.1 | 64               | -16.5       | -15.8            | <b>&lt;0.0001</b> |
| Heat   | 3   | D42   | 2.1  | ♂   | 2                | 40  | 58.9 | 68               | 32   | 52.0 | 76               | 39         | 45.8 | 64               | -11.8       | -5.9             | <b>0.0265</b>     |
| Heat   | 3   | D42   | 2.1  | ♂   | 3                | 40  | 51.4 | 76               | 39   | 53.9 | 76               | 39         | 49.0 | 64               | -4.6        | -15.8            | <b>0.0461</b>     |
| Heat   | 3   | D42   | 2.1  | ♂   | 4                | 40  | 23.5 | 34               | 39   | 21.0 | 41               | 40         | 20.9 | 41               | -0.8        | 0.0              | 0.1893            |
| Heat   | 3   | D42   | 4.3  | ♀   | 1                | 40  | 68.0 | 84               | 30   | 63.0 | 93               | 36         | 66.5 | 84               | 0.0         | 0.0              |                   |
| Heat   | 3   | D42   | 4.3  | ♀   | 2                | 40  | 60.7 | 76               | 36   | 54.3 | 76               | 35         | 59.1 | 76               | 0.0         | 0.0              |                   |
| Heat   | 3   | D42   | 4.3  | ♀   | 3                | 41  | 51.1 | 56               | 40   | 62.4 | 93               | 39         | 61.9 | 76               | 0.0         | 0.0              |                   |
| Heat   | 3   | D42   | 4.3  | ♀   | 4                | 39  | 28.1 | 36               | 40   | 27.5 | 36               | 40         | 30.9 | 46               | 10.0        | 27.8             | <b>0.0205</b>     |
| Heat   | 3   | D42   | 4.3  | ♂   | 1                | 41  | 63.7 | 76               | 37   | 58.8 | 76               | 39         | 52.3 | 64               | -11.1       | -15.8            | <b>0.0067</b>     |
| Heat   | 3   | D42   | 4.3  | ♂   | 2                | 42  | 55.5 | 76               | 32   | 52.0 | 76               | 40         | 50.1 | 68               | -3.7        | -10.5            | <b>0.0266</b>     |
| Heat   | 3   | D42   | 4.3  | ♂   | 3                | 41  | 51.9 | 76               | 39   | 53.9 | 76               | 42         | 49.0 | 56               | -5.7        | -26.3            | <b>0.0082</b>     |
| Heat   | 3   | D42   | 4.3  | ♂   | 4                | 40  | 25.5 | 36               | 40   | 27.9 | 41               | 40         | 27.7 | 36               | 0.0         | 0.0              |                   |
| Heat   | 3   | D42   | 9.1  | ♀   | 1                | 39  | 69.1 | 93               | 30   | 63.0 | 93               | 39         | 61.3 | 76               | -2.7        | -18.3            | 0.4739            |
| Heat   | 3   | D42   | 9.1  | ♀   | 2                | 41  | 61.6 | 76               | 36   | 54.3 | 76               | 46         | 59.4 | 84               | 0.0         | 10.5             |                   |
| Heat   | 3   | D42   | 9.1  | ♀   | 3                | 43  | 60.7 | 76               | 40   | 62.4 | 93               | 39         | 59.9 | 76               | -1.4        | 0.0              | 0.1615            |
| Heat   | 3   | D42   | 9.1  | ♂   | 1                | 39  | 68.7 | 84               | 37   | 58.8 | 76               | 41         | 53.4 | 76               | -9.3        | 0.0              | <b>0.0103</b>     |
| Heat   | 3   | D42   | 9.1  | ♂   | 2                | 40  | 57.7 | 76               | 32   | 52.0 | 76               | 42         | 45.5 | 56               | -12.5       | -26.3            | <b>0.0004</b>     |
| Heat   | 3   | D42   | 9.1  | ♂   | 3                | 40  | 55.4 | 76               | 39   | 53.9 | 76               | 42         | 50.3 | 76               | -6.8        | 0.0              | <b>0.0081</b>     |
| Heat   | 3   | D42   | 3.2  | ♀   | 1                | 40  | 60.1 | 76               | 30   | 63.0 | 93               | 40         | 65.0 | 93               | 3.0         | 0.0              | <b>0.0197</b>     |
| Heat   | 3   | D42   | 3.2  | ♀   | 2                | 39  | 52.8 | 68               | 36   | 54.3 | 76               | 37         | 55.9 | 68               | 2.9         | 0.0              | <b>0.0180</b>     |
| Heat   | 3   | D42   | 3.2  | ♀   | 3                | 40  | 50.2 | 56               | 40   | 62.4 | 93               | 39         | 55.0 | 76               | 0.0         | 0.0              |                   |
| Heat   | 3   | D42   | 3.2  | ♀   | 4                | 39  | 31.2 | 42               | 39   | 22.6 | 30               | 40         | 34.5 | 42               | 10.6        | 0.0              | <b>0.0208</b>     |
| Heat   | 3   | D42   | 3.2  | ♂   | 1                | 40  | 60.1 | 93               | 37   | 58.8 | 76               | 39         | 56.5 | 76               | -3.9        | 0.0              | 0.1721            |
| Heat   | 3   | D42   | 3.2  | ♂   | 2                | 45  | 46.5 | 64               | 32   | 52.0 | 76               | 47         | 46.8 | 64               | 0.0         | 0.0              |                   |
| Heat   | 3   | D42   | 3.2  | ♂   | 3                | 40  | 47.4 | 60               | 39   | 53.9 | 76               | 40         | 48.0 | 68               | 0.0         | 0.0              |                   |
| Heat   | 3   | D42   | 3.2  | ♂   | 4                | 36  | 21.3 | 30               | 39   | 21.3 | 38               | 40         | 25.7 | 34               | 20.4        | 0.0              | <b>0.0989</b>     |
| Heat   | 3   | D42   | 10.1 | ♀   | 1                | 40  | 61.5 | 84               | 30   | 63.0 | 93               | 41         | 52.0 | 60               | -15.4       | -28.6            | <b>&lt;0.0001</b> |
| Heat   | 3   | D42   | 10.1 | ♀   | 2                | 40  | 50.7 | 56               | 36   | 54.3 | 76               | 41         | 53.3 | 56               | 0.0         | 0.0              |                   |
| Heat   | 3   | D42   | 10.1 | ♀   | 3                | 40  | 50.4 | 56               | 40   | 62.4 | 93               | 40         | 52.7 | 60               | 0.0         | 0.0              |                   |
| Heat   | 3   | D42   | 10.1 | ♀   | 4                | 39  | 32.5 | 41               | 39   | 25.0 | 36               | 40         | 31.9 | 36               | 0.0         | 0.0              |                   |
| Heat   | 3   | D42   | 10.1 | ♂   | 1                | 29  | 61.8 | 84               | 37   | 58.8 | 76               | 39         | 49.6 | 64               | -15.6       | -15.8            | <b>&lt;0.0001</b> |
| Heat   | 3   | D42   | 10.1 | ♂   | 2                | 40  | 46.4 | 52               | 32   | 52.0 | 76               | 40         | 49.7 | 56               | 0.0         | 0.0              |                   |
| Heat   | 3   | D42   | 10.1 | ♂   | 3                | 39  | 48.3 | 60               | 39   | 53.9 | 76               | 39         | 45.0 | 52               | -6.8        | -13.3            | <b>0.0127</b>     |
| Heat   | 3   | D42   | 10.1 | ♂   | 4                | 40  | 26.2 | 36               | 40   | 21.7 | 26               | 40         | 25.8 | 31               | 0.0         | 0.0              |                   |
| Heat   | 3   | D42   | 3.1  | ♀   | 1                | 40  | 59.0 | 76               | 30   | 63.0 | 93               | 52         | 57.9 | 76               | -1.8        | 0.0              | <b>0.0290</b>     |

Table S2

| Stress | Age | Gal4   | UAS  | Sex | Rep <sup>1</sup> | UAS |      |                  | Gal4 |      |                  | Gal4 + UAS |      |                  | % Extension |                  | P                 |
|--------|-----|--------|------|-----|------------------|-----|------|------------------|------|------|------------------|------------|------|------------------|-------------|------------------|-------------------|
|        |     |        |      |     |                  | n   | Mean | Max <sup>2</sup> | n    | Mean | Max <sup>2</sup> | n          | Mean | Max <sup>2</sup> | Mean        | Max <sup>2</sup> |                   |
| Heat   | 3   | D42    | 3.1  | ♀   | 2                | 41  | 50.4 | 60               | 36   | 54.3 | 76               | 42         | 58.7 | 93               | 8.1         | 22.4             | 0.1511            |
| Heat   | 3   | D42    | 3.1  | ♀   | 3                | 38  | 46.2 | 56               | 40   | 62.4 | 93               | 41         | 52.7 | 76               | 0.0         | 0.0              |                   |
| Heat   | 3   | D42    | 3.1  | ♀   | 4                | 38  | 22.6 | 34               | 39   | 22.6 | 30               | 40         | 23.7 | 34               | 5.0         | 0.0              | 0.1976            |
| Heat   | 3   | D42    | 3.1  | ♂   | 1                | 39  | 61.9 | 76               | 37   | 58.8 | 76               | 40         | 54.7 | 76               | -7.0        | 0.0              | <b>0.0006</b>     |
| Heat   | 3   | D42    | 3.1  | ♂   | 2                | 40  | 42.6 | 56               | 32   | 52.0 | 76               | 40         | 52.9 | 76               | 1.7         | 0.0              | 0.7850            |
| Heat   | 3   | D42    | 3.1  | ♂   | 3                | 18  | 52.2 | 76               | 39   | 53.9 | 76               | 42         | 49.8 | 68               | -4.6        | -10.5            | <b>0.0430</b>     |
| Heat   | 3   | D42    | 3.1  | ♂   | 4                | 40  | 16.5 | 26               | 39   | 21.3 | 38               | 40         | 17.5 | 22               | 0.0         | -15.4            | 0.0041            |
| Heat   | 3   | D42    | 4.4  | ♀   | 1                | 41  | 67.1 | 84               | 30   | 63.0 | 93               | 38         | 65.1 | 93               | 0.0         | 0.0              |                   |
| Heat   | 3   | D42    | 4.4  | ♀   | 2                | 33  | 60.8 | 76               | 36   | 54.3 | 76               | 47         | 60.6 | 93               | 0.0         | 22.4             |                   |
| Heat   | 3   | D42    | 4.4  | ♀   | 3                | 40  | 59.3 | 76               | 40   | 62.4 | 93               | 46         | 55.4 | 76               | -6.6        | 0.0              | <b>0.0004</b>     |
| Heat   | 3   | D42    | 4.4  | ♀   | 4                | 40  | 32.2 | 41               | 40   | 27.5 | 36               | 40         | 36.5 | 46               | 13.4        | 12.2             | <b>0.0011</b>     |
| Heat   | 3   | D42    | 4.4  | ♂   | 1                | 43  | 69.9 | 84               | 37   | 58.8 | 76               | 41         | 57.5 | 76               | -2.3        | 0.0              | 0.6225            |
| Heat   | 3   | D42    | 4.4  | ♂   | 2                | 40  | 56.2 | 76               | 32   | 52.0 | 76               | 45         | 58.9 | 84               | 4.9         | 10.5             | <b>0.0091</b>     |
| Heat   | 3   | D42    | 4.4  | ♂   | 3                | 38  | 55.2 | 76               | 39   | 53.9 | 76               | 40         | 53.6 | 76               | -0.6        | 0.0              | 0.5432            |
| Heat   | 3   | D42    | 4.4  | ♂   | 4                | 40  | 31.3 | 36               | 41   | 28.0 | 41               | 40         | 35.8 | 46               | 14.4        | 12.2             | <b>&lt;0.0001</b> |
| Heat   | 10  | daGal4 | 2.1  | ♀   | 1                | 40  | 20.8 | 30               | 38   | 18.5 | 30               | 40         | 21.1 | 30               | 1.4         | 0.0              | <b>0.0164</b>     |
| Heat   | 10  | daGal4 | 2.1  | ♀   | 2                | 39  | 31.5 | 36               | 41   | 30.0 | 33               | 39         | 30.4 | 33               | 0.0         | 0.0              |                   |
| Heat   | 10  | daGal4 | 2.1  | ♀   | 3                | 39  | 33.5 | 40               | 40   | 30.7 | 36               | 40         | 32.1 | 40               | 0.0         | 0.0              |                   |
| Heat   | 10  | daGal4 | 2.1  | ♀   | 4                | 36  | 30.1 | 33               | 37   | 28.5 | 33               | 40         | 29.0 | 33               | 0.0         | 0.0              |                   |
| Heat   | 10  | daGal4 | 2.1  | ♂   | 1                | 39  | 16.4 | 21               | 37   | 15.9 | 21               | 40         | 17.9 | 21               | 9.1         | 0.0              | <b>0.0027</b>     |
| Heat   | 10  | daGal4 | 2.1  | ♂   | 2                | 39  | 27.0 | 28               | 38   | 25.3 | 28               | 39         | 27.7 | 28               | 2.7         | 0.0              | <b>0.0346</b>     |
| Heat   | 10  | daGal4 | 2.1  | ♂   | 3                | 38  | 27.4 | 33               | 40   | 25.7 | 28               | 41         | 27.3 | 33               | 0.0         | 0.0              |                   |
| Heat   | 10  | daGal4 | 2.1  | ♂   | 4                | 40  | 24.7 | 28               | 40   | 24.9 | 28               | 39         | 25.0 | 28               | 0.5         | 0.0              | 0.2057            |
| Heat   | 10  | daGal4 | 4.3  | ♀   | 1                | 26  | 17.5 | 21               | 39   | 17.8 | 21               | 40         | 18.7 | 21               | 4.9         | 0.0              | 0.0697            |
| Heat   | 10  | daGal4 | 4.3  | ♀   | 2                | 39  | 31.2 | 36               | 41   | 30.0 | 33               | 40         | 33.4 | 40               | 7.0         | 11.1             | <b>0.0005</b>     |
| Heat   | 10  | daGal4 | 4.3  | ♀   | 3                | 41  | 32.2 | 36               | 40   | 30.7 | 36               | 42         | 33.0 | 36               | 2.4         | 0.0              | <b>0.0008</b>     |
| Heat   | 10  | daGal4 | 4.3  | ♀   | 4                | 38  | 29.1 | 33               | 37   | 28.5 | 33               | 40         | 31.7 | 33               | 9.1         | 0.0              | <b>0.0243</b>     |
| Heat   | 10  | daGal4 | 4.3  | ♂   | 1                | 27  | 14.6 | 17               | 39   | 16.9 | 21               | 40         | 15.1 | 17               | 0.0         | 0.0              |                   |
| Heat   | 10  | daGal4 | 4.3  | ♂   | 2                | 31  | 25.7 | 28               | 38   | 25.3 | 28               | 39         | 28.4 | 33               | 10.7        | 17.9             | <b>0.0013</b>     |
| Heat   | 10  | daGal4 | 4.3  | ♂   | 3                | 41  | 26.2 | 28               | 40   | 25.7 | 28               | 39         | 27.8 | 33               | 6.4         | 17.9             | <b>0.0004</b>     |
| Heat   | 10  | daGal4 | 4.3  | ♂   | 4                | 41  | 24.2 | 28               | 40   | 24.9 | 28               | 35         | 27.1 | 28               | 8.9         | 0.0              | <b>&lt;0.0001</b> |
| Heat   | 10  | daGal4 | 9.1  | ♀   | 1                | 39  | 31.8 | 36               | 41   | 30.0 | 33               | 41         | 32.0 | 40               | 0.6         | 11.1             | <b>0.0027</b>     |
| Heat   | 10  | daGal4 | 9.1  | ♀   | 2                | 40  | 32.8 | 40               | 40   | 30.7 | 36               | 41         | 35.0 | 40               | 6.9         | 0.0              | <b>0.0051</b>     |
| Heat   | 10  | daGal4 | 9.1  | ♀   | 3                | 39  | 29.3 | 33               | 37   | 28.5 | 33               | 39         | 29.5 | 36               | 0.7         | 9.1              | 0.0638            |
| Heat   | 10  | daGal4 | 9.1  | ♂   | 1                | 40  | 25.8 | 28               | 38   | 25.3 | 28               | 39         | 29.0 | 33               | 12.5        | 17.9             | <b>&lt;0.0001</b> |
| Heat   | 10  | daGal4 | 9.1  | ♂   | 2                | 41  | 27.6 | 33               | 40   | 25.7 | 28               | 38         | 30.5 | 33               | 10.6        | 0.0              | <b>&lt;0.0001</b> |
| Heat   | 10  | daGal4 | 9.1  | ♂   | 3                | 43  | 25.1 | 28               | 40   | 24.9 | 28               | 41         | 27.5 | 28               | 9.6         | 0.0              | <b>&lt;0.0001</b> |
| Heat   | 10  | daGal4 | 3.2  | ♀   | 1                | 32  | 19.0 | 27               | 40   | 18.0 | 24               | 40         | 30.6 | 40               | 61.2        | 48.1             | <b>&lt;0.0001</b> |
| Heat   | 10  | daGal4 | 3.2  | ♀   | 2                | 39  | 35.3 | 40               | 41   | 30.0 | 33               | 40         | 32.0 | 36               | 0.0         | 0.0              |                   |
| Heat   | 10  | daGal4 | 3.2  | ♀   | 3                | 40  | 36.6 | 40               | 40   | 30.7 | 36               | 38         | 32.3 | 36               | 0.0         | 0.0              |                   |
| Heat   | 10  | daGal4 | 3.2  | ♀   | 4                | 37  | 32.0 | 40               | 37   | 28.5 | 33               | 40         | 29.4 | 33               | 0.0         | 0.0              |                   |
| Heat   | 10  | daGal4 | 3.2  | ♂   | 1                | 36  | 16.1 | 24               | 40   | 17.1 | 21               | 40         | 17.6 | 21               | 2.6         | 0.0              | <b>0.0426</b>     |
| Heat   | 10  | daGal4 | 3.2  | ♂   | 2                | 40  | 33.5 | 40               | 38   | 25.3 | 28               | 42         | 29.4 | 33               | 0.0         | 0.0              |                   |
| Heat   | 10  | daGal4 | 3.2  | ♂   | 3                | 41  | 32.4 | 40               | 40   | 25.7 | 28               | 42         | 31.8 | 40               | 0.0         | 0.0              |                   |
| Heat   | 10  | daGal4 | 3.2  | ♂   | 4                | 43  | 30.3 | 36               | 40   | 24.9 | 28               | 46         | 28.1 | 33               | 0.0         | 0.0              |                   |
| Heat   | 10  | daGal4 | 10.1 | ♀   | 1                | 36  | 19.3 | 21               | 39   | 17.8 | 21               | 40         | 21.4 | 30               | 10.4        | 42.9             | <b>0.0019</b>     |
| Heat   | 10  | daGal4 | 10.1 | ♀   | 2                | 41  | 34.1 | 40               | 41   | 30.0 | 33               | 40         | 30.4 | 33               | 0.0         | 0.0              |                   |
| Heat   | 10  | daGal4 | 10.1 | ♀   | 3                | 41  | 36.1 | 45               | 40   | 30.7 | 36               | 40         | 31.7 | 36               | 0.0         | 0.0              |                   |
| Heat   | 10  | daGal4 | 10.1 | ♀   | 4                | 39  | 33.4 | 40               | 37   | 28.5 | 33               | 38         | 28.5 | 33               | 0.0         | 0.0              |                   |

Table S2

| Stress | Age | Gal4   | UAS  | Sex | Rep <sup>1</sup> | UAS |      |                  | Gal4 |      |                  | Gal4 + UAS |      |                  | % Extension |                  | P                 |
|--------|-----|--------|------|-----|------------------|-----|------|------------------|------|------|------------------|------------|------|------------------|-------------|------------------|-------------------|
|        |     |        |      |     |                  | n   | Mean | Max <sup>2</sup> | n    | Mean | Max <sup>2</sup> | n          | Mean | Max <sup>2</sup> | Mean        | Max <sup>2</sup> |                   |
| Heat   | 10  | daGal4 | 10.1 | ♂   | 1                | 40  | 16.6 | 21               | 39   | 16.9 | 21               | 38         | 17.9 | 21               | 6.2         | 0.0              | <b>0.0296</b>     |
| Heat   | 10  | daGal4 | 10.1 | ♂   | 2                | 40  | 31.9 | 40               | 38   | 25.3 | 28               | 39         | 30.4 | 33               | 0.0         | 0.0              |                   |
| Heat   | 10  | daGal4 | 10.1 | ♂   | 3                | 42  | 32.5 | 40               | 40   | 25.7 | 28               | 39         | 31.9 | 36               | 0.0         | 0.0              |                   |
| Heat   | 10  | daGal4 | 10.1 | ♂   | 4                | 45  | 29.1 | 36               | 40   | 24.9 | 28               | 40         | 28.5 | 33               | 0.0         | 0.0              |                   |
| Heat   | 10  | daGal4 | 3.1  | ♀   | 1                | 40  | 15.5 | 21               | 40   | 18.0 | 24               | 40         | 21.6 | 32               | 19.7        | 33.3             | <b>0.0006</b>     |
| Heat   | 10  | daGal4 | 3.1  | ♀   | 2                | 41  | 35.6 | 45               | 41   | 30.0 | 33               | 40         | 32.1 | 33               | 0.0         | 0.0              |                   |
| Heat   | 10  | daGal4 | 3.1  | ♀   | 3                | 35  | 36.0 | 40               | 40   | 30.7 | 36               | 41         | 31.0 | 36               | 0.0         | 0.0              |                   |
| Heat   | 10  | daGal4 | 3.1  | ♀   | 4                | 40  | 32.8 | 40               | 37   | 28.5 | 33               | 42         | 30.7 | 36               | 0.0         | 0.0              |                   |
| Heat   | 10  | daGal4 | 3.1  | ♂   | 1                | 39  | 13.3 | 21               | 40   | 17.1 | 21               | 40         | 18.8 | 24               | 9.6         | 14.3             | <b>0.0068</b>     |
| Heat   | 10  | daGal4 | 3.1  | ♂   | 2                | 40  | 30.8 | 40               | 38   | 25.3 | 28               | 39         | 30.4 | 33               | 0.0         | 0.0              |                   |
| Heat   | 10  | daGal4 | 3.1  | ♂   | 3                | 40  | 32.6 | 40               | 40   | 25.7 | 28               | 40         | 29.7 | 33               | 0.0         | 0.0              |                   |
| Heat   | 10  | daGal4 | 3.1  | ♂   | 4                | 39  | 29.1 | 36               | 40   | 24.9 | 28               | 41         | 27.9 | 33               | 0.0         | 0.0              |                   |
| Heat   | 10  | daGal4 | 4.4  | ♀   | 1                | 39  | 17.6 | 21               | 39   | 17.8 | 21               | 39         | 18.6 | 21               | 4.6         | 0.0              | <b>0.0338</b>     |
| Heat   | 10  | daGal4 | 4.4  | ♀   | 2                | 40  | 32.1 | 36               | 41   | 30.0 | 33               | 41         | 31.0 | 33               | 0.0         | 0.0              |                   |
| Heat   | 10  | daGal4 | 4.4  | ♀   | 3                | 40  | 34.5 | 40               | 40   | 30.7 | 36               | 42         | 29.6 | 36               | -3.4        | 0.0              |                   |
| Heat   | 10  | daGal4 | 4.4  | ♀   | 4                | 38  | 29.8 | 36               | 37   | 28.5 | 33               | 41         | 28.1 | 33               | -1.4        | 0.0              |                   |
| Heat   | 10  | daGal4 | 4.4  | ♂   | 1                | 39  | 13.9 | 17               | 39   | 16.9 | 21               | 40         | 15.8 | 17               | 0.0         | 0.0              | <b>0.1136</b>     |
| Heat   | 10  | daGal4 | 4.4  | ♂   | 2                | 39  | 29.7 | 33               | 38   | 25.3 | 28               | 40         | 27.9 | 28               | 0.0         | 0.0              |                   |
| Heat   | 10  | daGal4 | 4.4  | ♂   | 3                | 39  | 29.9 | 33               | 40   | 25.7 | 28               | 41         | 29.0 | 33               | 0.0         | 0.0              |                   |
| Heat   | 10  | daGal4 | 4.4  | ♂   | 4                | 41  | 27.2 | 28               | 40   | 24.9 | 28               | 38         | 25.6 | 28               | 0.0         | 0.0              |                   |
| Heat   | 10  | DJ694  | 2.1  | ♀   | 1                | 40  | 20.8 | 30               | 38   | 20.4 | 30               | 40         | 20.1 | 30               | -1.8        | 0.0              | 0.1930            |
| Heat   | 10  | DJ694  | 2.1  | ♀   | 2                | 39  | 31.5 | 36               | 40   | 33.3 | 36               | 39         | 30.6 | 36               | -2.7        | 0.0              |                   |
| Heat   | 10  | DJ694  | 2.1  | ♀   | 3                | 39  | 33.5 | 40               | 41   | 35.3 | 40               | 40         | 32.6 | 40               | -2.8        | 0.0              |                   |
| Heat   | 10  | DJ694  | 2.1  | ♀   | 4                | 36  | 30.1 | 33               | 39   | 31.3 | 33               | 39         | 31.1 | 33               | 0.0         | 0.0              |                   |
| Heat   | 10  | DJ694  | 2.1  | ♂   | 1                | 39  | 16.4 | 21               | 37   | 14.9 | 21               | 40         | 16.1 | 21               | 0.0         | 0.0              | <b>0.0003</b>     |
| Heat   | 10  | DJ694  | 2.1  | ♂   | 2                | 39  | 27.0 | 28               | 40   | 27.9 | 28               | 41         | 26.6 | 28               | -1.3        | 0.0              |                   |
| Heat   | 10  | DJ694  | 2.1  | ♂   | 3                | 38  | 27.4 | 33               | 40   | 26.3 | 28               | 40         | 24.6 | 28               | -6.5        | 0.0              |                   |
| Heat   | 10  | DJ694  | 2.1  | ♂   | 4                | 40  | 24.7 | 28               | 38   | 27.4 | 33               | 39         | 24.9 | 28               | 0.0         | 0.0              |                   |
| Heat   | 10  | DJ694  | 4.3  | ♀   | 1                | 26  | 17.5 | 21               | 40   | 18.9 | 21               | 37         | 17.3 | 21               | -0.8        | 0.0              | <b>0.0176</b>     |
| Heat   | 10  | DJ694  | 4.3  | ♀   | 2                | 39  | 31.2 | 36               | 40   | 33.3 | 36               | 38         | 31.3 | 36               | 0.0         | 0.0              |                   |
| Heat   | 10  | DJ694  | 4.3  | ♀   | 3                | 41  | 32.2 | 36               | 41   | 35.3 | 40               | 40         | 34.3 | 40               | 0.0         | 0.0              |                   |
| Heat   | 10  | DJ694  | 4.3  | ♀   | 4                | 38  | 29.1 | 33               | 39   | 31.3 | 33               | 41         | 30.7 | 33               | 0.0         | 0.0              |                   |
| Heat   | 10  | DJ694  | 4.3  | ♂   | 1                | 27  | 14.6 | 17               | 40   | 16.0 | 17               | 38         | 14.9 | 17               | 0.0         | 0.0              | 0.2365            |
| Heat   | 10  | DJ694  | 4.3  | ♂   | 2                | 31  | 25.7 | 28               | 40   | 27.9 | 28               | 42         | 27.3 | 28               | 0.0         | 0.0              |                   |
| Heat   | 10  | DJ694  | 4.3  | ♂   | 3                | 41  | 26.2 | 28               | 40   | 26.3 | 28               | 38         | 25.9 | 28               | -1.1        | 0.0              |                   |
| Heat   | 10  | DJ694  | 4.3  | ♂   | 4                | 41  | 24.2 | 28               | 38   | 27.4 | 33               | 40         | 26.1 | 28               | 0.0         | 0.0              |                   |
| Heat   | 10  | DJ694  | 9.1  | ♀   | 1                | 39  | 31.8 | 36               | 40   | 33.3 | 36               | 39         | 33.6 | 36               | 1.0         | 0.0              | <b>0.0298</b>     |
| Heat   | 10  | DJ694  | 9.1  | ♀   | 2                | 40  | 32.8 | 40               | 41   | 35.3 | 40               | 41         | 37.4 | 40               | 5.9         | 0.0              |                   |
| Heat   | 10  | DJ694  | 9.1  | ♀   | 3                | 39  | 29.3 | 33               | 39   | 31.3 | 33               | 40         | 31.8 | 33               | 1.6         | 0.0              |                   |
| Heat   | 10  | DJ694  | 9.1  | ♂   | 1                | 40  | 25.8 | 28               | 40   | 27.9 | 28               | 41         | 27.6 | 28               | 0.0         | 0.0              |                   |
| Heat   | 10  | DJ694  | 9.1  | ♂   | 2                | 41  | 27.6 | 33               | 40   | 26.3 | 28               | 40         | 27.4 | 28               | 0.0         | 0.0              | <b>&lt;0.0001</b> |
| Heat   | 10  | DJ694  | 9.1  | ♂   | 3                | 43  | 25.1 | 28               | 38   | 27.4 | 33               | 43         | 26.0 | 28               | 0.0         | 0.0              |                   |
| Heat   | 10  | DJ694  | 3.2  | ♀   | 1                | 32  | 19.0 | 27               | 40   | 14.9 | 21               | 40         | 26.9 | 36               | 41.6        | 33.3             |                   |
| Heat   | 10  | DJ694  | 3.2  | ♀   | 2                | 39  | 35.3 | 40               | 40   | 33.3 | 36               | 40         | 35.2 | 40               | 0.0         | 0.0              |                   |
| Heat   | 10  | DJ694  | 3.2  | ♀   | 3                | 40  | 36.6 | 40               | 41   | 35.3 | 40               | 40         | 41.1 | 45               | 12.4        | 12.5             | <b>&lt;0.0001</b> |
| Heat   | 10  | DJ694  | 3.2  | ♀   | 4                | 37  | 32.0 | 40               | 39   | 31.3 | 33               | 40         | 36.7 | 45               | 14.6        | 12.5             |                   |
| Heat   | 10  | DJ694  | 3.2  | ♂   | 1                | 36  | 16.1 | 24               | 40   | 15.7 | 21               | 40         | 16.2 | 18               | 0.7         | -14.3            |                   |
| Heat   | 10  | DJ694  | 3.2  | ♂   | 2                | 40  | 33.5 | 40               | 40   | 27.9 | 28               | 40         | 28.5 | 33               | 0.0         | 0.0              |                   |
| Heat   | 10  | DJ694  | 3.2  | ♂   | 3                | 41  | 32.4 | 40               | 40   | 26.3 | 28               | 40         | 29.9 | 33               | 0.0         | 0.0              |                   |

Table S2

| Stress | Age | Gal4  | UAS  | Sex | Rep <sup>1</sup> | UAS |      |                  | Gal4 |      |                  | Gal4 + UAS |      |                  | % Extension |                  | P       |
|--------|-----|-------|------|-----|------------------|-----|------|------------------|------|------|------------------|------------|------|------------------|-------------|------------------|---------|
|        |     |       |      |     |                  | n   | Mean | Max <sup>2</sup> | n    | Mean | Max <sup>2</sup> | n          | Mean | Max <sup>2</sup> | Mean        | Max <sup>2</sup> |         |
| Heat   | 10  | DJ694 | 3.2  | ♂   | 4                | 43  | 30.3 | 36               | 38   | 27.4 | 33               | 39         | 27.8 | 33               | 0.0         | 0.0              | 0.1489  |
| Heat   | 10  | DJ694 | 10.1 | ♀   | 1                | 36  | 19.3 | 21               | 40   | 18.9 | 21               | 42         | 18.9 | 24               | 0.0         | 14.3             |         |
| Heat   | 10  | DJ694 | 10.1 | ♀   | 2                | 41  | 34.1 | 40               | 40   | 33.3 | 36               | 40         | 33.8 | 40               | 0.0         | 0.0              |         |
| Heat   | 10  | DJ694 | 10.1 | ♀   | 3                | 41  | 36.1 | 45               | 41   | 35.3 | 40               | 40         | 36.6 | 45               | 1.3         | 0.0              |         |
| Heat   | 10  | DJ694 | 10.1 | ♀   | 4                | 39  | 33.4 | 40               | 39   | 31.3 | 33               | 40         | 32.7 | 36               | 0.0         | 0.0              | 0.0319  |
| Heat   | 10  | DJ694 | 10.1 | ♂   | 1                | 40  | 16.6 | 21               | 40   | 16.0 | 17               | 25         | 15.2 | 17               | -4.8        | 0.0              |         |
| Heat   | 10  | DJ694 | 10.1 | ♂   | 2                | 40  | 31.9 | 40               | 40   | 27.9 | 28               | 39         | 31.6 | 33               | 0.0         | 0.0              |         |
| Heat   | 10  | DJ694 | 10.1 | ♂   | 3                | 42  | 32.5 | 40               | 40   | 26.3 | 28               | 41         | 30.1 | 36               | 0.0         | 0.0              |         |
| Heat   | 10  | DJ694 | 10.1 | ♂   | 4                | 45  | 29.1 | 36               | 38   | 27.4 | 0.37             | 43         | 28.8 | 33               | 0.0         | 0.0              | <0.0001 |
| Heat   | 10  | DJ694 | 3.1  | ♀   | 1                | 40  | 15.5 | 21               | 40   | 14.9 | 21               | 40         | 19.1 | 24               | 22.7        | 14.3             |         |
| Heat   | 10  | DJ694 | 3.1  | ♀   | 2                | 41  | 35.6 | 45               | 40   | 33.3 | 36               | 40         | 32.0 | 33               | -3.9        | -8.3             |         |
| Heat   | 10  | DJ694 | 3.1  | ♀   | 3                | 35  | 36.0 | 40               | 41   | 35.3 | 40               | 41         | 37.2 | 40               | 3.4         | 0.0              |         |
| Heat   | 10  | DJ694 | 3.1  | ♀   | 4                | 40  | 32.8 | 40               | 39   | 31.3 | 33               | 38         | 31.9 | 36               | 0.0         | 0.0              | 0.1595  |
| Heat   | 10  | DJ694 | 3.1  | ♂   | 1                | 39  | 13.3 | 21               | 40   | 15.7 | 21               | 40         | 15.7 | 18               | 0.0         | -14.3            |         |
| Heat   | 10  | DJ694 | 3.1  | ♂   | 2                | 40  | 30.8 | 40               | 40   | 27.9 | 28               | 39         | 27.6 | 28               | -1.1        | 0.0              |         |
| Heat   | 10  | DJ694 | 3.1  | ♂   | 3                | 40  | 32.6 | 40               | 40   | 26.3 | 28               | 38         | 29.2 | 33               | 0.0         | 0.0              |         |
| Heat   | 10  | DJ694 | 3.1  | ♂   | 4                | 39  | 29.1 | 36               | 38   | 27.4 | 33               | 39         | 26.7 | 28               | -2.8        | -15.2            | 0.0795  |
| Heat   | 10  | DJ694 | 4.4  | ♀   | 1                | 39  | 17.6 | 21               | 40   | 18.9 | 21               | 40         | 20.4 | 21               | 7.9         | 0.0              | 0.0016  |
| Heat   | 10  | DJ694 | 4.4  | ♀   | 2                | 40  | 32.1 | 36               | 40   | 33.3 | 36               | 40         | 30.1 | 33               | -6.0        | -8.3             | 0.0009  |
| Heat   | 10  | DJ694 | 4.4  | ♀   | 3                | 40  | 34.5 | 40               | 41   | 35.3 | 40               | 40         | 31.1 | 33               | -9.9        | -17.5            | <0.0001 |
| Heat   | 10  | DJ694 | 4.4  | ♀   | 4                | 38  | 29.8 | 36               | 39   | 31.3 | 33               | 41         | 27.3 | 33               | -8.3        | 0.0              | 0.0014  |
| Heat   | 10  | DJ694 | 4.4  | ♂   | 1                | 39  | 13.9 | 17               | 40   | 16.0 | 17               | 38         | 13.8 | 17               | -0.6        | 0.0              | 0.9654  |
| Heat   | 10  | DJ694 | 4.4  | ♂   | 2                | 39  | 29.7 | 33               | 40   | 27.9 | 28               | 40         | 27.4 | 28               | -1.8        | 0.0              | 0.0493  |
| Heat   | 10  | DJ694 | 4.4  | ♂   | 3                | 39  | 29.9 | 33               | 40   | 26.3 | 28               | 40         | 27.0 | 28               | 0.0         | 0.0              | <0.0001 |
| Heat   | 10  | DJ694 | 4.4  | ♂   | 4                | 41  | 27.2 | 28               | 38   | 27.4 | 33               | 41         | 23.8 | 24               | -12.6       | -14.3            |         |
| Heat   | 10  | D42   | 2.1  | ♀   | 1                | 40  | 20.8 | 30               | 38   | 22.7 | 30               | 40         | 20.3 | 25               | -2.2        | -16.7            |         |
| Heat   | 10  | D42   | 2.1  | ♀   | 2                | 39  | 31.5 | 36               | 38   | 33.6 | 40               | 40         | 32.8 | 36               | 0.0         | 0.0              |         |
| Heat   | 10  | D42   | 2.1  | ♀   | 3                | 39  | 33.5 | 40               | 40   | 35.4 | 40               | 31         | 32.5 | 36               | -2.8        | -10.0            | 0.0001  |
| Heat   | 10  | D42   | 2.1  | ♀   | 4                | 36  | 30.1 | 33               | 40   | 28.8 | 36               | 40         | 28.9 | 36               | 0.0         | 0.0              | 0.4803  |
| Heat   | 10  | D42   | 2.1  | ♂   | 1                | 39  | 16.4 | 21               | 36   | 13.7 | 17               | 40         | 13.5 | 17               | -1.6        | 0.0              |         |
| Heat   | 10  | D42   | 2.1  | ♂   | 2                | 39  | 27.0 | 28               | 42   | 27.8 | 33               | 50         | 25.1 | 33               | -6.8        | 0.0              |         |
| Heat   | 10  | D42   | 2.1  | ♂   | 3                | 38  | 27.4 | 33               | 40   | 27.6 | 33               | 40         | 28.1 | 33               | 1.8         | 0.0              |         |
| Heat   | 10  | D42   | 2.1  | ♂   | 4                | 40  | 24.7 | 28               | 40   | 25.8 | 33               | 40         | 25.0 | 28               | 0.0         | 0.0              | 0.2837  |
| Heat   | 10  | D42   | 4.3  | ♀   | 1                | 26  | 17.5 | 21               | 39   | 21.3 | 30               | 40         | 19.3 | 21               | 0.0         | 0.0              |         |
| Heat   | 10  | D42   | 4.3  | ♀   | 2                | 39  | 31.2 | 36               | 38   | 33.6 | 40               | 40         | 32.0 | 36               | 0.0         | 0.0              |         |
| Heat   | 10  | D42   | 4.3  | ♀   | 3                | 41  | 32.2 | 36               | 40   | 35.4 | 40               | 39         | 34.7 | 40               | 0.0         | 0.0              |         |
| Heat   | 10  | D42   | 4.3  | ♀   | 4                | 38  | 29.1 | 33               | 40   | 28.8 | 36               | 40         | 29.3 | 33               | 0.9         | 0.0              | <0.0001 |
| Heat   | 10  | D42   | 4.3  | ♂   | 1                | 27  | 14.6 | 17               | 39   | 18.5 | 21               | 40         | 12.6 | 13               | -13.9       | -23.5            |         |
| Heat   | 10  | D42   | 4.3  | ♂   | 2                | 31  | 25.7 | 28               | 42   | 27.8 | 33               | 40         | 30.2 | 33               | 8.6         | 0.0              |         |
| Heat   | 10  | D42   | 4.3  | ♂   | 3                | 41  | 26.2 | 28               | 40   | 27.6 | 33               | 42         | 28.7 | 33               | 4.2         | 0.0              |         |
| Heat   | 10  | D42   | 4.3  | ♂   | 4                | 41  | 24.2 | 28               | 40   | 25.8 | 33               | 40         | 25.1 | 28               | 0.0         | 0.0              | 0.0047  |
| Heat   | 10  | D42   | 9.1  | ♀   | 1                | 39  | 31.8 | 36               | 38   | 33.6 | 40               | 40         | 34.1 | 40               | 1.5         | 0.0              |         |
| Heat   | 10  | D42   | 9.1  | ♀   | 2                | 40  | 32.8 | 40               | 40   | 35.4 | 40               | 40         | 34.7 | 40               | 0.0         | 0.0              |         |
| Heat   | 10  | D42   | 9.1  | ♀   | 3                | 39  | 29.3 | 33               | 40   | 28.8 | 36               | 39         | 31.5 | 33               | 7.3         | 0.0              |         |
| Heat   | 10  | D42   | 9.1  | ♂   | 1                | 40  | 25.8 | 28               | 42   | 27.8 | 33               | 39         | 27.9 | 33               | 0.5         | 0.0              | 0.6270  |
| Heat   | 10  | D42   | 9.1  | ♂   | 2                | 41  | 27.6 | 33               | 40   | 27.6 | 33               | 41         | 28.5 | 33               | 3.4         | 0.0              | 0.0760  |
| Heat   | 10  | D42   | 9.1  | ♂   | 3                | 43  | 25.1 | 28               | 40   | 25.8 | 33               | 38         | 23.8 | 28               | -5.3        | 0.0              | 0.0182  |
| Heat   | 10  | D42   | 3.2  | ♀   | 1                | 32  | 19.0 | 27               | 37   | 18.6 | 27               | 40         | 30.8 | 36               | 62.1        | 33.3             | <0.0001 |
| Heat   | 10  | D42   | 3.2  | ♀   | 2                | 39  | 35.3 | 40               | 38   | 33.6 | 40               | 40         | 36.3 | 40               | 3.0         | 0.0              | 0.0011  |

Table S2

| Stress   | Age | Gal4   | UAS  | Sex | Rep <sup>1</sup> | UAS |      |                  | Gal4 |      |                  | Gal4 + UAS |      |                  | % Extension |                  | P                 |
|----------|-----|--------|------|-----|------------------|-----|------|------------------|------|------|------------------|------------|------|------------------|-------------|------------------|-------------------|
|          |     |        |      |     |                  | n   | Mean | Max <sup>2</sup> | n    | Mean | Max <sup>2</sup> | n          | Mean | Max <sup>2</sup> | Mean        | Max <sup>2</sup> |                   |
| Heat     | 10  | D42    | 3.2  | ♀   | 3                | 40  | 36.6 | 40               | 40   | 35.4 | 40               | 40         | 37.7 | 40               | 3.2         | 0.0              | <b>0.0006</b>     |
| Heat     | 10  | D42    | 3.2  | ♀   | 4                | 37  | 32.0 | 40               | 40   | 28.8 | 36               | 44         | 36.3 | 45               | 13.4        | 12.5             | <b>&lt;0.0001</b> |
| Heat     | 10  | D42    | 3.2  | ♂   | 1                | 36  | 16.1 | 24               | 38   | 15.9 | 21               | 40         | 16.3 | 24               | 1.2         | 0.0              | 0.4681            |
| Heat     | 10  | D42    | 3.2  | ♂   | 2                | 40  | 33.5 | 40               | 42   | 27.8 | 33               | 41         | 31.9 | 36               | 0.0         | 0.0              |                   |
| Heat     | 10  | D42    | 3.2  | ♂   | 3                | 41  | 32.4 | 40               | 40   | 27.6 | 33               | 43         | 33.4 | 40               | 3.0         | 0.0              | 0.1824            |
| Heat     | 10  | D42    | 3.2  | ♂   | 4                | 43  | 30.3 | 36               | 40   | 25.8 | 33               | 37         | 31.1 | 36               | 2.5         | 0.0              | 0.4366            |
| Heat     | 10  | D42    | 10.1 | ♀   | 1                | 36  | 19.3 | 21               | 39   | 21.3 | 30               | 31         | 26.0 | 0.79             | 22.2        | 0.0              | <b>&lt;0.0001</b> |
| Heat     | 10  | D42    | 10.1 | ♀   | 2                | 41  | 34.1 | 40               | 38   | 33.6 | 40               | 39         | 31.7 | 0.68             | -5.5        | 12.5             | <b>0.0149</b>     |
| Heat     | 10  | D42    | 10.1 | ♀   | 3                | 41  | 36.1 | 45               | 40   | 35.4 | 40               | 40         | 29.1 | 1.33             | -17.7       | 0.0              | <b>0.0022</b>     |
| Heat     | 10  | D42    | 10.1 | ♀   | 4                | 39  | 33.4 | 40               | 40   | 28.8 | 36               | 41         | 34.3 | 0.5              | 2.9         | 0.0              | 0.2401            |
| Heat     | 10  | D42    | 10.1 | ♂   | 1                | 40  | 16.6 | 21               | 39   | 18.5 | 21               | 36         | 19.2 | 0.47             | 3.4         | 14.3             | <b>0.0002</b>     |
| Heat     | 10  | D42    | 10.1 | ♂   | 2                | 40  | 31.9 | 40               | 42   | 27.8 | 33               | 40         | 32.4 | 0.36             | 1.6         | 0.0              | 0.4031            |
| Heat     | 10  | D42    | 10.1 | ♂   | 3                | 42  | 32.5 | 40               | 40   | 27.6 | 33               | 47         | 33.3 | 0.41             | 2.7         | 0.0              | 0.4520            |
| Heat     | 10  | D42    | 10.1 | ♂   | 4                | 45  | 29.1 | 36               | 40   | 25.8 | 33               | 37         | 32.8 | 0.39             | 12.5        | 0.0              | <b>&lt;0.0001</b> |
| Heat     | 10  | D42    | 3.1  | ♀   | 1                | 40  | 15.5 | 21               | 37   | 18.6 | 27               | 40         | 18.4 | 24               | 0.0         | 0.0              |                   |
| Heat     | 10  | D42    | 3.1  | ♀   | 2                | 41  | 35.6 | 45               | 38   | 33.6 | 40               | 30         | 32.0 | 33               | -4.8        | -17.5            | <b>0.0371</b>     |
| Heat     | 10  | D42    | 3.1  | ♀   | 3                | 35  | 36.0 | 40               | 40   | 35.4 | 40               | 40         | 28.3 | 36               | -19.9       | -10.0            | <b>&lt;0.0001</b> |
| Heat     | 10  | D42    | 3.1  | ♀   | 4                | 40  | 32.8 | 40               | 40   | 28.8 | 36               | 40         | 31.6 | 36               | 0.0         | 0.0              |                   |
| Heat     | 10  | D42    | 3.1  | ♂   | 1                | 39  | 13.3 | 21               | 38   | 15.9 | 21               | 40         | 11.6 | 15               | -12.6       | -28.6            | <b>0.0115</b>     |
| Heat     | 10  | D42    | 3.1  | ♂   | 2                | 40  | 30.8 | 40               | 42   | 27.8 | 33               | 40         | 28.4 | 33               | 0.0         | 0.0              |                   |
| Heat     | 10  | D42    | 3.1  | ♂   | 3                | 40  | 32.6 | 40               | 40   | 27.6 | 33               | 40         | 28.6 | 33               | 0.0         | 0.0              |                   |
| Heat     | 10  | D42    | 3.1  | ♂   | 4                | 39  | 29.1 | 36               | 40   | 25.8 | 33               | 30         | 29.6 | 33               | 1.9         | 0.0              | 0.8362            |
| Heat     | 10  | D42    | 4.4  | ♀   | 1                | 39  | 17.6 | 21               | 39   | 21.3 | 30               | 40         | 23.3 | 30               | 9.4         | 0.0              | <b>0.0109</b>     |
| Heat     | 10  | D42    | 4.4  | ♀   | 2                | 40  | 32.1 | 36               | 38   | 33.6 | 40               | 38         | 34.6 | 40               | 3.0         | 0.0              | 0.2075            |
| Heat     | 10  | D42    | 4.4  | ♀   | 3                | 40  | 34.5 | 40               | 40   | 35.4 | 40               | 40         | 35.1 | 40               | 0.0         | 0.0              | 0.2551            |
| Heat     | 10  | D42    | 4.4  | ♀   | 4                | 38  | 29.8 | 36               | 40   | 28.8 | 36               | 39         | 33.6 | 36               | 13.0        | 0.0              | <b>&lt;0.0001</b> |
| Heat     | 10  | D42    | 4.4  | ♂   | 1                | 39  | 13.9 | 17               | 39   | 18.5 | 21               | 39         | 14.4 | 17               | 0.0         | 0.0              |                   |
| Heat     | 10  | D42    | 4.4  | ♂   | 2                | 39  | 29.7 | 33               | 42   | 27.8 | 33               | 40         | 29.4 | 33               | 0.0         | 0.0              |                   |
| Heat     | 10  | D42    | 4.4  | ♂   | 3                | 39  | 29.9 | 33               | 40   | 27.6 | 33               | 41         | 29.8 | 33               | 0.0         | 0.0              |                   |
| Heat     | 10  | D42    | 4.4  | ♂   | 4                | 41  | 27.2 | 28               | 40   | 25.8 | 33               | 39         | 31.0 | 33               | 13.7        | 0.0              | <b>&lt;0.0001</b> |
| Paraquat | 3   | daGal4 | 2.1  | ♀   | 1                | 40  | 29.4 | 47               | 40   | 25.0 | 42               | 40         | 24.6 | 52               | -1.5        | 10.6             | 0.0802            |
| Paraquat | 3   | daGal4 | 2.1  | ♀   | 2                | 40  | 18.9 | 30               | 40   | 14.4 | 20               | 40         | 15.3 | 20               | 0.0         | 0.0              |                   |
| Paraquat | 3   | daGal4 | 2.1  | ♀   | 3                | 40  | 55.9 | 90               | 38   | 51.3 | 90               | 38         | 49.9 | 90               | -2.6        | 0.0              | 0.7017            |
| Paraquat | 3   | daGal4 | 2.1  | ♀   | 4                | 40  | 17.8 | 25               | 40   | 13.6 | 20               | 40         | 15.5 | 20               | 0.0         | 0.0              |                   |
| Paraquat | 3   | daGal4 | 2.1  | ♀   | 5                | 37  | 56.4 | 84               | 40   | 43.6 | 90               | 39         | 42.1 | 90               | -3.4        | 0.0              | <b>0.0348</b>     |
| Paraquat | 3   | daGal4 | 2.1  | ♀   | 6                | 42  | 50.9 | 84               | 39   | 41.6 | 74               | 39         | 45.3 | 90               | 0.0         | 7.1              |                   |
| Paraquat | 3   | daGal4 | 2.1  | ♂   | 1                | 40  | 27.5 | 57               | 40   | 22.5 | 42               | 40         | 18.6 | 32               | -17.2       | -23.8            | <b>0.0199</b>     |
| Paraquat | 3   | daGal4 | 2.1  | ♂   | 2                | 40  | 17.9 | 25               | 40   | 14.1 | 20               | 40         | 14.8 | 25               | 0.0         | 0.0              |                   |
| Paraquat | 3   | daGal4 | 2.1  | ♂   | 3                | 40  | 35.5 | 66               | 41   | 22.8 | 34               | 41         | 28.2 | 66               | 0.0         | 0.0              |                   |
| Paraquat | 3   | daGal4 | 2.1  | ♂   | 4                | 40  | 17.8 | 25               | 40   | 14.1 | 20               | 40         | 13.8 | 20               | -2.7        | 0.0              | <b>0.0001</b>     |
| Paraquat | 3   | daGal4 | 2.1  | ♂   | 5                | 34  | 40.2 | 84               | 40   | 26.6 | 50               | 40         | 27.6 | 50               | 0.0         | 0.0              |                   |
| Paraquat | 3   | daGal4 | 2.1  | ♂   | 6                | 41  | 39.0 | 84               | 42   | 23.1 | 38               | 40         | 27.2 | 50               | 0.0         | 0.0              |                   |
| Paraquat | 3   | daGal4 | 4.3  | ♀   | 1                | 40  | 30.8 | 43               | 40   | 38.8 | 56               | 40         | 28.5 | 56               | -7.5        | 0.0              | <b>0.0012</b>     |
| Paraquat | 3   | daGal4 | 4.3  | ♀   | 2                | 42  | 49.1 | 84               | 38   | 51.3 | 90               | 40         | 40.9 | 74               | -16.9       | -11.9            | <b>0.0135</b>     |
| Paraquat | 3   | daGal4 | 4.3  | ♀   | 3                | 41  | 39.3 | 74               | 40   | 43.6 | 90               | 37         | 34.5 | 58               | -12.0       | -21.6            | <b>0.0263</b>     |
| Paraquat | 3   | daGal4 | 4.3  | ♀   | 4                | 40  | 43.2 | 74               | 39   | 41.6 | 74               | 41         | 45.1 | 74               | 4.3         | 0.0              | 0.2569            |
| Paraquat | 3   | daGal4 | 4.3  | ♂   | 1                | 40  | 27.8 | 56               | 40   | 29.4 | 69               | 40         | 32.2 | 69               | 9.4         | 0.0              | 0.2330            |
| Paraquat | 3   | daGal4 | 4.3  | ♂   | 2                | 50  | 42.9 | 84               | 41   | 22.8 | 34               | 40         | 30.5 | 74               | 0.0         | 0.0              |                   |
| Paraquat | 3   | daGal4 | 4.3  | ♂   | 3                | 41  | 41.6 | 110              | 40   | 26.6 | 50               | 40         | 39.7 | 84               | 0.0         | 0.0              |                   |

Table S2

| Stress   | Age | Gal4   | UAS  | Sex | Rep <sup>1</sup> | UAS |      |                  | Gal4 |      |                  | Gal4 + UAS |      |                  | % Extension |                  | P             |
|----------|-----|--------|------|-----|------------------|-----|------|------------------|------|------|------------------|------------|------|------------------|-------------|------------------|---------------|
|          |     |        |      |     |                  | n   | Mean | Max <sup>2</sup> | n    | Mean | Max <sup>2</sup> | n          | Mean | Max <sup>2</sup> | Mean        | Max <sup>2</sup> |               |
| Paraquat | 3   | daGal4 | 4.3  | ♂   | 4                | 41  | 46.7 | 84               | 42   | 23.1 | 38               | 36         | 48.2 | 90               | 3.2         | 7.1              | 0.8014        |
| Paraquat | 3   | daGal4 | 9.1  | ♀   | 1                | 39  | 21.2 | 32               | 36   | 16.9 | 32               | 39         | 23.0 | 41               | 8.6         | 28.1             | <b>0.0002</b> |
| Paraquat | 3   | daGal4 | 9.1  | ♀   | 2                | 39  | 54.4 | 90               | 38   | 51.3 | 90               | 40         | 40.7 | 84               | -20.7       | -6.7             | <b>0.0063</b> |
| Paraquat | 3   | daGal4 | 9.1  | ♀   | 3                | 40  | 21.5 | 32               | 37   | 18.5 | 32               | 40         | 17.8 | 23               | -3.6        | -28.1            | <b>0.0162</b> |
| Paraquat | 3   | daGal4 | 9.1  | ♀   | 4                | 39  | 55.1 | 84               | 40   | 43.6 | 90               | 42         | 34.2 | 58               | -21.5       | -31.0            | <b>0.0262</b> |
| Paraquat | 3   | daGal4 | 9.1  | ♀   | 5                | 46  | 49.4 | 90               | 39   | 41.6 | 74               | 40         | 41.2 | 84               | -0.9        | 0.0              | <b>0.0313</b> |
| Paraquat | 3   | daGal4 | 9.1  | ♂   | 1                | 40  | 14.7 | 23               | 39   | 17.6 | 32               | 40         | 14.3 | 23               | -3.1        | 0.0              | <b>0.0088</b> |
| Paraquat | 3   | daGal4 | 9.1  | ♂   | 2                | 42  | 31.0 | 66               | 41   | 22.8 | 34               | 40         | 31.1 | 58               | 0.5         | 0.0              | <b>0.0004</b> |
| Paraquat | 3   | daGal4 | 9.1  | ♂   | 3                | 40  | 15.7 | 23               | 40   | 15.1 | 23               | 38         | 13.6 | 23               | -9.7        | 0.0              | <b>0.0249</b> |
| Paraquat | 3   | daGal4 | 9.1  | ♂   | 4                | 34  | 38.2 | 74               | 40   | 26.6 | 50               | 43         | 26.8 | 50               | 0.0         | 0.0              |               |
| Paraquat | 3   | daGal4 | 9.1  | ♂   | 5                | 39  | 31.2 | 66               | 42   | 23.1 | 38               | 39         | 25.7 | 46               | 0.0         | 0.0              |               |
| Paraquat | 3   | daGal4 | 3.2  | ♀   | 1                | 40  | 30.7 | 80               | 40   | 27.8 | 65               | 40         | 31.1 | 75               | 1.3         | 0.0              | 0.2841        |
| Paraquat | 3   | daGal4 | 3.2  | ♀   | 2                | 36  | 69.0 | 118              | 38   | 51.3 | 90               | 40         | 50.8 | 110              | -1.0        | 0.0              | <b>0.0110</b> |
| Paraquat | 3   | daGal4 | 3.2  | ♀   | 3                | 38  | 67.4 | 110              | 40   | 43.6 | 90               | 42         | 54.8 | 90               | 0.0         | 0.0              |               |
| Paraquat | 3   | daGal4 | 3.2  | ♀   | 4                | 40  | 60.2 | 110              | 39   | 41.6 | 74               | 40         | 41.9 | 110              | 0.0         | 0.0              |               |
| Paraquat | 3   | daGal4 | 3.2  | ♂   | 1                | 40  | 33.9 | 80               | 40   | 25.1 | 51               | 40         | 42.1 | 94               | 24.0        | 17.5             | <b>0.0005</b> |
| Paraquat | 3   | daGal4 | 3.2  | ♂   | 2                | 39  | 54.8 | 90               | 41   | 22.8 | 34               | 41         | 51.2 | 110              | 0.0         | 22.2             |               |
| Paraquat | 3   | daGal4 | 3.2  | ♂   | 3                | 40  | 62.8 | 110              | 40   | 26.6 | 50               | 41         | 41.6 | 110              | 0.0         | 0.0              |               |
| Paraquat | 3   | daGal4 | 3.2  | ♂   | 4                | 37  | 64.3 | 110              | 42   | 23.1 | 38               | 40         | 52.2 | 118              | 0.0         | 7.3              |               |
| Paraquat | 3   | daGal4 | 10.1 | ♀   | 1                | 40  | 41.6 | 117              | 40   | 42.5 | 81               | 39         | 54.3 | 105              | 27.6        | 0.0              | <b>0.0252</b> |
| Paraquat | 3   | daGal4 | 10.1 | ♀   | 2                | 40  | 23.7 | 41               | 36   | 16.9 | 32               | 40         | 22.3 | 41               | 0.0         | 0.0              |               |
| Paraquat | 3   | daGal4 | 10.1 | ♀   | 3                | 28  | 66.1 | 90               | 38   | 51.3 | 90               | 42         | 67.0 | 110              | 1.5         | 22.2             | <b>0.0101</b> |
| Paraquat | 3   | daGal4 | 10.1 | ♀   | 4                | 40  | 24.3 | 59               | 37   | 18.5 | 32               | 40         | 23.1 | 41               | 0.0         | 0.0              |               |
| Paraquat | 3   | daGal4 | 10.1 | ♀   | 5                | 39  | 88.3 | 118              | 40   | 43.6 | 90               | 41         | 60.0 | 110              | 0.0         | 0.0              |               |
| Paraquat | 3   | daGal4 | 10.1 | ♀   | 6                | 37  | 78.3 | 110              | 39   | 41.6 | 74               | 40         | 59.6 | 110              | 0.0         | 0.0              |               |
| Paraquat | 3   | daGal4 | 10.1 | ♂   | 1                | 40  | 63.7 | 117              | 40   | 34.0 | 69               | 40         | 69.0 | 129              | 8.4         | 10.3             | 0.2277        |
| Paraquat | 3   | daGal4 | 10.1 | ♂   | 2                | 40  | 23.3 | 41               | 39   | 17.6 | 32               | 39         | 21.6 | 41               | 0.0         | 0.0              |               |
| Paraquat | 3   | daGal4 | 10.1 | ♂   | 3                | 39  | 47.5 | 90               | 41   | 22.8 | 34               | 43         | 42.5 | 110              | 0.0         | 22.2             |               |
| Paraquat | 3   | daGal4 | 10.1 | ♂   | 4                | 40  | 28.3 | 41               | 40   | 15.1 | 23               | 38         | 18.7 | 32               | 0.0         | 0.0              |               |
| Paraquat | 3   | daGal4 | 10.1 | ♂   | 5                | 39  | 73.1 | 130              | 40   | 26.6 | 50               | 41         | 42.6 | 110              | 0.0         | 0.0              |               |
| Paraquat | 3   | daGal4 | 10.1 | ♂   | 6                | 42  | 59.0 | 110              | 42   | 23.1 | 38               | 40         | 38.9 | 90               | 0.0         | 0.0              |               |
| Paraquat | 3   | daGal4 | 3.1  | ♀   | 1                | 40  | 33.4 | 64               | 40   | 36.4 | 64               | 40         | 35.0 | 64               | 0.0         | 0.0              |               |
| Paraquat | 3   | daGal4 | 3.1  | ♀   | 2                | 40  | 16.0 | 25               | 40   | 14.4 | 20               | 40         | 17.4 | 25               | 8.6         | 0.0              | <b>0.0011</b> |
| Paraquat | 3   | daGal4 | 3.1  | ♀   | 3                | 40  | 46.1 | 74               | 38   | 51.3 | 90               | 40         | 55.4 | 90               | 8.1         | 0.0              | <b>0.0016</b> |
| Paraquat | 3   | daGal4 | 3.1  | ♀   | 4                | 40  | 18.0 | 30               | 40   | 13.6 | 20               | 40         | 16.5 | 25               | 0.0         | 0.0              |               |
| Paraquat | 3   | daGal4 | 3.1  | ♀   | 5                | 36  | 50.6 | 84               | 40   | 43.6 | 90               | 41         | 58.1 | 84               | 14.8        | 0.0              | <b>0.0242</b> |
| Paraquat | 3   | daGal4 | 3.1  | ♀   | 6                | 44  | 49.4 | 74               | 39   | 41.6 | 74               | 39         | 59.9 | 110              | 21.4        | 48.6             | <b>0.0048</b> |
| Paraquat | 3   | daGal4 | 3.1  | ♂   | 1                | 40  | 23.3 | 39               | 40   | 26.8 | 55               | 40         | 38.8 | 82               | 44.8        | 49.1             | <b>0.0002</b> |
| Paraquat | 3   | daGal4 | 3.1  | ♂   | 2                | 40  | 18.8 | 40               | 40   | 14.1 | 20               | 40         | 24.1 | 64               | 28.7        | 60.0             | <b>0.0373</b> |
| Paraquat | 3   | daGal4 | 3.1  | ♂   | 3                | 45  | 41.4 | 90               | 41   | 22.8 | 34               | 41         | 59.2 | 110              | 42.8        | 22.2             | <b>0.0009</b> |
| Paraquat | 3   | daGal4 | 3.1  | ♂   | 4                | 40  | 19.3 | 25               | 40   | 14.1 | 20               | 40         | 21.6 | 49               | 12.1        | 96.0             | 0.2077        |
| Paraquat | 3   | daGal4 | 3.1  | ♂   | 5                | 39  | 41.6 | 84               | 40   | 26.6 | 50               | 41         | 53.8 | 110              | 29.1        | 31.0             | <b>0.0115</b> |
| Paraquat | 3   | daGal4 | 3.1  | ♂   | 6                | 41  | 44.3 | 84               | 42   | 23.1 | 38               | 42         | 57.3 | 110              | 29.3        | 31.0             | <b>0.0259</b> |
| Paraquat | 3   | daGal4 | 4.4  | ♀   | 1                | 40  | 45.4 | 69               | 40   | 38.8 | 56               | 40         | 45.0 | 81               | 0.0         | 17.4             |               |
| Paraquat | 3   | daGal4 | 4.4  | ♀   | 2                | 40  | 26.5 | 41               | 36   | 16.9 | 32               | 39         | 22.0 | 41               | 0.0         | 0.0              |               |
| Paraquat | 3   | daGal4 | 4.4  | ♀   | 3                | 36  | 53.7 | 90               | 38   | 51.3 | 90               | 41         | 46.9 | 110              | -8.5        | 22.2             | 0.3531        |
| Paraquat | 3   | daGal4 | 4.4  | ♀   | 4                | 40  | 28.2 | 48               | 37   | 18.5 | 32               | 43         | 20.0 | 41               | 0.0         | 0.0              |               |
| Paraquat | 3   | daGal4 | 4.4  | ♀   | 5                | 40  | 67.1 | 110              | 40   | 43.6 | 90               | 39         | 43.9 | 90               | 0.0         | 0.0              |               |
| Paraquat | 3   | daGal4 | 4.4  | ♀   | 6                | 41  | 57.2 | 90               | 39   | 41.6 | 74               | 41         | 40.6 | 84               | -2.4        | 0.0              | <b>0.0023</b> |



Table S2

| Stress   | Age | Gal4   | UAS  | Sex | Rep <sup>1</sup> | UAS |      |                  | Gal4 |      |                  | Gal4 + UAS |      |                  | % Extension |                  | P                 |
|----------|-----|--------|------|-----|------------------|-----|------|------------------|------|------|------------------|------------|------|------------------|-------------|------------------|-------------------|
|          |     |        |      |     |                  | n   | Mean | Max <sup>2</sup> | n    | Mean | Max <sup>2</sup> | n          | Mean | Max <sup>2</sup> | Mean        | Max <sup>2</sup> |                   |
| Paraquat | 3   | daGal4 | 4.4  | ♂   | 1                | 40  | 39.2 | 81               | 40   | 29.4 | 69               | 40         | 46.8 | 105              | 19.3        | 29.6             | <b>0.0002</b>     |
| Paraquat | 3   | daGal4 | 4.4  | ♂   | 2                | 39  | 19.1 | 32               | 39   | 17.6 | 32               | 39         | 17.7 | 59               | 0.0         | 84.4             | <b>0.0444</b>     |
| Paraquat | 3   | daGal4 | 4.4  | ♂   | 3                | 41  | 37.7 | 84               | 41   | 22.8 | 34               | 41         | 49.6 | 110              | 31.6        | 31.0             |                   |
| Paraquat | 3   | daGal4 | 4.4  | ♂   | 4                | 40  | 19.3 | 32               | 40   | 15.1 | 23               | 41         | 16.7 | 23               | 0.0         | 0.0              |                   |
| Paraquat | 3   | daGal4 | 4.4  | ♂   | 5                | 40  | 57.9 | 110              | 40   | 26.6 | 50               | 42         | 40.4 | 84               | 0.0         | 0.0              |                   |
| Paraquat | 3   | daGal4 | 4.4  | ♂   | 6                | 40  | 43.0 | 110              | 42   | 23.1 | 38               | 40         | 32.1 | 84               | 0.0         | 0.0              |                   |
| Paraquat | 3   | DJ694  | 2.1  | ♀   | 1                | 40  | 29.5 | 51               | 40   | 20.7 | 35               | 40         | 20.2 | 40               | -2.5        | 0.0              | 0.7691            |
| Paraquat | 3   | DJ694  | 2.1  | ♀   | 2                | 40  | 29.4 | 47               | 40   | 18.6 | 27               | 40         | 19.9 | 32               | 0.0         | 0.0              | 0.0938            |
| Paraquat | 3   | DJ694  | 2.1  | ♀   | 3                | 40  | 18.9 | 30               | 40   | 15.6 | 25               | 40         | 14.1 | 20               | -9.6        | -20.0            |                   |
| Paraquat | 3   | DJ694  | 2.1  | ♀   | 4                | 40  | 55.9 | 90               | 24   | 56.7 | 84               | 39         | 45.8 | 84               | -17.9       | 0.0              |                   |
| Paraquat | 3   | DJ694  | 2.1  | ♀   | 5                | 40  | 17.8 | 25               | 40   | 15.6 | 20               | 40         | 14.5 | 20               | -7.2        | 0.0              |                   |
| Paraquat | 3   | DJ694  | 2.1  | ♀   | 6                | 37  | 56.4 | 84               | 39   | 77.6 | 130              | 39         | 41.4 | 90               | -26.6       | 0.0              |                   |
| Paraquat | 3   | DJ694  | 2.1  | ♀   | 7                | 42  | 50.9 | 84               | 42   | 65.7 | 118              | 40         | 46.2 | 110              | -9.2        | 0.0              | <b>0.0027</b>     |
| Paraquat | 3   | DJ694  | 2.1  | ♂   | 1                | 40  | 25.2 | 40               | 40   | 16.6 | 22               | 40         | 19.3 | 30               | 0.0         | 0.0              | <b>0.0294</b>     |
| Paraquat | 3   | DJ694  | 2.1  | ♂   | 2                | 40  | 27.5 | 57               | 38   | 19.1 | 22               | 40         | 17.4 | 22               | -9.1        | 0.0              |                   |
| Paraquat | 3   | DJ694  | 2.1  | ♂   | 3                | 40  | 17.9 | 25               | 40   | 18.0 | 30               | 40         | 17.6 | 30               | -1.4        | 0.0              |                   |
| Paraquat | 3   | DJ694  | 2.1  | ♂   | 4                | 40  | 35.5 | 66               | 45   | 21.5 | 38               | 50         | 36.6 | 74               | 3.0         | 12.1             |                   |
| Paraquat | 3   | DJ694  | 2.1  | ♂   | 5                | 40  | 17.8 | 25               | 40   | 17.5 | 25               | 40         | 19.1 | 30               | 7.7         | 20.0             |                   |
| Paraquat | 3   | DJ694  | 2.1  | ♂   | 6                | 34  | 40.2 | 84               | 41   | 20.0 | 34               | 38         | 24.1 | 42               | 0.0         | 0.0              | 0.1967            |
| Paraquat | 3   | DJ694  | 2.1  | ♂   | 7                | 41  | 39.0 | 84               | 41   | 22.5 | 34               | 40         | 28.7 | 66               | 0.0         | 0.0              |                   |
| Paraquat | 3   | DJ694  | 4.3  | ♀   | 1                | 40  | 30.8 | 43               | 40   | 30.9 | 56               | 40         | 20.9 | 31               | -32.3       | -27.9            | <b>&lt;0.0001</b> |
| Paraquat | 3   | DJ694  | 4.3  | ♀   | 2                | 42  | 49.1 | 84               | 24   | 56.7 | 84               | 35         | 39.9 | 66               | -18.7       | -21.4            | <b>0.0006</b>     |
| Paraquat | 3   | DJ694  | 4.3  | ♀   | 3                | 41  | 39.3 | 74               | 39   | 77.6 | 130              | 37         | 54.2 | 84               | 0.0         | 0.0              | 0.3893            |
| Paraquat | 3   | DJ694  | 4.3  | ♀   | 4                | 40  | 43.2 | 74               | 42   | 65.7 | 118              | 39         | 40.1 | 66               | -7.2        | -10.8            |                   |
| Paraquat | 3   | DJ694  | 4.3  | ♂   | 1                | 40  | 27.8 | 56               | 40   | 15.3 | 22               | 40         | 18.0 | 43               | 0.0         | 0.0              |                   |
| Paraquat | 3   | DJ694  | 4.3  | ♂   | 2                | 50  | 42.9 | 84               | 45   | 21.5 | 38               | 41         | 25.4 | 38               | 0.0         | 0.0              |                   |
| Paraquat | 3   | DJ694  | 4.3  | ♂   | 3                | 41  | 41.6 | 110              | 41   | 20.0 | 34               | 40         | 26.5 | 34               | 0.0         | 0.0              |                   |
| Paraquat | 3   | DJ694  | 4.3  | ♂   | 4                | 41  | 46.7 | 84               | 41   | 22.5 | 34               | 39         | 28.8 | 50               | 0.0         | 0.0              | <b>0.0006</b>     |
| Paraquat | 3   | DJ694  | 9.1  | ♀   | 1                | 39  | 21.2 | 32               | 40   | 16.6 | 23               | 40         | 16.6 | 32               | 0.0         | 0.0              |                   |
| Paraquat | 3   | DJ694  | 9.1  | ♀   | 2                | 39  | 54.4 | 90               | 24   | 56.7 | 84               | 38         | 43.9 | 66               | -19.3       | -21.4            |                   |
| Paraquat | 3   | DJ694  | 9.1  | ♀   | 3                | 40  | 21.5 | 32               | 39   | 18.5 | 32               | 39         | 21.2 | 32               | 0.0         | 0.0              |                   |
| Paraquat | 3   | DJ694  | 9.1  | ♀   | 4                | 39  | 55.1 | 84               | 39   | 77.6 | 130              | 40         | 45.3 | 66               | -17.8       | -21.4            |                   |
| Paraquat | 3   | DJ694  | 9.1  | ♀   | 5                | 46  | 49.4 | 90               | 42   | 65.7 | 118              | 41         | 46.7 | 74               | -5.4        | -17.8            | <b>0.0002</b>     |
| Paraquat | 3   | DJ694  | 9.1  | ♂   | 1                | 40  | 14.7 | 23               | 40   | 13.1 | 16               | 40         | 12.9 | 16               | -1.3        | 0.0              | <b>0.0042</b>     |
| Paraquat | 3   | DJ694  | 9.1  | ♂   | 2                | 42  | 31.0 | 66               | 45   | 21.5 | 38               | 41         | 22.5 | 30               | 0.0         | -21.1            | <b>0.0061</b>     |
| Paraquat | 3   | DJ694  | 9.1  | ♂   | 3                | 40  | 15.7 | 23               | 40   | 15.1 | 16               | 39         | 13.4 | 16               | -10.7       | 0.0              |                   |
| Paraquat | 3   | DJ694  | 9.1  | ♂   | 4                | 34  | 38.2 | 74               | 41   | 20.0 | 34               | 42         | 20.3 | 42               | 0.0         | 0.0              |                   |
| Paraquat | 3   | DJ694  | 9.1  | ♂   | 5                | 39  | 31.2 | 66               | 41   | 22.5 | 34               | 40         | 25.3 | 42               | 0.0         | 0.0              |                   |
| Paraquat | 3   | DJ694  | 3.2  | ♀   | 1                | 40  | 30.7 | 80               | 40   | 25.7 | 45               | 40         | 43.0 | 94               | 40.4        | 17.5             | <b>0.0049</b>     |
| Paraquat | 3   | DJ694  | 3.2  | ♀   | 2                | 36  | 69.0 | 118              | 24   | 56.7 | 84               | 29         | 43.8 | 110              | -22.7       | 0.0              | <b>0.0006</b>     |
| Paraquat | 3   | DJ694  | 3.2  | ♀   | 3                | 38  | 67.4 | 110              | 39   | 77.6 | 130              | 42         | 57.3 | 110              | -15.0       | 0.0              | <b>0.0135</b>     |
| Paraquat | 3   | DJ694  | 3.2  | ♀   | 4                | 40  | 60.2 | 110              | 42   | 65.7 | 118              | 42         | 69.3 | 118              | 5.6         | 0.0              | 0.0540            |
| Paraquat | 3   | DJ694  | 3.2  | ♂   | 1                | 40  | 33.9 | 80               | 40   | 21.6 | 35               | 40         | 40.7 | 94               | 20.0        | 17.5             | 0.1150            |
| Paraquat | 3   | DJ694  | 3.2  | ♂   | 2                | 39  | 54.8 | 90               | 45   | 21.5 | 38               | 44         | 34.4 | 74               | 0.0         | 0.0              | <b>&lt;0.0001</b> |
| Paraquat | 3   | DJ694  | 3.2  | ♂   | 3                | 40  | 62.8 | 110              | 41   | 20.0 | 34               | 40         | 35.5 | 84               | 0.0         | 0.0              |                   |
| Paraquat | 3   | DJ694  | 3.2  | ♂   | 4                | 37  | 64.3 | 110              | 41   | 22.5 | 34               | 39         | 40.4 | 90               | 0.0         | 0.0              |                   |
| Paraquat | 3   | DJ694  | 10.1 | ♀   | 1                | 40  | 41.6 | 117              | 40   | 60.1 | 117              | 40         | 89.8 | 129              | 49.5        | 10.3             |                   |
| Paraquat | 3   | DJ694  | 10.1 | ♀   | 2                | 40  | 23.7 | 41               | 40   | 16.6 | 23               | 40         | 23.3 | 41               | 0.0         | 0.0              |                   |
| Paraquat | 3   | DJ694  | 10.1 | ♀   | 3                | 28  | 66.1 | 90               | 24   | 56.7 | 84               | 34         | 43.9 | 110              | -22.5       | 22.2             | <b>0.0158</b>     |

Table S2

| Stress   | Age | Gal4  | UAS  | Sex | Rep <sup>1</sup> | UAS |      |                  | Gal4 |      |                  | Gal4 + UAS |      |                  | % Extension |                  | P                 |
|----------|-----|-------|------|-----|------------------|-----|------|------------------|------|------|------------------|------------|------|------------------|-------------|------------------|-------------------|
|          |     |       |      |     |                  | n   | Mean | Max <sup>2</sup> | n    | Mean | Max <sup>2</sup> | n          | Mean | Max <sup>2</sup> | Mean        | Max <sup>2</sup> |                   |
| Paraquat | 3   | DJ694 | 10.1 | ♀   | 4                | 40  | 24.3 | 59               | 39   | 18.5 | 32               | 39         | 26.0 | 59               | 6.9         | 0.0              | <b>0.0003</b>     |
| Paraquat | 3   | DJ694 | 10.1 | ♀   | 5                | 39  | 88.3 | 118              | 39   | 77.6 | 130              | 46         | 50.8 | 110              | -34.5       | -6.8             | <b>0.0005</b>     |
| Paraquat | 3   | DJ694 | 10.1 | ♀   | 6                | 37  | 78.3 | 110              | 42   | 65.7 | 118              | 30         | 57.5 | 110              | -12.4       | 0.0              | <b>0.0142</b>     |
| Paraquat | 3   | DJ694 | 10.1 | ♂   | 1                | 40  | 63.7 | 117              | 39   | 33.1 | 81               | 40         | 79.0 | 141              | 24.0        | 20.5             | <b>0.0160</b>     |
| Paraquat | 3   | DJ694 | 10.1 | ♂   | 2                | 40  | 23.3 | 41               | 40   | 13.1 | 16               | 34         | 18.7 | 32               | 0.0         | 0.0              |                   |
| Paraquat | 3   | DJ694 | 10.1 | ♂   | 3                | 39  | 47.5 | 90               | 45   | 21.5 | 38               | 46         | 35.3 | 74               | 0.0         | 0.0              |                   |
| Paraquat | 3   | DJ694 | 10.1 | ♂   | 4                | 40  | 28.3 | 41               | 40   | 15.1 | 16               | 37         | 22.1 | 41               | 0.0         | 0.0              |                   |
| Paraquat | 3   | DJ694 | 10.1 | ♂   | 5                | 39  | 73.1 | 130              | 41   | 20.0 | 34               | 26         | 40.2 | 84               | 0.0         | 0.0              |                   |
| Paraquat | 3   | DJ694 | 10.1 | ♂   | 6                | 42  | 59.0 | 110              | 41   | 22.5 | 34               | 39         | 34.7 | 90               | 0.0         | 0.0              |                   |
| Paraquat | 3   | DJ694 | 3.1  | ♀   | 1                | 40  | 31.4 | 45               | 40   | 20.7 | 35               | 40         | 22.6 | 35               | 0.0         | 0.0              |                   |
| Paraquat | 3   | DJ694 | 3.1  | ♀   | 2                | 40  | 33.4 | 64               | 40   | 40.1 | 76               | 40         | 28.5 | 64               | -14.7       | 0.0              | <b>0.0009</b>     |
| Paraquat | 3   | DJ694 | 3.1  | ♀   | 3                | 40  | 16.0 | 25               | 40   | 15.6 | 25               | 40         | 13.0 | 15               | -16.8       | -40.0            | <b>0.0002</b>     |
| Paraquat | 3   | DJ694 | 3.1  | ♀   | 4                | 40  | 46.1 | 74               | 24   | 56.7 | 84               | 37         | 53.7 | 90               | 0.0         | 7.1              |                   |
| Paraquat | 3   | DJ694 | 3.1  | ♀   | 5                | 40  | 18.0 | 30               | 40   | 15.6 | 20               | 40         | 13.6 | 20               | -12.8       | 0.0              | <b>0.0076</b>     |
| Paraquat | 3   | DJ694 | 3.1  | ♀   | 6                | 36  | 50.6 | 84               | 39   | 77.6 | 130              | 41         | 42.1 | 110              | -16.8       | 0.0              | 0.1365            |
| Paraquat | 3   | DJ694 | 3.1  | ♀   | 7                | 44  | 49.4 | 74               | 42   | 65.7 | 118              | 40         | 47.1 | 90               | -4.7        | 0.0              | <b>0.0008</b>     |
| Paraquat | 3   | DJ694 | 3.1  | ♂   | 1                | 40  | 30.5 | 57               | 40   | 16.6 | 22               | 40         | 27.1 | 63               | 0.0         | 10.5             |                   |
| Paraquat | 3   | DJ694 | 3.1  | ♂   | 2                | 40  | 23.3 | 39               | 40   | 18.9 | 25               | 40         | 21.5 | 35               | 0.0         | 0.0              |                   |
| Paraquat | 3   | DJ694 | 3.1  | ♂   | 3                | 40  | 18.8 | 40               | 40   | 18.0 | 30               | 40         | 20.1 | 40               | 7.2         | 0.0              | 0.1637            |
| Paraquat | 3   | DJ694 | 3.1  | ♂   | 4                | 45  | 41.4 | 90               | 45   | 21.5 | 38               | 54         | 42.6 | 84               | 2.7         | 0.0              | 0.7185            |
| Paraquat | 3   | DJ694 | 3.1  | ♂   | 5                | 40  | 19.3 | 25               | 40   | 17.5 | 25               | 40         | 19.9 | 30               | 3.2         | 20.0             | 0.0502            |
| Paraquat | 3   | DJ694 | 3.1  | ♂   | 6                | 39  | 41.6 | 84               | 41   | 20.0 | 34               | 39         | 33.5 | 90               | 0.0         | 7.1              |                   |
| Paraquat | 3   | DJ694 | 3.1  | ♂   | 7                | 41  | 44.3 | 84               | 41   | 22.5 | 34               | 44         | 37.1 | 58               | 0.0         | 0.0              |                   |
| Paraquat | 3   | DJ694 | 4.4  | ♀   | 1                | 40  | 35.5 | 58               | 40   | 45.1 | 67               | 40         | 55.8 | 97               | 23.8        | 44.8             | <b>0.0047</b>     |
| Paraquat | 3   | DJ694 | 4.4  | ♀   | 2                | 40  | 45.4 | 69               | 40   | 30.9 | 56               | 40         | 28.1 | 56               | -9.0        | 0.0              | 0.3708            |
| Paraquat | 3   | DJ694 | 4.4  | ♀   | 3                | 40  | 26.5 | 41               | 40   | 16.6 | 23               | 40         | 21.0 | 32               | 0.0         | 0.0              |                   |
| Paraquat | 3   | DJ694 | 4.4  | ♀   | 4                | 36  | 53.7 | 90               | 24   | 56.7 | 84               | 40         | 52.8 | 110              | -1.7        | 22.2             | 0.5266            |
| Paraquat | 3   | DJ694 | 4.4  | ♀   | 5                | 40  | 28.2 | 48               | 39   | 18.5 | 32               | 40         | 23.0 | 32               | 0.0         | 0.0              |                   |
| Paraquat | 3   | DJ694 | 4.4  | ♀   | 6                | 40  | 67.1 | 110              | 39   | 77.6 | 130              | 39         | 46.5 | 74               | -30.7       | -32.7            | <b>&lt;0.0001</b> |
| Paraquat | 3   | DJ694 | 4.4  | ♀   | 7                | 41  | 57.2 | 90               | 42   | 65.7 | 118              | 46         | 50.6 | 110              | -11.5       | 0.0              | <b>0.0091</b>     |
| Paraquat | 3   | DJ694 | 4.4  | ♂   | 1                | 40  | 38.7 | 67               | 40   | 25.5 | 34               | 40         | 34.2 | 77               | 0.0         | 14.9             |                   |
| Paraquat | 3   | DJ694 | 4.4  | ♂   | 2                | 40  | 39.2 | 81               | 40   | 15.3 | 22               | 40         | 20.1 | 31               | 0.0         | 0.0              |                   |
| Paraquat | 3   | DJ694 | 4.4  | ♂   | 3                | 39  | 19.1 | 32               | 40   | 13.1 | 16               | 40         | 17.2 | 32               | 0.0         | 0.0              |                   |
| Paraquat | 3   | DJ694 | 4.4  | ♂   | 4                | 41  | 37.7 | 84               | 45   | 21.5 | 38               | 42         | 29.3 | 42               | 0.0         | 0.0              |                   |
| Paraquat | 3   | DJ694 | 4.4  | ♂   | 5                | 40  | 19.3 | 32               | 40   | 15.1 | 16               | 40         | 16.5 | 23               | 0.0         | 0.0              |                   |
| Paraquat | 3   | DJ694 | 4.4  | ♂   | 6                | 40  | 57.9 | 110              | 41   | 20.0 | 34               | 39         | 24.2 | 34               | 0.0         | 0.0              |                   |
| Paraquat | 3   | DJ694 | 4.4  | ♂   | 7                | 40  | 43.0 | 110              | 41   | 22.5 | 34               | 41         | 26.7 | 58               | 0.0         | 0.0              |                   |
| Paraquat | 3   | D42   | 2.1  | ♀   | 1                | 40  | 29.5 | 51               | 40   | 23.3 | 35               | 40         | 24.5 | 45               | 0.0         | 0.0              |                   |
| Paraquat | 3   | D42   | 2.1  | ♀   | 2                | 40  | 29.4 | 47               | 40   | 28.1 | 52               | 40         | 27.3 | 42               | -3.1        | -10.6            | 0.2322            |
| Paraquat | 3   | D42   | 2.1  | ♀   | 3                | 40  | 18.9 | 30               | 40   | 16.6 | 20               | 40         | 15.8 | 20               | -5.3        | 0.0              | <b>0.0010</b>     |
| Paraquat | 3   | D42   | 2.1  | ♀   | 4                | 40  | 55.9 | 90               | 40   | 52.6 | 110              | 41         | 24.3 | 42               | -53.7       | -53.3            | <b>&lt;0.0001</b> |
| Paraquat | 3   | D42   | 2.1  | ♀   | 5                | 40  | 17.8 | 25               | 40   | 17.5 | 25               | 40         | 16.9 | 25               | -3.6        | 0.0              | 0.2549            |
| Paraquat | 3   | D42   | 2.1  | ♀   | 6                | 37  | 56.4 | 84               | 41   | 61.9 | 110              | 41         | 24.8 | 46               | -56.0       | -45.2            | <b>&lt;0.0001</b> |
| Paraquat | 3   | D42   | 2.1  | ♀   | 7                | 42  | 50.9 | 84               | 41   | 58.4 | 110              | 40         | 21.7 | 38               | -57.3       | -54.8            | <b>&lt;0.0001</b> |
| Paraquat | 3   | D42   | 2.1  | ♂   | 1                | 40  | 25.2 | 40               | 40   | 22.8 | 30               | 40         | 23.5 | 40               | 0.0         | 0.0              |                   |
| Paraquat | 3   | D42   | 2.1  | ♂   | 2                | 40  | 27.5 | 57               | 40   | 26.3 | 47               | 40         | 20.6 | 37               | -21.4       | -21.3            | <b>0.0004</b>     |
| Paraquat | 3   | D42   | 2.1  | ♂   | 3                | 40  | 17.9 | 25               | 40   | 16.3 | 20               | 40         | 14.6 | 20               | -10.0       | 0.0              | <b>0.0002</b>     |
| Paraquat | 3   | D42   | 2.1  | ♂   | 4                | 40  | 35.5 | 66               | 40   | 33.0 | 74               | 38         | 33.4 | 58               | 0.0         | -12.1            |                   |
| Paraquat | 3   | D42   | 2.1  | ♂   | 5                | 40  | 17.8 | 25               | 40   | 15.9 | 25               | 40         | 14.4 | 20               | -9.4        | -20.0            | <b>0.0003</b>     |

Table S2

| Stress   | Age | Gal4 | UAS  | Sex | Rep <sup>1</sup> | UAS |      |                  | Gal4 |      |                  | Gal4 + UAS |      |                  | % Extension |                  | P                 |
|----------|-----|------|------|-----|------------------|-----|------|------------------|------|------|------------------|------------|------|------------------|-------------|------------------|-------------------|
|          |     |      |      |     |                  | n   | Mean | Max <sup>2</sup> | n    | Mean | Max <sup>2</sup> | n          | Mean | Max <sup>2</sup> | Mean        | Max <sup>2</sup> |                   |
| Paraquat | 3   | D42  | 2.1  | ♂   | 6                | 34  | 40.2 | 84               | 40   | 28.7 | 58               | 40         | 44.7 | 74               | 11.1        | 0.0              | 0.4630            |
| Paraquat | 3   | D42  | 2.1  | ♂   | 7                | 41  | 39.0 | 84               | 40   | 38.6 | 84               | 31         | 45.6 | 84               | 17.0        | 0.0              | 0.1017            |
| Paraquat | 3   | D42  | 4.3  | ♀   | 1                | 40  | 30.8 | 43               | 40   | 43.8 | 69               | 40         | 33.2 | 69               | 0.0         | 0.0              |                   |
| Paraquat | 3   | D42  | 4.3  | ♀   | 2                | 42  | 49.1 | 84               | 40   | 52.6 | 110              | 40         | 35.3 | 66               | -28.3       | -21.4            | <b>0.0003</b>     |
| Paraquat | 3   | D42  | 4.3  | ♀   | 3                | 41  | 39.3 | 74               | 41   | 61.9 | 110              | 40         | 31.4 | 50               | -20.0       | -32.4            | <b>0.0098</b>     |
| Paraquat | 3   | D42  | 4.3  | ♀   | 4                | 40  | 43.2 | 74               | 41   | 58.4 | 110              | 40         | 27.8 | 58               | -35.8       | -21.6            | <b>0.0001</b>     |
| Paraquat | 3   | D42  | 4.3  | ♂   | 1                | 40  | 27.8 | 56               | 40   | 31.1 | 56               | 40         | 27.1 | 56               | -2.5        | 0.0              | 0.2014            |
| Paraquat | 3   | D42  | 4.3  | ♂   | 2                | 50  | 42.9 | 84               | 40   | 33.0 | 74               | 41         | 44.1 | 84               | 2.9         | 0.0              | <b>0.0011</b>     |
| Paraquat | 3   | D42  | 4.3  | ♂   | 3                | 41  | 41.6 | 110              | 40   | 28.7 | 58               | 39         | 44.1 | 90               | 6.0         | 0.0              | 0.5716            |
| Paraquat | 3   | D42  | 4.3  | ♂   | 4                | 41  | 46.7 | 84               | 40   | 38.6 | 84               | 41         | 39.4 | 74               | 0.0         | -11.9            |                   |
| Paraquat | 3   | D42  | 9.1  | ♀   | 1                | 39  | 21.2 | 32               | 40   | 24.2 | 41               | 42         | 27.1 | 48               | 12.1        | 17.1             | <b>0.0028</b>     |
| Paraquat | 3   | D42  | 9.1  | ♀   | 2                | 39  | 54.4 | 90               | 40   | 52.6 | 110              | 40         | 28.3 | 58               | -46.1       | -35.6            | <b>&lt;0.0001</b> |
| Paraquat | 3   | D42  | 9.1  | ♀   | 3                | 40  | 21.5 | 32               | 40   | 25.8 | 41               | 41         | 30.0 | 48               | 16.3        | 17.1             | <b>0.0495</b>     |
| Paraquat | 3   | D42  | 9.1  | ♀   | 4                | 39  | 55.1 | 84               | 41   | 61.9 | 110              | 40         | 30.4 | 58               | -44.9       | -31.0            | <b>&lt;0.0001</b> |
| Paraquat | 3   | D42  | 9.1  | ♀   | 5                | 46  | 49.4 | 90               | 41   | 58.4 | 110              | 42         | 25.4 | 42               | -48.5       | -53.3            | <b>&lt;0.0001</b> |
| Paraquat | 3   | D42  | 9.1  | ♂   | 1                | 40  | 14.7 | 23               | 40   | 16.3 | 23               | 40         | 14.9 | 23               | 0.0         | 0.0              |                   |
| Paraquat | 3   | D42  | 9.1  | ♂   | 2                | 42  | 31.0 | 66               | 40   | 33.0 | 74               | 43         | 37.6 | 74               | 14.0        | 0.0              | <b>0.0066</b>     |
| Paraquat | 3   | D42  | 9.1  | ♂   | 3                | 40  | 15.7 | 23               | 40   | 20.2 | 32               | 40         | 17.4 | 32               | 0.0         | 0.0              |                   |
| Paraquat | 3   | D42  | 9.1  | ♂   | 4                | 34  | 38.2 | 74               | 40   | 28.7 | 58               | 40         | 34.5 | 74               | 0.0         | 0.0              |                   |
| Paraquat | 3   | D42  | 9.1  | ♂   | 5                | 39  | 31.2 | 66               | 40   | 38.6 | 84               | 39         | 33.2 | 58               | 0.0         | -12.1            |                   |
| Paraquat | 3   | D42  | 3.2  | ♀   | 1                | 40  | 30.7 | 80               | 40   | 30.1 | 55               | 40         | 32.0 | 75               | 4.3         | 0.0              | 0.3500            |
| Paraquat | 3   | D42  | 3.2  | ♀   | 2                | 36  | 69.0 | 118              | 40   | 52.6 | 110              | 40         | 25.0 | 42               | -52.4       | -61.8            | <b>&lt;0.0001</b> |
| Paraquat | 3   | D42  | 3.2  | ♀   | 3                | 38  | 67.4 | 110              | 41   | 61.9 | 110              | 40         | 20.6 | 30               | -66.7       | -72.7            | <b>&lt;0.0001</b> |
| Paraquat | 3   | D42  | 3.2  | ♀   | 4                | 40  | 60.2 | 110              | 41   | 58.4 | 110              | 40         | 19.7 | 38               | -66.3       | -65.5            | <b>&lt;0.0001</b> |
| Paraquat | 3   | D42  | 3.2  | ♂   | 1                | 40  | 33.9 | 80               | 40   | 25.6 | 45               | 40         | 36.6 | 88               | 7.9         | 10.0             | <b>0.0031</b>     |
| Paraquat | 3   | D42  | 3.2  | ♂   | 2                | 39  | 54.8 | 90               | 40   | 33.0 | 74               | 42         | 45.4 | 110              | 0.0         | 22.2             |                   |
| Paraquat | 3   | D42  | 3.2  | ♂   | 3                | 40  | 62.8 | 110              | 40   | 28.7 | 58               | 39         | 36.3 | 74               | 0.0         | 0.0              |                   |
| Paraquat | 3   | D42  | 3.2  | ♂   | 4                | 37  | 64.3 | 110              | 40   | 38.6 | 84               | 41         | 49.9 | 110              | 0.0         | 0.0              |                   |
| Paraquat | 3   | D42  | 10.1 | ♀   | 1                | 40  | 41.6 | 117              | 40   | 53.0 | 117              | 40         | 45.2 | 105              | 0.0         | -10.3            |                   |
| Paraquat | 3   | D42  | 10.1 | ♀   | 2                | 40  | 23.7 | 41               | 40   | 24.2 | 41               | 39         | 31.3 | 59               | 29.7        | 43.9             | <b>0.0008</b>     |
| Paraquat | 3   | D42  | 10.1 | ♀   | 3                | 28  | 66.1 | 90               | 40   | 52.6 | 110              | 44         | 47.2 | 110              | -10.1       | 0.0              | 0.1142            |
| Paraquat | 3   | D42  | 10.1 | ♀   | 4                | 40  | 24.3 | 59               | 40   | 25.8 | 41               | 40         | 32.2 | 48               | 24.6        | 0.0              | <b>0.0014</b>     |
| Paraquat | 3   | D42  | 10.1 | ♀   | 5                | 39  | 88.3 | 118              | 41   | 61.9 | 110              | 40         | 28.9 | 66               | -53.3       | -40.0            | <b>&lt;0.0001</b> |
| Paraquat | 3   | D42  | 10.1 | ♀   | 6                | 37  | 78.3 | 110              | 41   | 58.4 | 110              | 40         | 31.1 | 84               | -46.9       | -23.6            | <b>&lt;0.0001</b> |
| Paraquat | 3   | D42  | 10.1 | ♂   | 1                | 40  | 63.7 | 117              | 40   | 54.4 | 105              | 40         | 58.7 | 117              | 0.0         | 0.0              |                   |
| Paraquat | 3   | D42  | 10.1 | ♂   | 2                | 40  | 23.3 | 41               | 40   | 16.3 | 23               | 41         | 25.9 | 59               | 10.8        | 43.9             | 0.2396            |
| Paraquat | 3   | D42  | 10.1 | ♂   | 3                | 39  | 47.5 | 90               | 40   | 33.0 | 74               | 46         | 49.8 | 110              | 4.7         | 22.2             | <b>0.0005</b>     |
| Paraquat | 3   | D42  | 10.1 | ♂   | 4                | 40  | 28.3 | 41               | 40   | 20.2 | 32               | 40         | 24.6 | 41               | 0.0         | 0.0              |                   |
| Paraquat | 3   | D42  | 10.1 | ♂   | 5                | 39  | 73.1 | 130              | 40   | 28.7 | 58               | 41         | 46.9 | 110              | 0.0         | 0.0              |                   |
| Paraquat | 3   | D42  | 10.1 | ♂   | 6                | 42  | 59.0 | 110              | 40   | 38.6 | 84               | 39         | 35.5 | 90               | -7.9        | 0.0              | <b>0.0001</b>     |
| Paraquat | 3   | D42  | 3.1  | ♀   | 1                | 40  | 31.4 | 45               | 40   | 23.3 | 35               | 40         | 29.6 | 51               | 0.0         | 13.3             |                   |
| Paraquat | 3   | D42  | 3.1  | ♀   | 2                | 40  | 33.4 | 64               | 38   | 37.2 | 76               | 40         | 30.6 | 64               | -8.4        | 0.0              | 0.0687            |
| Paraquat | 3   | D42  | 3.1  | ♀   | 3                | 40  | 16.0 | 25               | 40   | 16.6 | 20               | 40         | 15.6 | 25               | -2.3        | 0.0              | 0.2561            |
| Paraquat | 3   | D42  | 3.1  | ♀   | 4                | 40  | 46.1 | 74               | 40   | 52.6 | 110              | 50         | 40.9 | 74               | -11.3       | 0.0              | 0.0505            |
| Paraquat | 3   | D42  | 3.1  | ♀   | 5                | 40  | 18.0 | 30               | 40   | 17.5 | 25               | 40         | 18.9 | 30               | 4.9         | 0.0              | 0.1826            |
| Paraquat | 3   | D42  | 3.1  | ♀   | 6                | 36  | 50.6 | 84               | 41   | 61.9 | 110              | 40         | 30.7 | 58               | -39.3       | -31.0            | <b>&lt;0.0001</b> |
| Paraquat | 3   | D42  | 3.1  | ♀   | 7                | 44  | 49.4 | 74               | 41   | 58.4 | 110              | 39         | 26.9 | 50               | -45.5       | -32.4            | <b>&lt;0.0001</b> |
| Paraquat | 3   | D42  | 3.1  | ♂   | 1                | 40  | 30.5 | 57               | 40   | 22.8 | 30               | 40         | 39.7 | 69               | 30.1        | 21.1             | <b>0.0080</b>     |
| Paraquat | 3   | D42  | 3.1  | ♂   | 2                | 40  | 23.3 | 39               | 38   | 35.0 | 70               | 40         | 44.6 | 82               | 27.3        | 17.1             | <b>0.0195</b>     |

Table S2

| Stress   | Age | Gal4   | UAS | Sex | Rep <sup>1</sup> | UAS |      |                  | Gal4 |      |                  | Gal4 + UAS |      |                  | % Extension |                  | P             |
|----------|-----|--------|-----|-----|------------------|-----|------|------------------|------|------|------------------|------------|------|------------------|-------------|------------------|---------------|
|          |     |        |     |     |                  | n   | Mean | Max <sup>2</sup> | n    | Mean | Max <sup>2</sup> | n          | Mean | Max <sup>2</sup> | Mean        | Max <sup>2</sup> |               |
| Paraquat | 3   | D42    | 3.1 | ♂   | 3                | 40  | 18.8 | 40               | 40   | 16.3 | 20               | 40         | 24.5 | 49               | 30.4        | 22.5             | <b>0.0013</b> |
| Paraquat | 3   | D42    | 3.1 | ♂   | 4                | 45  | 41.4 | 90               | 40   | 33.0 | 74               | 40         | 51.3 | 110              | 23.7        | 22.2             | <b>0.0004</b> |
| Paraquat | 3   | D42    | 3.1 | ♂   | 5                | 40  | 19.3 | 25               | 40   | 15.9 | 25               | 40         | 24.5 | 40               | 27.1        | 60.0             | <b>0.0010</b> |
| Paraquat | 3   | D42    | 3.1 | ♂   | 6                | 39  | 41.6 | 84               | 40   | 28.7 | 58               | 37         | 55.5 | 110              | 33.2        | 31.0             | <b>0.0106</b> |
| Paraquat | 3   | D42    | 3.1 | ♂   | 7                | 41  | 44.3 | 84               | 40   | 38.6 | 84               | 44         | 52.6 | 110              | 18.6        | 31.0             | <b>0.0059</b> |
| Paraquat | 3   | D42    | 4.4 | ♀   | 1                | 40  | 35.5 | 58               | 40   | 37.7 | 58               | 40         | 49.5 | 72               | 31.4        | 24.1             | <b>0.0001</b> |
| Paraquat | 3   | D42    | 4.4 | ♀   | 2                | 40  | 45.4 | 69               | 40   | 43.8 | 69               | 40         | 46.1 | 69               | 1.4         | 0.0              | 0.6113        |
| Paraquat | 3   | D42    | 4.4 | ♀   | 3                | 40  | 26.5 | 41               | 40   | 24.2 | 41               | 46         | 27.6 | 41               | 4.4         | 0.0              | 0.1040        |
| Paraquat | 3   | D42    | 4.4 | ♀   | 4                | 36  | 53.7 | 90               | 40   | 52.6 | 110              | 42         | 44.8 | 84               | -14.8       | -6.7             | <b>0.0320</b> |
| Paraquat | 3   | D42    | 4.4 | ♀   | 5                | 40  | 28.2 | 48               | 40   | 25.8 | 41               | 47         | 27.2 | 41               | 0.0         | 0.0              |               |
| Paraquat | 3   | D42    | 4.4 | ♀   | 6                | 40  | 67.1 | 110              | 41   | 61.9 | 110              | 41         | 46.8 | 74               | -24.4       | -32.7            | <b>0.0005</b> |
| Paraquat | 3   | D42    | 4.4 | ♀   | 7                | 41  | 57.2 | 90               | 41   | 58.4 | 110              | 40         | 46.1 | 84               | -19.5       | -6.7             | <b>0.0075</b> |
| Paraquat | 3   | D42    | 4.4 | ♂   | 1                | 40  | 38.7 | 67               | 40   | 33.3 | 58               | 40         | 49.2 | 87               | 27.1        | 29.9             | <b>0.0038</b> |
| Paraquat | 3   | D42    | 4.4 | ♂   | 2                | 40  | 39.2 | 81               | 40   | 31.1 | 56               | 40         | 36.3 | 69               | 0.0         | 0.0              |               |
| Paraquat | 3   | D42    | 4.4 | ♂   | 3                | 39  | 19.1 | 32               | 40   | 16.3 | 23               | 42         | 18.5 | 32               | 0.0         | 0.0              |               |
| Paraquat | 3   | D42    | 4.4 | ♂   | 4                | 41  | 37.7 | 84               | 40   | 33.0 | 74               | 39         | 33.0 | 74               | 0.0         | 0.0              |               |
| Paraquat | 3   | D42    | 4.4 | ♂   | 5                | 40  | 19.3 | 32               | 40   | 20.2 | 32               | 41         | 19.5 | 32               | 0.0         | 0.0              |               |
| Paraquat | 3   | D42    | 4.4 | ♂   | 6                | 40  | 57.9 | 110              | 40   | 28.7 | 58               | 40         | 37.8 | 74               | 0.0         | 0.0              |               |
| Paraquat | 3   | D42    | 4.4 | ♂   | 7                | 40  | 43.0 | 110              | 40   | 38.6 | 84               | 38         | 33.4 | 58               | -13.4       | -31.0            | <b>0.0268</b> |
| Paraquat | 10  | daGal4 | 2.1 | ♀   | 1                | 40  | 25.3 | 52               | 36   | 15.8 | 32               | 40         | 14.3 | 22               | -9.5        | -31.3            | 0.3221        |
| Paraquat | 10  | daGal4 | 2.1 | ♀   | 2                | 40  | 17.9 | 26               | 40   | 14.7 | 22               | 42         | 13.1 | 26               | -10.6       | 0.0              | 0.1758        |
| Paraquat | 10  | daGal4 | 2.1 | ♀   | 3                | 36  | 18.6 | 26               | 40   | 19.1 | 30               | 41         | 17.4 | 30               | -6.1        | 0.0              | 0.2041        |
| Paraquat | 10  | daGal4 | 2.1 | ♀   | 4                | 41  | 19.3 | 22               | 45   | 17.3 | 26               | 44         | 15.8 | 22               | -8.5        | 0.0              | <b>0.0001</b> |
| Paraquat | 10  | daGal4 | 2.1 | ♂   | 1                | 40  | 24.5 | 47               | 38   | 20.2 | 42               | 40         | 21.8 | 47               | 0.0         | 0.0              |               |
| Paraquat | 10  | daGal4 | 2.1 | ♂   | 2                | 41  | 17.6 | 26               | 40   | 17.5 | 30               | 42         | 13.7 | 22               | -21.5       | -15.4            | <b>0.0009</b> |
| Paraquat | 10  | daGal4 | 2.1 | ♂   | 3                | 40  | 15.4 | 22               | 45   | 13.3 | 18               | 42         | 13.4 | 22               | 0.0         | 0.0              |               |
| Paraquat | 10  | daGal4 | 2.1 | ♂   | 4                | 40  | 15.9 | 30               | 45   | 14.4 | 18               | 43         | 16.2 | 42               | 1.8         | 40.0             | 0.4360        |
| Paraquat | 10  | daGal4 | 4.3 | ♀   | 1                | 40  | 20.8 | 31               | 35   | 15.4 | 22               | 40         | 17.4 | 31               | 0.0         | 0.0              |               |
| Paraquat | 10  | daGal4 | 4.3 | ♀   | 2                | 40  | 18.2 | 33               | 40   | 13.2 | 25               | 40         | 16.0 | 25               | 0.0         | 0.0              |               |
| Paraquat | 10  | daGal4 | 4.3 | ♀   | 3                | 40  | 18.5 | 26               | 40   | 14.7 | 22               | 40         | 14.1 | 30               | -4.1        | 15.4             | <b>0.0015</b> |
| Paraquat | 10  | daGal4 | 4.3 | ♀   | 4                | 40  | 15.8 | 25               | 40   | 13.9 | 25               | 40         | 16.1 | 25               | 2.2         | 0.0              | <b>0.0225</b> |
| Paraquat | 10  | daGal4 | 4.3 | ♀   | 5                | 42  | 24.3 | 42               | 40   | 19.1 | 30               | 40         | 18.9 | 35               | -1.3        | 0.0              | <b>0.0010</b> |
| Paraquat | 10  | daGal4 | 4.3 | ♀   | 6                | 42  | 19.5 | 26               | 45   | 17.3 | 26               | 41         | 19.1 | 26               | 0.0         | 0.0              |               |
| Paraquat | 10  | daGal4 | 4.3 | ♂   | 1                | 40  | 20.5 | 31               | 40   | 18.2 | 31               | 40         | 23.6 | 43               | 15.1        | 38.7             | <b>0.0010</b> |
| Paraquat | 10  | daGal4 | 4.3 | ♂   | 2                | 40  | 13.4 | 20               | 40   | 12.7 | 16               | 40         | 14.8 | 25               | 10.1        | 25.0             | <b>0.0115</b> |
| Paraquat | 10  | daGal4 | 4.3 | ♂   | 3                | 58  | 18.7 | 26               | 40   | 17.5 | 30               | 44         | 13.6 | 22               | -22.0       | -15.4            | <b>0.0015</b> |
| Paraquat | 10  | daGal4 | 4.3 | ♂   | 4                | 40  | 14.0 | 20               | 40   | 13.7 | 25               | 40         | 13.4 | 20               | -1.6        | 0.0              | 0.5721        |
| Paraquat | 10  | daGal4 | 4.3 | ♂   | 5                | 42  | 16.0 | 35               | 45   | 13.3 | 18               | 14         | 15.7 | 18               | 0.0         | 0.0              |               |
| Paraquat | 10  | daGal4 | 4.3 | ♂   | 6                | 40  | 13.6 | 22               | 45   | 14.4 | 18               | 48         | 16.6 | 30               | 16.0        | 36.4             | <b>0.0136</b> |
| Paraquat | 10  | daGal4 | 9.1 | ♀   | 1                | 40  | 19.0 | 27               | 39   | 14.3 | 21               | 40         | 16.5 | 40               | 0.0         | 48.1             |               |
| Paraquat | 10  | daGal4 | 9.1 | ♀   | 2                | 41  | 18.7 | 30               | 40   | 14.7 | 22               | 41         | 15.6 | 26               | 0.0         | 0.0              |               |
| Paraquat | 10  | daGal4 | 9.1 | ♀   | 3                | 41  | 18.2 | 27               | 40   | 14.9 | 21               | 30         | 12.5 | 21               | -15.7       | 0.0              | <b>0.0072</b> |
| Paraquat | 10  | daGal4 | 9.1 | ♀   | 4                | 42  | 22.8 | 35               | 40   | 19.1 | 30               | 41         | 18.6 | 38               | -2.7        | 8.6              | <b>0.0050</b> |
| Paraquat | 10  | daGal4 | 9.1 | ♀   | 5                | 42  | 21.0 | 30               | 45   | 17.3 | 26               | 41         | 16.0 | 18               | -7.7        | -30.8            | 0.1465        |
| Paraquat | 10  | daGal4 | 9.1 | ♂   | 1                | 40  | 15.6 | 21               | 41   | 11.7 | 15               | 40         | 10.5 | 15               | -10.3       | 0.0              | <b>0.0094</b> |
| Paraquat | 10  | daGal4 | 9.1 | ♂   | 2                | 38  | 16.3 | 30               | 40   | 17.5 | 30               | 42         | 13.7 | 22               | -16.1       | -26.7            | <b>0.0017</b> |
| Paraquat | 10  | daGal4 | 9.1 | ♂   | 3                | 40  | 17.7 | 27               | 39   | 13.4 | 21               | 40         | 10.9 | 15               | -18.7       | -28.6            | <b>0.0017</b> |
| Paraquat | 10  | daGal4 | 9.1 | ♂   | 4                | 40  | 14.1 | 22               | 45   | 13.3 | 18               | 40         | 12.5 | 14               | -6.1        | -22.2            | <b>0.0059</b> |
| Paraquat | 10  | daGal4 | 9.1 | ♂   | 5                | 43  | 13.1 | 22               | 45   | 14.4 | 18               | 44         | 11.5 | 18               | -12.4       | 0.0              | <b>0.0096</b> |

Table S2

| Stress   | Age | Gal4   | UAS  | Sex | Rep <sup>1</sup> | UAS |      |                  | Gal4 |      |                  | Gal4 + UAS |      |                  | % Extension |                  | P                 |
|----------|-----|--------|------|-----|------------------|-----|------|------------------|------|------|------------------|------------|------|------------------|-------------|------------------|-------------------|
|          |     |        |      |     |                  | n   | Mean | Max <sup>2</sup> | n    | Mean | Max <sup>2</sup> | n          | Mean | Max <sup>2</sup> | Mean        | Max <sup>2</sup> |                   |
| Paraquat | 10  | daGal4 | 3.2  | ♀   | 1                | 38  | 19.1 | 40               | 40   | 15.3 | 26               | 40         | 15.1 | 26               | -1.0        | 0.0              | <b>0.0198</b>     |
| Paraquat | 10  | daGal4 | 3.2  | ♀   | 2                | 40  | 19.2 | 33               | 40   | 13.2 | 25               | 40         | 16.6 | 25               | 0.0         | 0.0              |                   |
| Paraquat | 10  | daGal4 | 3.2  | ♀   | 3                | 35  | 17.1 | 30               | 40   | 14.7 | 22               | 40         | 20.5 | 35               | 19.7        | 16.7             | <b>0.0387</b>     |
| Paraquat | 10  | daGal4 | 3.2  | ♀   | 4                | 40  | 17.3 | 25               | 40   | 13.9 | 25               | 40         | 17.8 | 33               | 3.0         | 32.0             | <b>0.0011</b>     |
| Paraquat | 10  | daGal4 | 3.2  | ♀   | 5                | 40  | 22.2 | 42               | 40   | 19.1 | 30               | 43         | 24.5 | 35               | 10.4        | 0.0              | <b>0.0002</b>     |
| Paraquat | 10  | daGal4 | 3.2  | ♀   | 6                | 39  | 19.9 | 35               | 45   | 17.3 | 26               | 33         | 23.1 | 42               | 16.2        | 20.0             | <b>0.0020</b>     |
| Paraquat | 10  | daGal4 | 3.2  | ♂   | 1                | 38  | 24.3 | 45               | 40   | 19.9 | 45               | 40         | 44.7 | 75               | 83.4        | 66.7             | <b>&lt;0.0001</b> |
| Paraquat | 10  | daGal4 | 3.2  | ♂   | 2                | 40  | 18.3 | 25               | 40   | 12.7 | 16               | 40         | 17.5 | 48               | 0.0         | 92.0             |                   |
| Paraquat | 10  | daGal4 | 3.2  | ♂   | 3                | 38  | 25.0 | 42               | 40   | 17.5 | 30               | 37         | 25.1 | 61               | 0.4         | 45.2             | <b>0.0014</b>     |
| Paraquat | 10  | daGal4 | 3.2  | ♂   | 4                | 40  | 18.4 | 33               | 40   | 13.7 | 25               | 40         | 18.2 | 33               | 0.0         | 0.0              |                   |
| Paraquat | 10  | daGal4 | 3.2  | ♂   | 5                | 38  | 24.3 | 61               | 45   | 13.3 | 18               | 37         | 33.8 | 70               | 38.9        | 14.8             | <b>0.0082</b>     |
| Paraquat | 10  | daGal4 | 3.2  | ♂   | 6                | 39  | 29.8 | 61               | 45   | 14.4 | 18               | 37         | 34.4 | 70               | 15.4        | 14.8             | 0.1981            |
| Paraquat | 10  | daGal4 | 10.1 | ♀   | 1                | 29  | 17.3 | 22               | 31   | 17.2 | 17               | 40         | 18.2 | 28               | 4.8         | 27.3             | 0.2535            |
| Paraquat | 10  | daGal4 | 10.1 | ♀   | 2                | 40  | 18.9 | 27               | 39   | 14.3 | 21               | 40         | 14.2 | 27               | -1.3        | 0.0              | 0.7502            |
| Paraquat | 10  | daGal4 | 10.1 | ♀   | 3                | 36  | 22.9 | 38               | 40   | 14.7 | 22               | 38         | 25.3 | 61               | 10.1        | 60.5             | 0.4944            |
| Paraquat | 10  | daGal4 | 10.1 | ♀   | 4                | 40  | 18.8 | 27               | 40   | 14.9 | 21               | 36         | 17.2 | 27               | 0.0         | 0.0              |                   |
| Paraquat | 10  | daGal4 | 10.1 | ♀   | 5                | 36  | 27.9 | 61               | 40   | 19.1 | 30               | 40         | 23.4 | 42               | 0.0         | 0.0              |                   |
| Paraquat | 10  | daGal4 | 10.1 | ♀   | 6                | 37  | 24.2 | 38               | 45   | 17.3 | 26               | 43         | 23.9 | 61               | 0.0         | 60.5             |                   |
| Paraquat | 10  | daGal4 | 10.1 | ♂   | 1                | 37  | 18.8 | 28               | 31   | 20.1 | 42               | 38         | 39.7 | 89               | 97.0        | 111.9            | <b>&lt;0.0001</b> |
| Paraquat | 10  | daGal4 | 10.1 | ♂   | 2                | 40  | 25.9 | 40               | 41   | 11.7 | 15               | 40         | 14.8 | 21               | 0.0         | 0.0              |                   |
| Paraquat | 10  | daGal4 | 10.1 | ♂   | 3                | 38  | 25.9 | 61               | 40   | 17.5 | 30               | 40         | 27.2 | 70               | 5.1         | 14.8             | 0.8843            |
| Paraquat | 10  | daGal4 | 10.1 | ♂   | 4                | 40  | 20.6 | 40               | 39   | 13.4 | 21               | 39         | 19.7 | 40               | 0.0         | 0.0              |                   |
| Paraquat | 10  | daGal4 | 10.1 | ♂   | 5                | 37  | 25.4 | 42               | 45   | 13.3 | 18               | 41         | 28.5 | 70               | 12.3        | 66.7             | 0.6356            |
| Paraquat | 10  | daGal4 | 10.1 | ♂   | 6                | 39  | 24.7 | 42               | 45   | 14.4 | 18               | 40         | 20.4 | 38               | 0.0         | 0.0              |                   |
| Paraquat | 10  | daGal4 | 3.1  | ♀   | 1                | 40  | 12.5 | 22               | 40   | 12.7 | 22               | 40         | 14.1 | 30               | 10.8        | 36.4             | 0.2253            |
| Paraquat | 10  | daGal4 | 3.1  | ♀   | 2                | 43  | 14.0 | 22               | 40   | 14.7 | 22               | 39         | 16.1 | 22               | 9.2         | 0.0              | <b>0.0228</b>     |
| Paraquat | 10  | daGal4 | 3.1  | ♀   | 3                | 40  | 17.9 | 30               | 40   | 19.1 | 30               | 44         | 17.7 | 30               | -1.0        | 0.0              | 0.2319            |
| Paraquat | 10  | daGal4 | 3.1  | ♀   | 4                | 44  | 18.2 | 35               | 45   | 17.3 | 26               | 42         | 17.5 | 38               | 0.0         | 8.6              |                   |
| Paraquat | 10  | daGal4 | 3.1  | ♂   | 1                | 33  | 23.5 | 34               | 39   | 23.6 | 61               | 40         | 52.9 | 93               | 123.9       | 52.5             | <b>&lt;0.0001</b> |
| Paraquat | 10  | daGal4 | 3.1  | ♂   | 2                | 41  | 19.1 | 35               | 40   | 17.5 | 30               | 39         | 14.6 | 22               | -16.5       | -26.7            | <b>0.0019</b>     |
| Paraquat | 10  | daGal4 | 3.1  | ♂   | 3                | 42  | 16.6 | 30               | 45   | 13.3 | 18               | 40         | 17.3 | 30               | 4.5         | 0.0              | 0.5164            |
| Paraquat | 10  | daGal4 | 3.1  | ♂   | 4                | 42  | 15.1 | 26               | 45   | 14.4 | 18               | 43         | 15.2 | 22               | 0.4         | 0.0              | 0.2269            |
| Paraquat | 10  | daGal4 | 4.4  | ♀   | 1                | 40  | 26.2 | 43               | 35   | 15.4 | 22               | 40         | 17.2 | 31               | 0.0         | 0.0              |                   |
| Paraquat | 10  | daGal4 | 4.4  | ♀   | 2                | 40  | 19.8 | 27               | 39   | 14.3 | 21               | 69         | 16.0 | 27               | 0.0         | 0.0              |                   |
| Paraquat | 10  | daGal4 | 4.4  | ♀   | 3                | 40  | 17.0 | 26               | 40   | 14.7 | 22               | 39         | 13.2 | 26               | -10.3       | 0.0              | <b>0.0009</b>     |
| Paraquat | 10  | daGal4 | 4.4  | ♀   | 4                | 40  | 19.8 | 40               | 40   | 14.9 | 21               | 40         | 16.5 | 40               | 0.0         | 0.0              |                   |
| Paraquat | 10  | daGal4 | 4.4  | ♀   | 5                | 41  | 23.9 | 30               | 40   | 19.1 | 30               | 43         | 17.7 | 30               | -7.2        | 0.0              | 0.2879            |
| Paraquat | 10  | daGal4 | 4.4  | ♀   | 6                | 34  | 20.5 | 35               | 45   | 17.3 | 26               | 42         | 15.3 | 22               | -11.3       | -15.4            | <b>0.0005</b>     |
| Paraquat | 10  | daGal4 | 4.4  | ♂   | 1                | 39  | 29.7 | 43               | 40   | 18.2 | 31               | 40         | 30.8 | 56               | 3.5         | 30.2             | 0.6732            |
| Paraquat | 10  | daGal4 | 4.4  | ♂   | 2                | 40  | 24.8 | 40               | 41   | 11.7 | 15               | 56         | 17.0 | 40               | 0.0         | 0.0              |                   |
| Paraquat | 10  | daGal4 | 4.4  | ♂   | 3                | 41  | 17.9 | 26               | 40   | 17.5 | 30               | 41         | 28.7 | 70               | 60.0        | 133.3            | <b>&lt;0.0001</b> |
| Paraquat | 10  | daGal4 | 4.4  | ♂   | 4                | 40  | 18.4 | 27               | 39   | 13.4 | 21               | 40         | 14.7 | 21               | 0.0         | 0.0              |                   |
| Paraquat | 10  | daGal4 | 4.4  | ♂   | 5                | 40  | 17.0 | 26               | 45   | 13.3 | 18               | 40         | 22.9 | 42               | 34.4        | 61.5             | <b>0.0005</b>     |
| Paraquat | 10  | daGal4 | 4.4  | ♂   | 6                | 39  | 15.2 | 22               | 45   | 14.4 | 18               | 41         | 15.9 | 35               | 4.1         | 59.1             | 0.7465            |
| Paraquat | 10  | DJ694  | 2.1  | ♀   | 1                | 40  | 25.3 | 52               | 40   | 17.0 | 27               | 40         | 14.6 | 22               | -14.0       | -18.5            | <b>0.0141</b>     |
| Paraquat | 10  | DJ694  | 2.1  | ♀   | 2                | 40  | 17.9 | 26               | 39   | 20.9 | 38               | 43         | 17.8 | 26               | -0.5        | 0.0              | <b>0.0195</b>     |
| Paraquat | 10  | DJ694  | 2.1  | ♀   | 3                | 40  | 12.1 | 16               | 40   | 13.0 | 16               | 40         | 12.0 | 16               | -0.8        | 0.0              | <b>0.0411</b>     |
| Paraquat | 10  | DJ694  | 2.1  | ♀   | 4                | 36  | 18.6 | 26               | 34   | 16.9 | 35               | 32         | 13.3 | 22               | -21.7       | -15.4            | <b>0.0119</b>     |
| Paraquat | 10  | DJ694  | 2.1  | ♀   | 5                | 40  | 14.2 | 20               | 40   | 13.6 | 24               | 40         | 10.8 | 12               | -20.6       | -40.0            | <b>&lt;0.0001</b> |

Table S2

| Stress   | Age | Gal4  | UAS | Sex | Rep <sup>1</sup> | UAS |      |                  | Gal4 |      |                  | Gal4 + UAS |      |                  | % Extension |                  | P                 |
|----------|-----|-------|-----|-----|------------------|-----|------|------------------|------|------|------------------|------------|------|------------------|-------------|------------------|-------------------|
|          |     |       |     |     |                  | n   | Mean | Max <sup>2</sup> | n    | Mean | Max <sup>2</sup> | n          | Mean | Max <sup>2</sup> | Mean        | Max <sup>2</sup> |                   |
| Paraquat | 10  | DJ694 | 2.1 | ♀   | 6                | 41  | 19.3 | 22               | 38   | 16.1 | 26               | 40         | 12.8 | 18               | -20.5       | -18.2            | <b>0.0002</b>     |
| Paraquat | 10  | DJ694 | 2.1 | ♀   | 7                | 40  | 13.2 | 20               | 40   | 11.4 | 16               | 40         | 10.9 | 12               | -4.4        | -25.0            | 0.3596            |
| Paraquat | 10  | DJ694 | 2.1 | ♂   | 1                | 40  | 24.5 | 47               | 40   | 29.6 | 57               | 40         | 21.5 | 42               | -12.2       | -10.6            | <b>0.0006</b>     |
| Paraquat | 10  | DJ694 | 2.1 | ♂   | 2                | 41  | 17.6 | 26               | 44   | 14.4 | 18               | 40         | 12.9 | 18               | -10.2       | 0.0              | <b>0.0131</b>     |
| Paraquat | 10  | DJ694 | 2.1 | ♂   | 3                | 40  | 9.5  | 12               | 40   | 10.6 | 16               | 40         | 10.8 | 12               | 1.9         | 0.0              | <b>0.0038</b>     |
| Paraquat | 10  | DJ694 | 2.1 | ♂   | 4                | 40  | 15.4 | 22               | 38   | 12.4 | 18               | 27         | 10.9 | 14               | -12.5       | -22.2            | 0.0792            |
| Paraquat | 10  | DJ694 | 2.1 | ♂   | 5                | 40  | 10.5 | 12               | 40   | 12.4 | 16               | 40         | 10.5 | 12               | 0.0         | 0.0              |                   |
| Paraquat | 10  | DJ694 | 2.1 | ♂   | 6                | 40  | 15.9 | 30               | 42   | 13.3 | 18               | 40         | 13.3 | 18               | 0.0         | 0.0              |                   |
| Paraquat | 10  | DJ694 | 2.1 | ♂   | 7                | 40  | 10.2 | 12               | 40   | 9.5  | 12               | 40         | 10.1 | 12               | 0.0         | 0.0              |                   |
| Paraquat | 10  | DJ694 | 4.3 | ♀   | 1                | 40  | 20.8 | 31               | 40   | 16.8 | 31               | 40         | 15.9 | 31               | -5.2        | 0.0              | <b>0.0018</b>     |
| Paraquat | 10  | DJ694 | 4.3 | ♀   | 2                | 40  | 18.2 | 33               | 40   | 12.4 | 16               | 40         | 13.8 | 16               | 0.0         | 0.0              |                   |
| Paraquat | 10  | DJ694 | 4.3 | ♀   | 3                | 40  | 18.5 | 26               | 39   | 20.9 | 38               | 41         | 17.1 | 30               | -7.4        | 0.0              | <b>0.0024</b>     |
| Paraquat | 10  | DJ694 | 4.3 | ♀   | 4                | 40  | 12.2 | 16               | 40   | 13.0 | 16               | 40         | 10.3 | 12               | -16.0       | -25.0            | <b>&lt;0.0001</b> |
| Paraquat | 10  | DJ694 | 4.3 | ♀   | 5                | 40  | 15.8 | 25               | 40   | 13.2 | 16               | 40         | 15.2 | 20               | 0.0         | 0.0              |                   |
| Paraquat | 10  | DJ694 | 4.3 | ♀   | 6                | 42  | 24.3 | 42               | 34   | 16.9 | 35               | 28         | 13.9 | 26               | -18.1       | -25.7            | <b>0.0368</b>     |
| Paraquat | 10  | DJ694 | 4.3 | ♀   | 7                | 40  | 12.8 | 16               | 40   | 13.6 | 24               | 30         | 11.3 | 12               | -11.5       | -25.0            | <b>0.0011</b>     |
| Paraquat | 10  | DJ694 | 4.3 | ♀   | 8                | 42  | 19.5 | 26               | 38   | 16.1 | 26               | 40         | 13.8 | 18               | -14.2       | -30.8            | <b>0.0158</b>     |
| Paraquat | 10  | DJ694 | 4.3 | ♀   | 9                | 40  | 13.5 | 20               | 40   | 11.4 | 16               | 40         | 10.9 | 12               | -4.4        | -25.0            | 0.3375            |
| Paraquat | 10  | DJ694 | 4.3 | ♂   | 1                | 40  | 20.5 | 31               | 40   | 19.5 | 43               | 41         | 24.9 | 43               | 21.3        | 0.0              | <b>0.0103</b>     |
| Paraquat | 10  | DJ694 | 4.3 | ♂   | 2                | 40  | 13.4 | 20               | 40   | 15.1 | 20               | 40         | 13.9 | 20               | 0.0         | 0.0              |                   |
| Paraquat | 10  | DJ694 | 4.3 | ♂   | 3                | 58  | 18.7 | 26               | 44   | 14.4 | 18               | 42         | 13.9 | 18               | -3.2        | 0.0              | 0.5680            |
| Paraquat | 10  | DJ694 | 4.3 | ♂   | 4                | 40  | 11.4 | 16               | 40   | 10.6 | 16               | 50         | 11.0 | 16               | 0.0         | 0.0              |                   |
| Paraquat | 10  | DJ694 | 4.3 | ♂   | 5                | 40  | 14.0 | 20               | 40   | 14.2 | 20               | 40         | 12.9 | 20               | -8.1        | 0.0              | 0.2208            |
| Paraquat | 10  | DJ694 | 4.3 | ♂   | 6                | 42  | 16.0 | 35               | 38   | 12.4 | 18               | 33         | 15.3 | 38               | 0.0         | 8.6              |                   |
| Paraquat | 10  | DJ694 | 4.3 | ♂   | 7                | 40  | 11.1 | 12               | 40   | 12.4 | 16               | 40         | 10.7 | 12               | -3.6        | 0.0              | <b>0.0021</b>     |
| Paraquat | 10  | DJ694 | 4.3 | ♂   | 8                | 40  | 13.6 | 22               | 42   | 13.3 | 18               | 36         | 15.8 | 26               | 16.0        | 18.2             | <b>0.0066</b>     |
| Paraquat | 10  | DJ694 | 4.3 | ♂   | 9                | 40  | 11.3 | 16               | 40   | 9.5  | 12               | 40         | 11.0 | 12               | 0.0         | 0.0              |                   |
| Paraquat | 10  | DJ694 | 9.1 | ♀   | 1                | 40  | 19.0 | 27               | 39   | 15.9 | 21               | 40         | 15.4 | 27               | -3.4        | 0.0              | <b>0.0008</b>     |
| Paraquat | 10  | DJ694 | 9.1 | ♀   | 2                | 41  | 18.7 | 30               | 39   | 20.9 | 38               | 40         | 14.8 | 22               | -20.8       | -26.7            | <b>0.0015</b>     |
| Paraquat | 10  | DJ694 | 9.1 | ♀   | 3                | 40  | 13.0 | 20               | 40   | 13.0 | 16               | 40         | 11.5 | 12               | -11.5       | -25.0            | <b>0.0009</b>     |
| Paraquat | 10  | DJ694 | 9.1 | ♀   | 4                | 41  | 18.2 | 27               | 40   | 14.4 | 21               | 38         | 18.1 | 27               | 0.0         | 0.0              |                   |
| Paraquat | 10  | DJ694 | 9.1 | ♀   | 5                | 42  | 22.8 | 35               | 34   | 16.9 | 35               | 37         | 12.1 | 18               | -28.7       | -48.6            | <b>0.0003</b>     |
| Paraquat | 10  | DJ694 | 9.1 | ♀   | 6                | 40  | 15.1 | 20               | 40   | 13.6 | 24               | 40         | 10.8 | 12               | -20.6       | -40.0            | <b>&lt;0.0001</b> |
| Paraquat | 10  | DJ694 | 9.1 | ♀   | 7                | 42  | 21.0 | 30               | 38   | 16.1 | 26               | 39         | 11.2 | 14               | -30.3       | -46.2            | <b>&lt;0.0001</b> |
| Paraquat | 10  | DJ694 | 9.1 | ♀   | 8                | 40  | 11.7 | 16               | 40   | 11.4 | 16               | 40         | 10.8 | 12               | -5.3        | -25.0            | 0.0642            |
| Paraquat | 10  | DJ694 | 9.1 | ♂   | 1                | 40  | 15.6 | 21               | 40   | 15.0 | 21               | 39         | 13.2 | 15               | -12.0       | -28.6            | <b>0.0011</b>     |
| Paraquat | 10  | DJ694 | 9.1 | ♂   | 2                | 38  | 16.3 | 30               | 44   | 14.4 | 18               | 40         | 14.3 | 26               | -0.4        | 0.0              | 0.0911            |
| Paraquat | 10  | DJ694 | 9.1 | ♂   | 3                | 40  | 11.0 | 16               | 40   | 10.6 | 16               | 40         | 9.4  | 12               | -11.3       | -25.0            | <b>0.0011</b>     |
| Paraquat | 10  | DJ694 | 9.1 | ♂   | 4                | 40  | 17.7 | 27               | 39   | 14.7 | 21               | 40         | 11.8 | 15               | -20.2       | -28.6            | <b>&lt;0.0001</b> |
| Paraquat | 10  | DJ694 | 9.1 | ♂   | 5                | 40  | 14.1 | 22               | 38   | 12.4 | 18               | 37         | 12.8 | 18               | 0.0         | 0.0              |                   |
| Paraquat | 10  | DJ694 | 9.1 | ♂   | 6                | 40  | 10.8 | 12               | 40   | 12.4 | 16               | 40         | 11.0 | 12               | 0.0         | 0.0              |                   |
| Paraquat | 10  | DJ694 | 9.1 | ♂   | 7                | 43  | 13.1 | 22               | 42   | 13.3 | 18               | 41         | 12.8 | 18               | -1.8        | 0.0              | 0.4324            |
| Paraquat | 10  | DJ694 | 9.1 | ♂   | 8                | 40  | 11.4 | 16               | 40   | 9.5  | 12               | 40         | 11.7 | 16               | 2.6         | 0.0              | 0.5051            |
| Paraquat | 10  | DJ694 | 3.2 | ♀   | 1                | 38  | 19.1 | 40               | 35   | 19.7 | 35               | 40         | 19.6 | 40               | 0.0         | 0.0              |                   |
| Paraquat | 10  | DJ694 | 3.2 | ♀   | 2                | 40  | 19.2 | 33               | 40   | 12.4 | 16               | 40         | 15.8 | 20               | 0.0         | 0.0              |                   |
| Paraquat | 10  | DJ694 | 3.2 | ♀   | 3                | 35  | 17.1 | 30               | 39   | 20.9 | 38               | 43         | 19.7 | 42               | 0.0         | 10.5             |                   |
| Paraquat | 10  | DJ694 | 3.2 | ♀   | 4                | 40  | 14.0 | 24               | 40   | 13.0 | 16               | 40         | 12.8 | 34               | -1.5        | 41.7             | 0.3058            |
| Paraquat | 10  | DJ694 | 3.2 | ♀   | 5                | 40  | 17.3 | 25               | 40   | 13.2 | 16               | 40         | 18.0 | 33               | 4.1         | 32.0             | 0.5341            |
| Paraquat | 10  | DJ694 | 3.2 | ♀   | 6                | 40  | 22.2 | 42               | 34   | 16.9 | 35               | 38         | 20.6 | 61               | 0.0         | 45.2             |                   |

Table S2

| Stress   | Age | Gal4  | UAS  | Sex | Rep <sup>1</sup> | UAS |      |                  | Gal4 |      |                  | Gal4 + UAS |      |                  | % Extension |                  | P                 |
|----------|-----|-------|------|-----|------------------|-----|------|------------------|------|------|------------------|------------|------|------------------|-------------|------------------|-------------------|
|          |     |       |      |     |                  | n   | Mean | Max <sup>2</sup> | n    | Mean | Max <sup>2</sup> | n          | Mean | Max <sup>2</sup> | Mean        | Max <sup>2</sup> |                   |
| Paraquat | 10  | DJ694 | 3.2  | ♀   | 7                | 30  | 14.7 | 24               | 40   | 13.6 | 24               | 40         | 12.3 | 20               | -9.6        | -16.7            | <b>0.0287</b>     |
| Paraquat | 10  | DJ694 | 3.2  | ♀   | 8                | 39  | 19.9 | 35               | 38   | 16.1 | 26               | 34         | 23.6 | 42               | 18.5        | 20.0             | 0.0589            |
| Paraquat | 10  | DJ694 | 3.2  | ♀   | 9                | 40  | 15.6 | 34               | 40   | 11.4 | 16               | 40         | 13.0 | 20               | 0.0         | 0.0              |                   |
| Paraquat | 10  | DJ694 | 3.2  | ♂   | 1                | 38  | 24.3 | 45               | 39   | 24.0 | 63               | 40         | 47.4 | 75               | 94.6        | 19.0             | <b>&lt;0.0001</b> |
| Paraquat | 10  | DJ694 | 3.2  | ♂   | 2                | 40  | 18.3 | 25               | 40   | 15.1 | 20               | 40         | 25.1 | 48               | 37.0        | 92.0             | <b>0.0016</b>     |
| Paraquat | 10  | DJ694 | 3.2  | ♂   | 3                | 38  | 25.0 | 42               | 44   | 14.4 | 18               | 41         | 29.2 | 61               | 17.0        | 45.2             | 0.4007            |
| Paraquat | 10  | DJ694 | 3.2  | ♂   | 4                | 40  | 14.0 | 20               | 40   | 10.6 | 16               | 40         | 16.1 | 39               | 15.2        | 95.0             | <b>0.0009</b>     |
| Paraquat | 10  | DJ694 | 3.2  | ♂   | 5                | 40  | 18.4 | 33               | 40   | 14.2 | 20               | 40         | 24.9 | 58               | 35.1        | 75.8             | <b>0.0019</b>     |
| Paraquat | 10  | DJ694 | 3.2  | ♂   | 6                | 38  | 24.3 | 61               | 38   | 12.4 | 18               | 40         | 34.8 | 61               | 43.1        | 0.0              | <b>&lt;0.0001</b> |
| Paraquat | 10  | DJ694 | 3.2  | ♂   | 7                | 40  | 14.9 | 20               | 40   | 12.4 | 16               | 40         | 17.3 | 63               | 16.1        | 215.0            | <b>0.0057</b>     |
| Paraquat | 10  | DJ694 | 3.2  | ♂   | 8                | 39  | 29.8 | 61               | 42   | 13.3 | 18               | 44         | 27.1 | 70               | 0.0         | 14.8             |                   |
| Paraquat | 10  | DJ694 | 3.2  | ♂   | 9                | 40  | 15.2 | 20               | 40   | 9.5  | 12               | 40         | 14.1 | 24               | 0.0         | 20.0             |                   |
| Paraquat | 10  | DJ694 | 10.1 | ♀   | 1                | 29  | 17.3 | 22               | 24   | 17.0 | 17               | 39         | 17.4 | 22               | 0.2         | 0.0              | 0.1672            |
| Paraquat | 10  | DJ694 | 10.1 | ♀   | 2                | 40  | 18.9 | 27               | 39   | 15.9 | 21               | 40         | 16.0 | 27               | 0.0         | 0.0              |                   |
| Paraquat | 10  | DJ694 | 10.1 | ♀   | 3                | 36  | 22.9 | 38               | 39   | 20.9 | 38               | 40         | 16.7 | 35               | -20.5       | -7.9             | <b>0.0011</b>     |
| Paraquat | 10  | DJ694 | 10.1 | ♀   | 4                | 40  | 15.4 | 24               | 40   | 13.0 | 16               | 40         | 9.9  | 12               | -23.8       | -25.0            | <b>&lt;0.0001</b> |
| Paraquat | 10  | DJ694 | 10.1 | ♀   | 5                | 40  | 18.8 | 27               | 40   | 14.4 | 21               | 40         | 18.8 | 40               | 0.4         | 48.1             | <b>0.0004</b>     |
| Paraquat | 10  | DJ694 | 10.1 | ♀   | 6                | 36  | 27.9 | 61               | 34   | 16.9 | 35               | 31         | 16.6 | 30               | -2.0        | -14.3            | 0.9156            |
| Paraquat | 10  | DJ694 | 10.1 | ♀   | 7                | 40  | 17.6 | 34               | 40   | 13.6 | 24               | 40         | 12.3 | 20               | -9.6        | -16.7            | 0.0900            |
| Paraquat | 10  | DJ694 | 10.1 | ♀   | 8                | 37  | 24.2 | 38               | 38   | 16.1 | 26               | 40         | 23.0 | 38               | 0.0         | 0.0              |                   |
| Paraquat | 10  | DJ694 | 10.1 | ♀   | 9                | 40  | 15.3 | 20               | 40   | 11.4 | 16               | 40         | 11.7 | 20               | 0.0         | 0.0              |                   |
| Paraquat | 10  | DJ694 | 10.1 | ♂   | 1                | 37  | 18.8 | 28               | 29   | 24.5 | 48               | 35         | 42.3 | 73               | 72.6        | 52.1             | <b>0.0002</b>     |
| Paraquat | 10  | DJ694 | 10.1 | ♂   | 2                | 40  | 25.9 | 40               | 40   | 15.0 | 21               | 40         | 22.9 | 40               | 0.0         | 0.0              |                   |
| Paraquat | 10  | DJ694 | 10.1 | ♂   | 3                | 38  | 25.9 | 61               | 44   | 14.4 | 18               | 43         | 28.8 | 70               | 11.1        | 14.8             | 0.3863            |
| Paraquat | 10  | DJ694 | 10.1 | ♂   | 4                | 40  | 13.3 | 20               | 40   | 10.6 | 16               | 40         | 12.7 | 34               | 0.0         | 70.0             |                   |
| Paraquat | 10  | DJ694 | 10.1 | ♂   | 5                | 40  | 20.6 | 40               | 39   | 14.7 | 21               | 39         | 15.9 | 21               | 0.0         | 0.0              |                   |
| Paraquat | 10  | DJ694 | 10.1 | ♂   | 6                | 37  | 25.4 | 42               | 38   | 12.4 | 18               | 32         | 19.6 | 42               | 0.0         | 0.0              |                   |
| Paraquat | 10  | DJ694 | 10.1 | ♂   | 7                | 40  | 17.2 | 46               | 40   | 12.4 | 16               | 40         | 14.6 | 39               | 0.0         | 0.0              |                   |
| Paraquat | 10  | DJ694 | 10.1 | ♂   | 8                | 39  | 24.7 | 42               | 42   | 13.3 | 18               | 42         | 34.0 | 70               | 37.9        | 66.7             | <b>0.0053</b>     |
| Paraquat | 10  | DJ694 | 10.1 | ♂   | 9                | 40  | 14.9 | 24               | 40   | 9.5  | 12               | 38         | 24.6 | 63               | 65.5        | 162.5            | <b>&lt;0.0001</b> |
| Paraquat | 10  | DJ694 | 3.1  | ♀   | 1                | 40  | 12.5 | 22               | 40   | 15.9 | 26               | 40         | 14.4 | 22               | 0.0         | 0.0              |                   |
| Paraquat | 10  | DJ694 | 3.1  | ♀   | 2                | 43  | 14.0 | 22               | 39   | 20.9 | 38               | 38         | 13.3 | 26               | -5.3        | 0.0              | 0.2802            |
| Paraquat | 10  | DJ694 | 3.1  | ♀   | 3                | 40  | 13.8 | 20               | 40   | 13.0 | 16               | 40         | 9.9  | 12               | -23.8       | -25.0            | <b>&lt;0.0001</b> |
| Paraquat | 10  | DJ694 | 3.1  | ♀   | 4                | 40  | 17.9 | 30               | 34   | 16.9 | 35               | 35         | 12.6 | 18               | -25.3       | -40.0            | <b>0.0036</b>     |
| Paraquat | 10  | DJ694 | 3.1  | ♀   | 5                | 44  | 18.2 | 35               | 38   | 16.1 | 26               | 47         | 16.1 | 26               | 0.0         | 0.0              |                   |
| Paraquat | 10  | DJ694 | 3.1  | ♂   | 1                | 33  | 23.5 | 34               | 38   | 30.0 | 61               | 39         | 42.1 | 79               | 40.2        | 29.5             | <b>0.0110</b>     |
| Paraquat | 10  | DJ694 | 3.1  | ♂   | 2                | 41  | 19.1 | 35               | 44   | 14.4 | 18               | 40         | 18.1 | 35               | 0.0         | 0.0              |                   |
| Paraquat | 10  | DJ694 | 3.1  | ♂   | 3                | 40  | 12.4 | 20               | 40   | 10.6 | 16               | 40         | 12.4 | 16               | 0.0         | 0.0              |                   |
| Paraquat | 10  | DJ694 | 3.1  | ♂   | 4                | 42  | 16.6 | 30               | 38   | 12.4 | 18               | 35         | 17.7 | 38               | 6.9         | 26.7             | <b>0.0026</b>     |
| Paraquat | 10  | DJ694 | 3.1  | ♂   | 5                | 42  | 15.1 | 26               | 42   | 13.3 | 18               | 33         | 17.5 | 35               | 15.5        | 34.6             | <b>0.0002</b>     |
| Paraquat | 10  | DJ694 | 4.4  | ♀   | 1                | 40  | 22.0 | 45               | 40   | 22.4 | 40               | 40         | 22.5 | 35               | 0.6         | -12.5            | 0.5867            |
| Paraquat | 10  | DJ694 | 4.4  | ♀   | 2                | 40  | 26.2 | 43               | 40   | 16.8 | 31               | 40         | 17.6 | 31               | 0.0         | 0.0              |                   |
| Paraquat | 10  | DJ694 | 4.4  | ♀   | 3                | 40  | 19.8 | 27               | 39   | 15.9 | 21               | 40         | 15.5 | 21               | -2.7        | 0.0              | <b>0.0001</b>     |
| Paraquat | 10  | DJ694 | 4.4  | ♀   | 4                | 40  | 17.0 | 26               | 39   | 20.9 | 38               | 41         | 16.0 | 30               | -6.0        | 0.0              | <b>0.0002</b>     |
| Paraquat | 10  | DJ694 | 4.4  | ♀   | 5                | 40  | 13.0 | 20               | 40   | 13.0 | 16               | 40         | 12.7 | 20               | -2.3        | 0.0              | 0.5633            |
| Paraquat | 10  | DJ694 | 4.4  | ♀   | 6                | 40  | 19.8 | 40               | 40   | 14.4 | 21               | 40         | 15.9 | 21               | 0.0         | 0.0              |                   |
| Paraquat | 10  | DJ694 | 4.4  | ♀   | 7                | 41  | 23.9 | 30               | 34   | 16.9 | 35               | 43         | 14.7 | 22               | -13.4       | -26.7            | 0.0999            |
| Paraquat | 10  | DJ694 | 4.4  | ♀   | 8                | 40  | 16.0 | 20               | 40   | 13.6 | 24               | 40         | 11.7 | 16               | -14.0       | -20.0            | <b>0.0036</b>     |
| Paraquat | 10  | DJ694 | 4.4  | ♀   | 9                | 34  | 20.5 | 35               | 38   | 16.1 | 26               | 42         | 12.7 | 18               | -21.2       | -30.8            | <b>0.0009</b>     |

Table S2

| Stress   | Age | Gal4  | UAS | Sex | Rep <sup>1</sup> | UAS |      |                  | Gal4 |      |                  | Gal4 + UAS |      |                  | % Extension |                  | P      |
|----------|-----|-------|-----|-----|------------------|-----|------|------------------|------|------|------------------|------------|------|------------------|-------------|------------------|--------|
|          |     |       |     |     |                  | n   | Mean | Max <sup>2</sup> | n    | Mean | Max <sup>2</sup> | n          | Mean | Max <sup>2</sup> | Mean        | Max <sup>2</sup> |        |
| Paraquat | 10  | DJ694 | 4.4 | ♀   | 10               | 40  | 13.0 | 20               | 40   | 11.4 | 16               | 40         | 9.7  | 12               | -14.9       | -25.0            | 0.0013 |
| Paraquat | 10  | DJ694 | 4.4 | ♂   | 1                | 40  | 25.9 | 55               | 40   | 19.5 | 30               | 45         | 23.8 | 35               | 0.0         | 0.0              | 0.5747 |
| Paraquat | 10  | DJ694 | 4.4 | ♂   | 2                | 39  | 29.7 | 43               | 40   | 19.5 | 43               | 39         | 31.9 | 69               | 7.3         | 60.5             |        |
| Paraquat | 10  | DJ694 | 4.4 | ♂   | 3                | 40  | 24.8 | 40               | 40   | 15.0 | 21               | 40         | 20.5 | 40               | 0.0         | 0.0              |        |
| Paraquat | 10  | DJ694 | 4.4 | ♂   | 4                | 41  | 17.9 | 26               | 44   | 14.4 | 18               | 40         | 16.8 | 30               | 0.0         | 15.4             |        |
| Paraquat | 10  | DJ694 | 4.4 | ♂   | 5                | 40  | 13.2 | 20               | 40   | 10.6 | 16               | 40         | 11.9 | 16               | 0.0         | 0.0              |        |
| Paraquat | 10  | DJ694 | 4.4 | ♂   | 6                | 40  | 18.4 | 27               | 39   | 14.7 | 21               | 40         | 20.6 | 40               | 12.4        | 48.1             |        |
| Paraquat | 10  | DJ694 | 4.4 | ♂   | 7                | 40  | 17.0 | 26               | 38   | 12.4 | 18               | 40         | 17.1 | 30               | 0.6         | 15.4             |        |
| Paraquat | 10  | DJ694 | 4.4 | ♂   | 8                | 39  | 14.1 | 24               | 40   | 12.4 | 16               | 40         | 11.6 | 16               | -6.5        | 0.0              |        |
| Paraquat | 10  | DJ694 | 4.4 | ♂   | 9                | 39  | 15.2 | 22               | 42   | 13.3 | 18               | 37         | 14.8 | 22               | 0.0         | 0.0              |        |
| Paraquat | 10  | DJ694 | 4.4 | ♂   | 10               | 40  | 12.4 | 20               | 40   | 9.5  | 12               | 40         | 12.3 | 20               | 0.0         | 0.0              |        |
| Paraquat | 10  | D42   | 2.1 | ♀   | 1                | 40  | 25.3 | 52               | 40   | 24.3 | 47               | 40         | 20.1 | 42               | -17.0       | -10.6            | 0.0236 |
| Paraquat | 10  | D42   | 2.1 | ♀   | 2                | 40  | 17.9 | 26               | 40   | 24.5 | 61               | 40         | 14.6 | 26               | -18.4       | 0.0              | 0.0014 |
| Paraquat | 10  | D42   | 2.1 | ♀   | 3                | 36  | 18.6 | 26               | 41   | 36.7 | 61               | 40         | 22.4 | 30               | 0.0         | 0.0              | 0.0211 |
| Paraquat | 10  | D42   | 2.1 | ♀   | 4                | 41  | 19.3 | 22               | 58   | 28.5 | 61               | 44         | 19.9 | 42               | 0.0         | 0.0              |        |
| Paraquat | 10  | D42   | 2.1 | ♂   | 1                | 40  | 24.5 | 47               | 40   | 25.9 | 52               | 40         | 21.3 | 37               | -13.3       | -21.3            |        |
| Paraquat | 10  | D42   | 2.1 | ♂   | 2                | 41  | 17.6 | 26               | 41   | 23.5 | 38               | 38         | 21.8 | 30               | 0.0         | 0.0              |        |
| Paraquat | 10  | D42   | 2.1 | ♂   | 3                | 40  | 15.4 | 22               | 40   | 19.9 | 26               | 40         | 17.4 | 26               | 0.0         | 0.0              |        |
| Paraquat | 10  | D42   | 2.1 | ♂   | 4                | 40  | 15.9 | 30               | 44   | 20.7 | 38               | 41         | 16.8 | 30               | 0.0         | 0.0              |        |
| Paraquat | 10  | D42   | 4.3 | ♀   | 1                | 40  | 20.8 | 31               | 39   | 22.9 | 43               | 40         | 19.5 | 31               | -6.1        | 0.0              |        |
| Paraquat | 10  | D42   | 4.3 | ♀   | 2                | 40  | 18.2 | 33               | 40   | 14.5 | 25               | 40         | 14.5 | 16               | -0.2        | -36.0            |        |
| Paraquat | 10  | D42   | 4.3 | ♀   | 3                | 40  | 18.5 | 26               | 40   | 24.5 | 61               | 42         | 15.5 | 26               | -16.5       | 0.0              |        |
| Paraquat | 10  | D42   | 4.3 | ♀   | 4                | 40  | 15.8 | 25               | 40   | 14.7 | 20               | 40         | 14.7 | 20               | 0.0         | 0.0              |        |
| Paraquat | 10  | D42   | 4.3 | ♀   | 5                | 42  | 24.3 | 42               | 41   | 36.7 | 61               | 44         | 24.0 | 38               | -1.2        | -9.5             |        |
| Paraquat | 10  | D42   | 4.3 | ♀   | 6                | 42  | 19.5 | 26               | 58   | 28.5 | 61               | 39         | 16.5 | 26               | -15.6       | 0.0              |        |
| Paraquat | 10  | D42   | 4.3 | ♂   | 1                | 40  | 20.5 | 31               | 40   | 26.8 | 43               | 40         | 17.2 | 22               | -16.1       | -29.0            |        |
| Paraquat | 10  | D42   | 4.3 | ♂   | 2                | 40  | 13.4 | 20               | 40   | 13.2 | 20               | 40         | 10.7 | 16               | -18.6       | -20.0            |        |
| Paraquat | 10  | D42   | 4.3 | ♂   | 3                | 58  | 18.7 | 26               | 41   | 23.5 | 38               | 40         | 20.9 | 35               | 0.0         | 0.0              |        |
| Paraquat | 10  | D42   | 4.3 | ♂   | 4                | 40  | 14.0 | 20               | 40   | 14.4 | 72               | 40         | 10.5 | 20               | -25.0       | 0.0              |        |
| Paraquat | 10  | D42   | 4.3 | ♂   | 5                | 42  | 16.0 | 35               | 40   | 19.9 | 26               | 42         | 22.2 | 61               | 11.5        | 74.3             |        |
| Paraquat | 10  | D42   | 4.3 | ♂   | 6                | 40  | 13.6 | 22               | 44   | 20.7 | 38               | 42         | 18.6 | 30               | 0.0         | 0.0              |        |
| Paraquat | 10  | D42   | 9.1 | ♀   | 1                | 40  | 19.0 | 27               | 40   | 21.8 | 27               | 40         | 17.5 | 27               | -7.7        | 0.0              |        |
| Paraquat | 10  | D42   | 9.1 | ♀   | 2                | 41  | 18.7 | 30               | 40   | 24.5 | 61               | 41         | 12.7 | 18               | -31.9       | -40.0            |        |
| Paraquat | 10  | D42   | 9.1 | ♀   | 3                | 41  | 18.2 | 27               | 40   | 20.2 | 40               | 39         | 21.7 | 40               | 7.4         | 0.0              |        |
| Paraquat | 10  | D42   | 9.1 | ♀   | 4                | 42  | 22.8 | 35               | 41   | 36.7 | 61               | 38         | 21.4 | 35               | -6.2        | 0.0              |        |
| Paraquat | 10  | D42   | 9.1 | ♀   | 5                | 42  | 21.0 | 30               | 58   | 28.5 | 61               | 45         | 18.8 | 35               | -10.2       | 0.0              |        |
| Paraquat | 10  | D42   | 9.1 | ♂   | 1                | 40  | 15.6 | 21               | 40   | 19.0 | 40               | 39         | 14.3 | 21               | -8.4        | 0.0              |        |
| Paraquat | 10  | D42   | 9.1 | ♂   | 2                | 38  | 16.3 | 30               | 41   | 23.5 | 38               | 39         | 15.0 | 22               | -8.1        | -26.7            |        |
| Paraquat | 10  | D42   | 9.1 | ♂   | 3                | 40  | 17.7 | 27               | 40   | 18.3 | 40               | 40         | 14.7 | 21               | -17.0       | -22.2            |        |
| Paraquat | 10  | D42   | 9.1 | ♂   | 4                | 40  | 14.1 | 22               | 40   | 19.9 | 26               | 39         | 18.0 | 30               | 0.0         | 15.4             |        |
| Paraquat | 10  | D42   | 9.1 | ♂   | 5                | 43  | 13.1 | 22               | 44   | 20.7 | 38               | 41         | 15.7 | 22               | 0.0         | 0.0              |        |
| Paraquat | 10  | D42   | 3.2 | ♀   | 1                | 38  | 19.1 | 40               | 38   | 20.3 | 40               | 40         | 18.5 | 40               | -2.9        | 0.0              |        |
| Paraquat | 10  | D42   | 3.2 | ♀   | 2                | 40  | 19.2 | 33               | 40   | 14.5 | 25               | 40         | 17.1 | 33               | 0.0         | 0.0              |        |
| Paraquat | 10  | D42   | 3.2 | ♀   | 3                | 35  | 17.1 | 30               | 40   | 24.5 | 61               | 41         | 17.5 | 35               | 0.0         | 0.0              |        |
| Paraquat | 10  | D42   | 3.2 | ♀   | 4                | 40  | 17.3 | 25               | 40   | 14.7 | 20               | 40         | 18.9 | 33               | 9.6         | 32.0             |        |
| Paraquat | 10  | D42   | 3.2 | ♀   | 5                | 40  | 22.2 | 42               | 41   | 36.7 | 61               | 41         | 18.0 | 30               | -18.9       | -28.6            |        |
| Paraquat | 10  | D42   | 3.2 | ♀   | 6                | 39  | 19.9 | 35               | 58   | 28.5 | 61               | 36         | 19.3 | 30               | -2.8        | -14.3            |        |
| Paraquat | 10  | D42   | 3.2 | ♂   | 1                | 38  | 24.3 | 45               | 37   | 24.5 | 45               | 40         | 42.2 | 69               | 72.3        | 53.3             |        |
| Paraquat | 10  | D42   | 3.2 | ♂   | 2                | 40  | 18.3 | 25               | 40   | 13.2 | 20               | 40         | 22.9 | 58               | 25.1        | 132.0            |        |



Table S2

| Stress     | Age | Gal4   | UAS  | Sex | Rep <sup>1</sup> | UAS |      |                  | Gal4 |      |                  | Gal4 + UAS |      |                  | % Extension |                  | P                 |
|------------|-----|--------|------|-----|------------------|-----|------|------------------|------|------|------------------|------------|------|------------------|-------------|------------------|-------------------|
|            |     |        |      |     |                  | n   | Mean | Max <sup>2</sup> | n    | Mean | Max <sup>2</sup> | n          | Mean | Max <sup>2</sup> | Mean        | Max <sup>2</sup> |                   |
| Paraquat   | 10  | D42    | 3.2  | ♂   | 3                | 38  | 25.0 | 42               | 41   | 23.5 | 38               | 38         | 32.0 | 61               | 28.0        | 45.2             | <b>0.0035</b>     |
| Paraquat   | 10  | D42    | 3.2  | ♂   | 4                | 40  | 18.4 | 33               | 40   | 14.4 | 72               | 40         | 21.8 | 38               | 18.2        | 0.0              | <b>0.0002</b>     |
| Paraquat   | 10  | D42    | 3.2  | ♂   | 5                | 38  | 24.3 | 61               | 40   | 19.9 | 26               | 40         | 32.3 | 82               | 32.9        | 34.4             | <b>0.0038</b>     |
| Paraquat   | 10  | D42    | 3.2  | ♂   | 6                | 39  | 29.8 | 61               | 44   | 20.7 | 38               | 45         | 33.6 | 70               | 12.6        | 14.8             | 0.1980            |
| Paraquat   | 10  | D42    | 10.1 | ♀   | 1                | 29  | 17.3 | 22               | 31   | 17.3 | 22               | 40         | 20.5 | 42               | 18.2        | 90.9             | <b>0.0133</b>     |
| Paraquat   | 10  | D42    | 10.1 | ♀   | 2                | 40  | 18.9 | 27               | 40   | 21.8 | 27               | 39         | 19.8 | 27               | 0.0         | 0.0              |                   |
| Paraquat   | 10  | D42    | 10.1 | ♀   | 3                | 36  | 22.9 | 38               | 40   | 24.5 | 61               | 41         | 18.8 | 30               | -18.1       | -21.1            | <b>0.0089</b>     |
| Paraquat   | 10  | D42    | 10.1 | ♀   | 4                | 40  | 18.8 | 27               | 40   | 20.2 | 40               | 40         | 19.1 | 40               | 0.0         | 0.0              |                   |
| Paraquat   | 10  | D42    | 10.1 | ♀   | 5                | 36  | 27.9 | 61               | 41   | 36.7 | 61               | 41         | 16.9 | 38               | -39.4       | -37.7            | <b>&lt;0.0001</b> |
| Paraquat   | 10  | D42    | 10.1 | ♀   | 6                | 37  | 24.2 | 38               | 58   | 28.5 | 61               | 36         | 17.0 | 38               | -29.9       | 0.0              | <b>0.0003</b>     |
| Paraquat   | 10  | D42    | 10.1 | ♂   | 1                | 37  | 18.8 | 28               | 36   | 19.9 | 42               | 35         | 55.1 | 100              | 177.4       | 138.1            | <b>&lt;0.0001</b> |
| Paraquat   | 10  | D42    | 10.1 | ♂   | 2                | 40  | 25.9 | 40               | 40   | 19.0 | 40               | 40         | 20.2 | 27               | 0.0         | -32.5            |                   |
| Paraquat   | 10  | D42    | 10.1 | ♂   | 3                | 38  | 25.9 | 61               | 41   | 23.5 | 38               | 37         | 29.4 | 82               | 13.3        | 34.4             | <b>0.0414</b>     |
| Paraquat   | 10  | D42    | 10.1 | ♂   | 4                | 40  | 20.6 | 40               | 40   | 18.3 | 40               | 40         | 17.5 | 27               | -4.5        | -32.5            | <b>0.0066</b>     |
| Paraquat   | 10  | D42    | 10.1 | ♂   | 5                | 37  | 25.4 | 42               | 40   | 19.9 | 26               | 38         | 26.7 | 42               | 5.2         | 0.0              | 0.5106            |
| Paraquat   | 10  | D42    | 10.1 | ♂   | 6                | 39  | 24.7 | 42               | 44   | 20.7 | 38               | 49         | 26.7 | 61               | 8.4         | 45.2             | <b>0.0115</b>     |
| Paraquat   | 10  | D42    | 3.1  | ♀   | 1                | 40  | 12.5 | 22               | 39   | 16.9 | 50               | 40         | 16.5 | 34               | 0.0         | 0.0              |                   |
| Paraquat   | 10  | D42    | 3.1  | ♀   | 2                | 43  | 14.0 | 22               | 40   | 24.5 | 61               | 43         | 13.8 | 22               | -1.3        | 0.0              | 0.7175            |
| Paraquat   | 10  | D42    | 3.1  | ♀   | 3                | 40  | 17.9 | 30               | 41   | 36.7 | 61               | 28         | 12.9 | 26               | -28.2       | -13.3            | <b>0.0011</b>     |
| Paraquat   | 10  | D42    | 3.1  | ♀   | 4                | 44  | 18.2 | 35               | 58   | 28.5 | 61               | 39         | 13.0 | 18               | -28.8       | -48.6            | <b>&lt;0.0001</b> |
| Paraquat   | 10  | D42    | 3.1  | ♂   | 1                | 33  | 23.5 | 34               | 37   | 35.9 | 79               | 38         | 42.3 | 79               | 17.7        | 0.0              | 0.2826            |
| Paraquat   | 10  | D42    | 3.1  | ♂   | 2                | 41  | 19.1 | 35               | 41   | 23.5 | 38               | 40         | 22.1 | 35               | 0.0         | 0.0              |                   |
| Paraquat   | 10  | D42    | 3.1  | ♂   | 3                | 42  | 16.6 | 30               | 40   | 19.9 | 26               | 37         | 18.4 | 38               | 0.0         | 26.7             |                   |
| Paraquat   | 10  | D42    | 3.1  | ♂   | 4                | 42  | 15.1 | 26               | 44   | 20.7 | 38               | 39         | 18.5 | 35               | 0.0         | 0.0              |                   |
| Paraquat   | 10  | D42    | 4.4  | ♀   | 1                | 40  | 22.0 | 45               | 40   | 24.8 | 40               | 40         | 21.6 | 30               | -1.7        | -25.0            | <b>0.0119</b>     |
| Paraquat   | 10  | D42    | 4.4  | ♀   | 2                | 40  | 26.2 | 43               | 39   | 22.9 | 43               | 40         | 22.0 | 43               | -3.8        | 0.0              | <b>0.0465</b>     |
| Paraquat   | 10  | D42    | 4.4  | ♀   | 3                | 40  | 19.8 | 27               | 40   | 21.8 | 27               | 40         | 19.0 | 40               | -3.9        | 48.1             | <b>0.0138</b>     |
| Paraquat   | 10  | D42    | 4.4  | ♀   | 4                | 40  | 17.0 | 26               | 40   | 24.5 | 61               | 44         | 14.3 | 26               | -16.0       | 0.0              | <b>0.0218</b>     |
| Paraquat   | 10  | D42    | 4.4  | ♀   | 5                | 40  | 19.8 | 40               | 40   | 20.2 | 40               | 40         | 20.3 | 40               | 0.2         | 0.0              | 0.7853            |
| Paraquat   | 10  | D42    | 4.4  | ♀   | 6                | 41  | 23.9 | 30               | 41   | 36.7 | 61               | 28         | 11.1 | 14               | -53.3       | -53.3            | <b>&lt;0.0001</b> |
| Paraquat   | 10  | D42    | 4.4  | ♀   | 7                | 34  | 20.5 | 35               | 58   | 28.5 | 61               | 41         | 12.8 | 18               | -37.4       | -48.6            | <b>&lt;0.0001</b> |
| Paraquat   | 10  | D42    | 4.4  | ♂   | 1                | 40  | 25.9 | 55               | 40   | 29.1 | 55               | 40         | 28.4 | 60               | 0.0         | 9.1              |                   |
| Paraquat   | 10  | D42    | 4.4  | ♂   | 2                | 39  | 29.7 | 43               | 40   | 26.8 | 43               | 40         | 22.9 | 31               | -14.6       | -27.9            | <b>0.0001</b>     |
| Paraquat   | 10  | D42    | 4.4  | ♂   | 3                | 40  | 24.8 | 40               | 40   | 19.0 | 40               | 40         | 17.9 | 40               | -5.8        | 0.0              | <b>0.0007</b>     |
| Paraquat   | 10  | D42    | 4.4  | ♂   | 4                | 41  | 17.9 | 26               | 41   | 23.5 | 38               | 40         | 15.6 | 26               | -13.0       | 0.0              | <b>0.0311</b>     |
| Paraquat   | 10  | D42    | 4.4  | ♂   | 5                | 40  | 18.4 | 27               | 40   | 18.3 | 40               | 39         | 16.9 | 27               | -7.5        | 0.0              | 0.1100            |
| Paraquat   | 10  | D42    | 4.4  | ♂   | 6                | 40  | 17.0 | 26               | 40   | 19.9 | 26               | 35         | 16.1 | 30               | -5.4        | 15.4             | 0.0763            |
| Paraquat   | 10  | D42    | 4.4  | ♂   | 7                | 39  | 15.2 | 22               | 44   | 20.7 | 38               | 43         | 22.3 | 35               | 7.7         | 0.0              | 0.6678            |
| Starvation | 3   | daGal4 | 2.1  | ♀   | 1                | 40  | 54.3 | 73               | 40   | 54.6 | 68               | 40         | 56.9 | 73               | 4.2         | 0.0              | 0.2560            |
| Starvation | 3   | daGal4 | 2.1  | ♀   | 2                | 40  | 28.7 | 40               | 40   | 28.6 | 40               | 40         | 31.2 | 40               | 8.7         | 0.0              | 0.0992            |
| Starvation | 3   | daGal4 | 2.1  | ♀   | 3                | 40  | 29.5 | 34               | 40   | 29.7 | 38               | 40         | 31.1 | 42               | 4.7         | 10.5             | 0.0574            |
| Starvation | 3   | daGal4 | 2.1  | ♀   | 4                | 40  | 29.0 | 40               | 40   | 23.3 | 32               | 40         | 32.1 | 48               | 10.8        | 20.0             | <b>0.0412</b>     |
| Starvation | 3   | daGal4 | 2.1  | ♀   | 5                | 40  | 29.2 | 34               | 40   | 32.5 | 42               | 41         | 35.2 | 42               | 8.2         | 0.0              | 0.2027            |
| Starvation | 3   | daGal4 | 2.1  | ♀   | 6                | 40  | 30.2 | 34               | 41   | 32.0 | 38               | 40         | 34.1 | 38               | 6.7         | 0.0              | 0.1151            |
| Starvation | 3   | daGal4 | 2.1  | ♂   | 1                | 40  | 37.9 | 53               | 40   | 38.4 | 53               | 40         | 36.7 | 48               | -3.1        | -9.4             | 0.2710            |
| Starvation | 3   | daGal4 | 2.1  | ♂   | 2                | 40  | 17.0 | 20               | 40   | 16.5 | 20               | 40         | 17.5 | 20               | 3.2         | 0.0              | 0.1174            |
| Starvation | 3   | daGal4 | 2.1  | ♂   | 3                | 40  | 21.6 | 26               | 40   | 21.9 | 26               | 41         | 23.8 | 46               | 8.5         | 76.9             | <b>0.0355</b>     |
| Starvation | 3   | daGal4 | 2.1  | ♂   | 4                | 40  | 17.1 | 20               | 40   | 18.5 | 27               | 40         | 17.1 | 27               | 0.0         | 0.0              |                   |
| Starvation | 3   | daGal4 | 2.1  | ♂   | 5                | 40  | 22.8 | 30               | 40   | 23.1 | 30               | 40         | 23.6 | 30               | 2.2         | 0.0              | 0.2027            |

Table S2

| Stress     | Age | Gal4   | UAS  | Sex | Rep <sup>1</sup> | UAS |      |                  | Gal4 |      |                  | Gal4 + UAS |      |                  | % Extension |                  | P                 |
|------------|-----|--------|------|-----|------------------|-----|------|------------------|------|------|------------------|------------|------|------------------|-------------|------------------|-------------------|
|            |     |        |      |     |                  | n   | Mean | Max <sup>2</sup> | n    | Mean | Max <sup>2</sup> | n          | Mean | Max <sup>2</sup> | Mean        | Max <sup>2</sup> |                   |
| Starvation | 3   | daGal4 | 2.1  | ♂   | 6                | 40  | 23.4 | 30               | 40   | 24.3 | 34               | 40         | 24.3 | 30               | 0.0         | 0.0              |                   |
| Starvation | 3   | daGal4 | 4.3  | ♀   | 1                | 40  | 28.5 | 34               | 40   | 29.7 | 38               | 40         | 32.7 | 38               | 10.1        | 0.0              | <b>0.0034</b>     |
| Starvation | 3   | daGal4 | 4.3  | ♀   | 2                | 40  | 29.6 | 38               | 40   | 32.5 | 42               | 40         | 33.9 | 38               | 4.3         | 0.0              | <b>0.0004</b>     |
| Starvation | 3   | daGal4 | 4.3  | ♀   | 3                | 40  | 30.5 | 42               | 41   | 32.0 | 38               | 30         | 32.9 | 42               | 3.1         | 0.0              | <b>0.0306</b>     |
| Starvation | 3   | daGal4 | 4.3  | ♂   | 1                | 40  | 23.6 | 26               | 40   | 21.9 | 26               | 40         | 25.5 | 30               | 8.1         | 15.4             | <b>0.0123</b>     |
| Starvation | 3   | daGal4 | 4.3  | ♂   | 2                | 40  | 22.2 | 26               | 40   | 23.1 | 30               | 40         | 22.8 | 30               | 0.0         | 0.0              |                   |
| Starvation | 3   | daGal4 | 4.3  | ♂   | 3                | 40  | 22.8 | 30               | 40   | 24.3 | 34               | 40         | 24.2 | 34               | 0.0         | 0.0              |                   |
| Starvation | 3   | daGal4 | 9.1  | ♀   | 1                | 41  | 30.7 | 41               | 39   | 29.0 | 41               | 40         | 28.1 | 41               | -3.3        | 0.0              | 0.3129            |
| Starvation | 3   | daGal4 | 9.1  | ♀   | 2                | 40  | 30.2 | 34               | 40   | 29.7 | 38               | 40         | 30.3 | 34               | 0.3         | 0.0              | 0.6507            |
| Starvation | 3   | daGal4 | 9.1  | ♀   | 3                | 40  | 30.9 | 32               | 38   | 30.1 | 41               | 39         | 28.6 | 41               | -5.2        | 0.0              | 0.4383            |
| Starvation | 3   | daGal4 | 9.1  | ♀   | 4                | 40  | 33.5 | 42               | 40   | 32.5 | 42               | 40         | 29.9 | 38               | -8.0        | -9.5             | <b>0.0007</b>     |
| Starvation | 3   | daGal4 | 9.1  | ♀   | 5                | 40  | 32.8 | 42               | 41   | 32.0 | 38               | 41         | 30.7 | 38               | -4.0        | 0.0              | <b>0.0115</b>     |
| Starvation | 3   | daGal4 | 9.1  | ♂   | 1                | 40  | 13.8 | 16               | 39   | 14.4 | 23               | 39         | 16.3 | 23               | 13.2        | 0.0              | <b>0.0049</b>     |
| Starvation | 3   | daGal4 | 9.1  | ♂   | 2                | 40  | 23.7 | 30               | 40   | 21.9 | 26               | 40         | 20.2 | 22               | -7.8        | -15.4            | <b>0.0028</b>     |
| Starvation | 3   | daGal4 | 9.1  | ♂   | 3                | 40  | 15.0 | 23               | 38   | 14.4 | 23               | 39         | 15.6 | 23               | 4.1         | 0.0              | 0.2116            |
| Starvation | 3   | daGal4 | 9.1  | ♂   | 4                | 40  | 23.7 | 30               | 40   | 23.1 | 30               | 40         | 21.2 | 22               | -8.2        | -26.7            | <b>0.0002</b>     |
| Starvation | 3   | daGal4 | 9.1  | ♂   | 5                | 40  | 25.1 | 30               | 40   | 24.3 | 34               | 40         | 21.2 | 26               | -12.8       | -13.3            | <b>&lt;0.0001</b> |
| Starvation | 3   | daGal4 | 3.2  | ♀   | 1                | 35  | 34.0 | 52               | 40   | 55.3 | 72               | 40         | 56.4 | 77               | 2.0         | 6.9              | 0.2976            |
| Starvation | 3   | daGal4 | 3.2  | ♀   | 2                | 42  | 32.7 | 42               | 40   | 29.7 | 38               | 41         | 32.6 | 42               | 0.0         | 0.0              |                   |
| Starvation | 3   | daGal4 | 3.2  | ♀   | 3                | 40  | 32.5 | 38               | 40   | 32.5 | 42               | 40         | 37.0 | 46               | 13.8        | 9.5              | <b>0.0014</b>     |
| Starvation | 3   | daGal4 | 3.2  | ♀   | 4                | 40  | 35.1 | 42               | 41   | 32.0 | 38               | 41         | 37.9 | 46               | 8.0         | 9.5              | <b>0.0054</b>     |
| Starvation | 3   | daGal4 | 3.2  | ♂   | 1                | 40  | 27.7 | 37               | 40   | 30.6 | 42               | 40         | 38.0 | 52               | 24.1        | 23.8             | <b>&lt;0.0001</b> |
| Starvation | 3   | daGal4 | 3.2  | ♂   | 2                | 40  | 23.9 | 30               | 40   | 21.9 | 26               | 40         | 23.3 | 30               | 0.0         | 0.0              |                   |
| Starvation | 3   | daGal4 | 3.2  | ♂   | 3                | 40  | 24.0 | 38               | 40   | 23.1 | 30               | 40         | 25.0 | 30               | 4.2         | 0.0              | <b>0.0186</b>     |
| Starvation | 3   | daGal4 | 3.2  | ♂   | 4                | 40  | 25.0 | 34               | 40   | 24.3 | 34               | 20         | 25.2 | 30               | 0.8         | -11.8            | 0.4527            |
| Starvation | 3   | daGal4 | 10.1 | ♀   | 1                | 40  | 68.7 | 84               | 40   | 58.1 | 72               | 40         | 76.6 | 120              | 11.5        | 42.9             | <b>0.0146</b>     |
| Starvation | 3   | daGal4 | 10.1 | ♀   | 2                | 40  | 30.5 | 41               | 39   | 29.0 | 41               | 40         | 34.3 | 41               | 12.4        | 0.0              | <b>0.0046</b>     |
| Starvation | 3   | daGal4 | 10.1 | ♀   | 3                | 40  | 33.0 | 38               | 40   | 29.7 | 38               | 39         | 35.2 | 46               | 6.8         | 21.1             | <b>0.0042</b>     |
| Starvation | 3   | daGal4 | 10.1 | ♀   | 4                | 41  | 36.7 | 50               | 40   | 32.5 | 42               | 38         | 38.5 | 50               | 4.9         | 0.0              | 0.1078            |
| Starvation | 3   | daGal4 | 10.1 | ♀   | 5                | 40  | 37.9 | 50               | 41   | 32.0 | 38               | 41         | 39.3 | 50               | 3.8         | 0.0              | 0.0693            |
| Starvation | 3   | daGal4 | 10.1 | ♂   | 1                | 40  | 54.9 | 84               | 40   | 44.8 | 59               | 40         | 59.6 | 84               | 8.6         | 0.0              | 0.1305            |
| Starvation | 3   | daGal4 | 10.1 | ♂   | 2                | 40  | 18.0 | 23               | 39   | 14.4 | 23               | 39         | 19.5 | 23               | 8.4         | 0.0              | 0.1063            |
| Starvation | 3   | daGal4 | 10.1 | ♂   | 3                | 40  | 24.7 | 30               | 40   | 21.9 | 26               | 40         | 27.4 | 34               | 10.9        | 13.3             | <b>0.0017</b>     |
| Starvation | 3   | daGal4 | 10.1 | ♂   | 4                | 40  | 24.0 | 30               | 40   | 23.1 | 30               | 39         | 31.2 | 42               | 30.1        | 40.0             | <b>&lt;0.0001</b> |
| Starvation | 3   | daGal4 | 10.1 | ♂   | 5                | 40  | 26.0 | 34               | 40   | 24.3 | 34               | 41         | 28.4 | 42               | 9.4         | 23.5             | <b>0.0002</b>     |
| Starvation | 3   | daGal4 | 3.1  | ♀   | 1                | 40  | 43.8 | 54               | 40   | 41.1 | 58               | 40         | 47.4 | 58               | 8.3         | 0.0              | <b>0.0014</b>     |
| Starvation | 3   | daGal4 | 3.1  | ♀   | 2                | 40  | 26.7 | 32               | 40   | 28.6 | 40               | 40         | 27.1 | 40               | 0.0         | 0.0              |                   |
| Starvation | 3   | daGal4 | 3.1  | ♀   | 3                | 40  | 27.8 | 34               | 40   | 29.7 | 38               | 41         | 32.1 | 38               | 8.2         | 0.0              | <b>0.0040</b>     |
| Starvation | 3   | daGal4 | 3.1  | ♀   | 4                | 40  | 23.4 | 32               | 40   | 23.3 | 32               | 40         | 23.4 | 40               | 0.0         | 25.0             |                   |
| Starvation | 3   | daGal4 | 3.1  | ♀   | 5                | 40  | 29.8 | 34               | 40   | 32.5 | 42               | 40         | 34.5 | 42               | 6.2         | 0.0              | 0.3871            |
| Starvation | 3   | daGal4 | 3.1  | ♀   | 6                | 40  | 31.4 | 34               | 41   | 32.0 | 38               | 38         | 34.0 | 46               | 6.4         | 21.1             | <b>0.0006</b>     |
| Starvation | 3   | daGal4 | 3.1  | ♂   | 1                | 40  | 28.8 | 38               | 39   | 29.7 | 38               | 40         | 28.0 | 34               | -2.6        | -10.5            | <b>0.0351</b>     |
| Starvation | 3   | daGal4 | 3.1  | ♂   | 2                | 40  | 15.9 | 20               | 40   | 16.5 | 20               | 40         | 16.2 | 20               | 0.0         | 0.0              |                   |
| Starvation | 3   | daGal4 | 3.1  | ♂   | 3                | 40  | 21.4 | 22               | 40   | 21.9 | 26               | 40         | 23.3 | 30               | 6.4         | 15.4             | <b>0.0006</b>     |
| Starvation | 3   | daGal4 | 3.1  | ♂   | 4                | 40  | 15.3 | 20               | 40   | 18.5 | 27               | 40         | 16.5 | 20               | 0.0         | 0.0              |                   |
| Starvation | 3   | daGal4 | 3.1  | ♂   | 5                | 40  | 23.0 | 30               | 40   | 23.1 | 30               | 40         | 24.2 | 30               | 4.8         | 0.0              | 0.0856            |
| Starvation | 3   | daGal4 | 3.1  | ♂   | 6                | 40  | 22.7 | 26               | 40   | 24.3 | 34               | 40         | 22.4 | 26               | -1.3        | 0.0              | <b>0.0040</b>     |
| Starvation | 3   | daGal4 | 4.4  | ♀   | 1                | 40  | 64.8 | 84               | 40   | 62.8 | 84               | 39         | 67.5 | 84               | 4.1         | 0.0              | 0.1475            |
| Starvation | 3   | daGal4 | 4.4  | ♀   | 2                | 40  | 30.3 | 32               | 39   | 29.0 | 41               | 40         | 32.3 | 41               | 6.5         | 0.0              | 0.0642            |

Table S2

| Stress     | Age | Gal4   | UAS  | Sex | Rep <sup>1</sup> | UAS |      |                  | Gal4 |      |                  | Gal4 + UAS |      |                  | % Extension |                  | P                 |
|------------|-----|--------|------|-----|------------------|-----|------|------------------|------|------|------------------|------------|------|------------------|-------------|------------------|-------------------|
|            |     |        |      |     |                  | n   | Mean | Max <sup>2</sup> | n    | Mean | Max <sup>2</sup> | n          | Mean | Max <sup>2</sup> | Mean        | Max <sup>2</sup> |                   |
| Starvation | 3   | daGal4 | 4.4  | ♀   | 3                | 40  | 29.9 | 34               | 40   | 29.7 | 38               | 41         | 32.6 | 42               | 9.1         | 10.5             | <b>0.0032</b>     |
| Starvation | 3   | daGal4 | 4.4  | ♀   | 4                | 40  | 30.9 | 32               | 38   | 30.1 | 41               | 41         | 41.0 | 48               | 33.0        | 17.1             | <b>&lt;0.0001</b> |
| Starvation | 3   | daGal4 | 4.4  | ♀   | 5                | 41  | 34.7 | 42               | 40   | 32.5 | 42               | 40         | 34.8 | 42               | 0.3         | 0.0              | 0.1886            |
| Starvation | 3   | daGal4 | 4.4  | ♀   | 6                | 40  | 34.7 | 42               | 41   | 32.0 | 38               | 40         | 35.7 | 42               | 2.9         | 0.0              | <b>0.0012</b>     |
| Starvation | 3   | daGal4 | 4.4  | ♂   | 1                | 40  | 47.5 | 59               | 40   | 49.7 | 59               | 37         | 51.9 | 72               | 4.4         | 22.0             | <b>0.0443</b>     |
| Starvation | 3   | daGal4 | 4.4  | ♂   | 2                | 40  | 15.4 | 23               | 39   | 14.4 | 23               | 44         | 15.2 | 23               | 0.0         | 0.0              |                   |
| Starvation | 3   | daGal4 | 4.4  | ♂   | 3                | 40  | 21.8 | 26               | 40   | 21.9 | 26               | 40         | 22.6 | 30               | 3.2         | 15.4             | 0.0908            |
| Starvation | 3   | daGal4 | 4.4  | ♂   | 4                | 40  | 15.5 | 23               | 38   | 14.4 | 23               | 41         | 21.0 | 32               | 35.3        | 39.1             | <b>&lt;0.0001</b> |
| Starvation | 3   | daGal4 | 4.4  | ♂   | 5                | 40  | 23.1 | 30               | 40   | 23.1 | 30               | 39         | 25.2 | 30               | 9.0         | 0.0              | <b>0.0053</b>     |
| Starvation | 3   | daGal4 | 4.4  | ♂   | 6                | 41  | 23.3 | 26               | 40   | 24.3 | 34               | 40         | 26.1 | 34               | 7.4         | 0.0              | <b>0.0010</b>     |
| Starvation | 3   | DJ694  | 2.1  | ♀   | 1                | 40  | 44.3 | 63               | 40   | 34.6 | 40               | 40         | 36.4 | 45               | 0.0         | 0.0              |                   |
| Starvation | 3   | DJ694  | 2.1  | ♀   | 2                | 40  | 54.3 | 73               | 40   | 54.9 | 68               | 40         | 52.9 | 63               | -2.5        | -7.4             | 0.1174            |
| Starvation | 3   | DJ694  | 2.1  | ♀   | 3                | 40  | 28.7 | 40               | 40   | 24.8 | 32               | 40         | 27.5 | 32               | 0.0         | 0.0              |                   |
| Starvation | 3   | DJ694  | 2.1  | ♀   | 4                | 41  | 26.0 | 34               | 41   | 25.6 | 34               | 40         | 22.6 | 34               | -11.9       | 0.0              | <b>0.0019</b>     |
| Starvation | 3   | DJ694  | 2.1  | ♀   | 5                | 40  | 29.0 | 40               | 40   | 22.5 | 32               | 40         | 27.2 | 40               | 0.0         | 0.0              |                   |
| Starvation | 3   | DJ694  | 2.1  | ♀   | 6                | 40  | 26.4 | 34               | 42   | 28.0 | 38               | 42         | 26.4 | 34               | 0.0         | 0.0              |                   |
| Starvation | 3   | DJ694  | 2.1  | ♀   | 7                | 28  | 27.6 | 34               | 40   | 29.1 | 34               | 40         | 27.0 | 34               | -2.2        | 0.0              | 0.0515            |
| Starvation | 3   | DJ694  | 2.1  | ♂   | 1                | 40  | 30.2 | 45               | 40   | 24.0 | 35               | 40         | 29.6 | 45               | 0.0         | 0.0              |                   |
| Starvation | 3   | DJ694  | 2.1  | ♂   | 2                | 40  | 37.9 | 53               | 39   | 34.0 | 43               | 39         | 33.5 | 43               | -1.5        | 0.0              | <b>0.0004</b>     |
| Starvation | 3   | DJ694  | 2.1  | ♂   | 3                | 40  | 17.0 | 20               | 40   | 16.7 | 20               | 40         | 15.9 | 20               | -4.9        | 0.0              | 0.3501            |
| Starvation | 3   | DJ694  | 2.1  | ♂   | 4                | 40  | 20.8 | 34               | 40   | 18.5 | 26               | 39         | 16.8 | 22               | -9.0        | -15.4            | <b>0.0254</b>     |
| Starvation | 3   | DJ694  | 2.1  | ♂   | 5                | 40  | 17.1 | 20               | 40   | 15.6 | 27               | 40         | 17.1 | 20               | 0.0         | 0.0              |                   |
| Starvation | 3   | DJ694  | 2.1  | ♂   | 6                | 40  | 20.8 | 34               | 41   | 18.9 | 22               | 38         | 16.0 | 22               | -15.4       | 0.0              | <b>0.0001</b>     |
| Starvation | 3   | DJ694  | 2.1  | ♂   | 7                | 39  | 20.1 | 34               | 40   | 17.9 | 22               | 37         | 17.6 | 22               | -1.4        | 0.0              | <b>0.0189</b>     |
| Starvation | 3   | DJ694  | 4.3  | ♀   | 1                | 40  | 25.7 | 34               | 41   | 25.6 | 34               | 39         | 23.1 | 34               | -9.8        | 0.0              | <b>0.0118</b>     |
| Starvation | 3   | DJ694  | 4.3  | ♀   | 2                | 42  | 25.7 | 34               | 42   | 28.0 | 38               | 40         | 22.0 | 26               | -14.5       | -23.5            | <b>0.0001</b>     |
| Starvation | 3   | DJ694  | 4.3  | ♀   | 3                | 40  | 28.1 | 34               | 40   | 29.1 | 34               | 40         | 24.7 | 34               | -12.1       | 0.0              | <b>0.0041</b>     |
| Starvation | 3   | DJ694  | 4.3  | ♂   | 1                | 39  | 18.6 | 26               | 40   | 18.5 | 26               | 41         | 15.0 | 22               | -18.7       | -15.4            | <b>&lt;0.0001</b> |
| Starvation | 3   | DJ694  | 4.3  | ♂   | 2                | 40  | 19.2 | 26               | 41   | 18.9 | 22               | 40         | 15.2 | 22               | -19.5       | 0.0              | <b>&lt;0.0001</b> |
| Starvation | 3   | DJ694  | 4.3  | ♂   | 3                | 41  | 18.6 | 26               | 40   | 17.9 | 22               | 37         | 16.1 | 22               | -10.1       | 0.0              | <b>0.0041</b>     |
| Starvation | 3   | DJ694  | 9.1  | ♀   | 1                | 41  | 30.7 | 41               | 39   | 30.0 | 32               | 40         | 31.4 | 32               | 2.3         | 0.0              | <b>0.0437</b>     |
| Starvation | 3   | DJ694  | 9.1  | ♀   | 2                | 40  | 27.9 | 34               | 41   | 25.6 | 34               | 39         | 27.1 | 34               | 0.0         | 0.0              |                   |
| Starvation | 3   | DJ694  | 9.1  | ♀   | 3                | 40  | 30.9 | 32               | 40   | 27.6 | 32               | 40         | 32.0 | 41               | 3.6         | 28.1             | 0.1301            |
| Starvation | 3   | DJ694  | 9.1  | ♀   | 4                | 49  | 27.8 | 34               | 42   | 28.0 | 38               | 40         | 23.1 | 34               | -16.9       | 0.0              | <b>&lt;0.0001</b> |
| Starvation | 3   | DJ694  | 9.1  | ♀   | 5                | 41  | 29.1 | 34               | 40   | 29.1 | 34               | 40         | 24.1 | 34               | -17.2       | 0.0              | <b>&lt;0.0001</b> |
| Starvation | 3   | DJ694  | 9.1  | ♂   | 1                | 40  | 13.8 | 16               | 39   | 14.3 | 23               | 40         | 13.4 | 16               | -2.7        | 0.0              | 0.1750            |
| Starvation | 3   | DJ694  | 9.1  | ♂   | 2                | 40  | 18.9 | 26               | 40   | 18.5 | 26               | 40         | 14.3 | 22               | -22.4       | -15.4            | <b>&lt;0.0001</b> |
| Starvation | 3   | DJ694  | 9.1  | ♂   | 3                | 40  | 15.0 | 23               | 38   | 13.6 | 16               | 40         | 14.1 | 23               | 0.0         | 0.0              |                   |
| Starvation | 3   | DJ694  | 9.1  | ♂   | 4                | 50  | 20.0 | 34               | 41   | 18.9 | 22               | 41         | 14.6 | 18               | -22.6       | -18.2            | <b>&lt;0.0001</b> |
| Starvation | 3   | DJ694  | 9.1  | ♂   | 5                | 40  | 19.3 | 26               | 40   | 17.9 | 22               | 37         | 14.2 | 18               | -20.5       | -18.2            | <b>&lt;0.0001</b> |
| Starvation | 3   | DJ694  | 3.2  | ♀   | 1                | 35  | 34.0 | 52               | 40   | 51.9 | 62               | 40         | 42.0 | 57               | 0.0         | 0.0              |                   |
| Starvation | 3   | DJ694  | 3.2  | ♀   | 2                | 39  | 26.5 | 34               | 41   | 25.6 | 34               | 41         | 28.1 | 34               | 6.3         | 0.0              | <b>0.0265</b>     |
| Starvation | 3   | DJ694  | 3.2  | ♀   | 3                | 39  | 30.1 | 38               | 42   | 28.0 | 38               | 40         | 28.9 | 38               | 0.0         | 0.0              |                   |
| Starvation | 3   | DJ694  | 3.2  | ♀   | 4                | 37  | 27.8 | 38               | 40   | 29.1 | 34               | 37         | 26.9 | 38               | -3.5        | 0.0              | 0.0638            |
| Starvation | 3   | DJ694  | 3.2  | ♂   | 1                | 40  | 27.7 | 37               | 40   | 31.1 | 42               | 40         | 30.0 | 37               | 0.0         | 0.0              |                   |
| Starvation | 3   | DJ694  | 3.2  | ♂   | 2                | 36  | 21.3 | 34               | 40   | 18.5 | 26               | 39         | 18.2 | 34               | -1.5        | 0.0              | <b>0.0349</b>     |
| Starvation | 3   | DJ694  | 3.2  | ♂   | 3                | 40  | 21.4 | 34               | 41   | 18.9 | 22               | 41         | 17.7 | 34               | -6.2        | 0.0              | <b>0.0153</b>     |
| Starvation | 3   | DJ694  | 3.2  | ♂   | 4                | 40  | 21.2 | 34               | 40   | 17.9 | 22               | 41         | 16.9 | 26               | -5.4        | 0.0              | <b>0.0026</b>     |
| Starvation | 3   | DJ694  | 10.1 | ♀   | 1                | 40  | 68.7 | 84               | 37   | 49.9 | 72               | 40         | 63.7 | 84               | 0.0         | 0.0              |                   |

Table S2

| Stress     | Age | Gal4  | UAS  | Sex | Rep <sup>1</sup> | UAS |      |                  | Gal4 |      |                  | Gal4 + UAS |      |                  | % Extension |                  | P                 |
|------------|-----|-------|------|-----|------------------|-----|------|------------------|------|------|------------------|------------|------|------------------|-------------|------------------|-------------------|
|            |     |       |      |     |                  | n   | Mean | Max <sup>2</sup> | n    | Mean | Max <sup>2</sup> | n          | Mean | Max <sup>2</sup> | Mean        | Max <sup>2</sup> |                   |
| Starvation | 3   | DJ694 | 10.1 | ♀   | 2                | 40  | 30.5 | 41               | 39   | 30.0 | 32               | 40         | 30.7 | 41               | 0.7         | 0.0              | 0.4364            |
| Starvation | 3   | DJ694 | 10.1 | ♀   | 3                | 39  | 27.7 | 34               | 41   | 25.6 | 34               | 41         | 30.1 | 38               | 8.6         | 11.8             | <b>0.0002</b>     |
| Starvation | 3   | DJ694 | 10.1 | ♀   | 4                | 35  | 29.2 | 34               | 42   | 28.0 | 38               | 20         | 27.2 | 34               | -2.9        | 0.0              | 0.0906            |
| Starvation | 3   | DJ694 | 10.1 | ♀   | 5                | 25  | 30.6 | 38               | 40   | 29.1 | 34               | 39         | 26.2 | 38               | -10.1       | 0.0              | <b>0.0090</b>     |
| Starvation | 3   | DJ694 | 10.1 | ♂   | 1                | 40  | 54.9 | 84               | 40   | 36.9 | 47               | 40         | 48.7 | 72               | 0.0         | 0.0              |                   |
| Starvation | 3   | DJ694 | 10.1 | ♂   | 2                | 40  | 18.0 | 23               | 39   | 14.3 | 23               | 40         | 15.0 | 16               | 0.0         | -30.4            |                   |
| Starvation | 3   | DJ694 | 10.1 | ♂   | 3                | 37  | 21.4 | 34               | 40   | 18.5 | 26               | 42         | 23.5 | 34               | 9.9         | 0.0              | 0.0610            |
| Starvation | 3   | DJ694 | 10.1 | ♂   | 4                | 41  | 20.0 | 34               | 41   | 18.9 | 22               | 40         | 20.7 | 26               | 3.2         | 0.0              | <b>0.0134</b>     |
| Starvation | 3   | DJ694 | 10.1 | ♂   | 5                | 41  | 23.3 | 34               | 40   | 17.9 | 22               | 42         | 22.2 | 34               | 0.0         | 0.0              |                   |
| Starvation | 3   | DJ694 | 3.1  | ♀   | 1                | 40  | 32.2 | 51               | 40   | 34.6 | 40               | 40         | 32.0 | 57               | -0.8        | 11.8             | 0.2482            |
| Starvation | 3   | DJ694 | 3.1  | ♀   | 2                | 40  | 43.8 | 54               | 40   | 43.1 | 50               | 40         | 40.1 | 46               | -7.0        | -8.0             | <b>0.0004</b>     |
| Starvation | 3   | DJ694 | 3.1  | ♀   | 3                | 40  | 26.7 | 32               | 40   | 24.8 | 32               | 40         | 24.6 | 32               | -0.8        | 0.0              | <b>0.0166</b>     |
| Starvation | 3   | DJ694 | 3.1  | ♀   | 4                | 39  | 30.4 | 34               | 41   | 25.6 | 34               | 35         | 23.5 | 34               | -8.2        | 0.0              | <b>0.0226</b>     |
| Starvation | 3   | DJ694 | 3.1  | ♀   | 5                | 40  | 23.4 | 32               | 40   | 22.5 | 32               | 40         | 22.9 | 27               | 0.0         | -15.6            |                   |
| Starvation | 3   | DJ694 | 3.1  | ♀   | 6                | 44  | 31.2 | 38               | 42   | 28.0 | 38               | 40         | 23.3 | 26               | -16.8       | -31.6            | <b>&lt;0.0001</b> |
| Starvation | 3   | DJ694 | 3.1  | ♀   | 7                | 39  | 29.6 | 34               | 40   | 29.1 | 34               | 38         | 25.8 | 34               | -11.5       | 0.0              | <b>0.0009</b>     |
| Starvation | 3   | DJ694 | 3.1  | ♂   | 1                | 40  | 26.8 | 45               | 40   | 24.0 | 35               | 40         | 20.3 | 30               | -15.2       | -14.3            | <b>0.0025</b>     |
| Starvation | 3   | DJ694 | 3.1  | ♂   | 2                | 40  | 28.8 | 38               | 40   | 29.0 | 38               | 40         | 25.4 | 34               | -11.7       | -10.5            | <b>0.0008</b>     |
| Starvation | 3   | DJ694 | 3.1  | ♂   | 3                | 40  | 15.9 | 20               | 40   | 16.7 | 20               | 40         | 15.4 | 20               | -3.5        | 0.0              | 0.1466            |
| Starvation | 3   | DJ694 | 3.1  | ♂   | 4                | 40  | 19.3 | 22               | 40   | 18.5 | 26               | 37         | 16.8 | 22               | -8.7        | 0.0              | <b>0.0002</b>     |
| Starvation | 3   | DJ694 | 3.1  | ♂   | 5                | 40  | 15.3 | 20               | 40   | 15.6 | 27               | 40         | 14.4 | 17               | -6.0        | -15.0            | <b>0.0377</b>     |
| Starvation | 3   | DJ694 | 3.1  | ♂   | 6                | 42  | 19.4 | 22               | 41   | 18.9 | 22               | 40         | 18.3 | 26               | -2.9        | 18.2             | 0.1782            |
| Starvation | 3   | DJ694 | 3.1  | ♂   | 7                | 40  | 19.3 | 26               | 40   | 17.9 | 22               | 41         | 17.3 | 22               | -2.8        | 0.0              | <b>0.0056</b>     |
| Starvation | 3   | DJ694 | 4.4  | ♀   | 1                | 40  | 35.8 | 43               | 40   | 29.6 | 34               | 40         | 32.1 | 43               | 0.0         | 0.0              |                   |
| Starvation | 3   | DJ694 | 4.4  | ♀   | 2                | 40  | 64.8 | 84               | 40   | 61.6 | 84               | 40         | 53.9 | 72               | -12.5       | -14.3            | <b>0.0009</b>     |
| Starvation | 3   | DJ694 | 4.4  | ♀   | 3                | 40  | 30.3 | 32               | 39   | 30.0 | 32               | 40         | 31.8 | 41               | 4.9         | 28.1             | <b>0.0388</b>     |
| Starvation | 3   | DJ694 | 4.4  | ♀   | 4                | 39  | 27.5 | 34               | 41   | 25.6 | 34               | 41         | 22.6 | 34               | -11.7       | 0.0              | <b>0.0019</b>     |
| Starvation | 3   | DJ694 | 4.4  | ♀   | 5                | 40  | 30.9 | 32               | 40   | 27.6 | 32               | 39         | 30.4 | 32               | 0.0         | 0.0              |                   |
| Starvation | 3   | DJ694 | 4.4  | ♀   | 6                | 48  | 30.0 | 34               | 42   | 28.0 | 38               | 41         | 24.1 | 34               | -13.8       | 0.0              | <b>0.0003</b>     |
| Starvation | 3   | DJ694 | 4.4  | ♀   | 7                | 38  | 29.9 | 34               | 40   | 29.1 | 34               | 37         | 24.8 | 34               | -14.8       | 0.0              | <b>0.0002</b>     |
| Starvation | 3   | DJ694 | 4.4  | ♂   | 1                | 40  | 21.3 | 24               | 40   | 26.4 | 29               | 40         | 20.3 | 29               | -4.8        | 0.0              | 0.0786            |
| Starvation | 3   | DJ694 | 4.4  | ♂   | 2                | 40  | 47.5 | 59               | 40   | 44.1 | 59               | 40         | 40.4 | 46               | -8.3        | -22.0            | <b>0.0001</b>     |
| Starvation | 3   | DJ694 | 4.4  | ♂   | 3                | 40  | 15.4 | 23               | 39   | 14.3 | 23               | 40         | 13.7 | 23               | -4.1        | 0.0              | <b>0.0145</b>     |
| Starvation | 3   | DJ694 | 4.4  | ♂   | 4                | 39  | 18.9 | 26               | 40   | 18.5 | 26               | 40         | 15.8 | 22               | -14.4       | -15.4            | <b>0.0010</b>     |
| Starvation | 3   | DJ694 | 4.4  | ♂   | 5                | 40  | 15.5 | 23               | 38   | 13.6 | 16               | 40         | 14.2 | 23               | 0.0         | 0.0              |                   |
| Starvation | 3   | DJ694 | 4.4  | ♂   | 6                | 39  | 17.5 | 22               | 41   | 18.9 | 22               | 42         | 16.0 | 26               | -8.8        | 18.2             | <b>0.0004</b>     |
| Starvation | 3   | DJ694 | 4.4  | ♂   | 7                | 39  | 18.9 | 26               | 40   | 17.9 | 22               | 40         | 14.3 | 22               | -19.7       | 0.0              | <b>&lt;0.0001</b> |
| Starvation | 3   | D42   | 2.1  | ♀   | 1                | 40  | 44.3 | 63               | 40   | 38.0 | 45               | 40         | 32.0 | 51               | -15.7       | 0.0              | <b>0.0002</b>     |
| Starvation | 3   | D42   | 2.1  | ♀   | 2                | 40  | 54.3 | 73               | 40   | 53.1 | 63               | 50         | 55.7 | 63               | 2.7         | 0.0              | 0.2767            |
| Starvation | 3   | D42   | 2.1  | ♀   | 3                | 40  | 28.7 | 40               | 40   | 24.9 | 32               | 40         | 33.9 | 40               | 18.2        | 0.0              | <b>0.0053</b>     |
| Starvation | 3   | D42   | 2.1  | ♀   | 4                | 40  | 36.3 | 46               | 40   | 39.0 | 50               | 42         | 37.1 | 46               | 0.0         | 0.0              |                   |
| Starvation | 3   | D42   | 2.1  | ♀   | 5                | 40  | 29.0 | 40               | 40   | 22.5 | 32               | 40         | 33.8 | 40               | 16.8        | 0.0              | <b>0.0008</b>     |
| Starvation | 3   | D42   | 2.1  | ♀   | 6                | 40  | 37.0 | 42               | 40   | 39.9 | 50               | 40         | 38.3 | 46               | 0.0         | 0.0              |                   |
| Starvation | 3   | D42   | 2.1  | ♀   | 7                | 40  | 36.7 | 42               | 42   | 39.5 | 50               | 40         | 40.1 | 50               | 1.5         | 0.0              | <b>0.0005</b>     |
| Starvation | 3   | D42   | 2.1  | ♂   | 1                | 40  | 30.2 | 45               | 40   | 27.6 | 35               | 40         | 26.5 | 35               | -4.1        | 0.0              | <b>0.0014</b>     |
| Starvation | 3   | D42   | 2.1  | ♂   | 2                | 40  | 37.9 | 53               | 40   | 36.4 | 48               | 40         | 36.6 | 48               | 0.0         | 0.0              |                   |
| Starvation | 3   | D42   | 2.1  | ♂   | 3                | 40  | 17.0 | 20               | 40   | 17.1 | 20               | 40         | 18.2 | 20               | 6.3         | 0.0              | <b>0.0011</b>     |
| Starvation | 3   | D42   | 2.1  | ♂   | 4                | 40  | 26.7 | 34               | 40   | 27.7 | 42               | 40         | 28.3 | 38               | 2.2         | 0.0              | 0.0840            |
| Starvation | 3   | D42   | 2.1  | ♂   | 5                | 40  | 17.1 | 20               | 40   | 14.0 | 17               | 40         | 18.9 | 20               | 10.4        | 0.0              | <b>&lt;0.0001</b> |

Table S2

| Stress     | Age | Gal4 | UAS  | Sex | Rep <sup>1</sup> | UAS |      |                  | Gal4 |      |                  | Gal4 + UAS |      |                  | % Extension |                  | P                 |
|------------|-----|------|------|-----|------------------|-----|------|------------------|------|------|------------------|------------|------|------------------|-------------|------------------|-------------------|
|            |     |      |      |     |                  | n   | Mean | Max <sup>2</sup> | n    | Mean | Max <sup>2</sup> | n          | Mean | Max <sup>2</sup> | Mean        | Max <sup>2</sup> |                   |
| Starvation | 3   | D42  | 2.1  | ♂   | 6                | 40  | 28.9 | 38               | 40   | 27.9 | 38               | 40         | 27.7 | 34               | -0.7        | -10.5            | 0.3159            |
| Starvation | 3   | D42  | 2.1  | ♂   | 7                | 40  | 26.7 | 34               | 40   | 28.3 | 38               | 40         | 26.4 | 38               | -1.1        | 0.0              | 0.1402            |
| Starvation | 3   | D42  | 4.3  | ♀   | 1                | 40  | 36.1 | 42               | 40   | 39.0 | 50               | 40         | 39.2 | 46               | 0.5         | 0.0              | <b>0.0005</b>     |
| Starvation | 3   | D42  | 4.3  | ♀   | 2                | 40  | 37.8 | 46               | 40   | 39.9 | 50               | 40         | 38.6 | 46               | 0.0         | 0.0              |                   |
| Starvation | 3   | D42  | 4.3  | ♀   | 3                | 43  | 36.0 | 42               | 42   | 39.5 | 50               | 40         | 38.0 | 46               | 0.0         | 0.0              |                   |
| Starvation | 3   | D42  | 4.3  | ♂   | 1                | 40  | 30.2 | 42               | 40   | 27.7 | 42               | 40         | 28.4 | 34               | 0.0         | -19.0            |                   |
| Starvation | 3   | D42  | 4.3  | ♂   | 2                | 41  | 28.0 | 34               | 40   | 27.9 | 38               | 40         | 28.2 | 34               | 0.9         | 0.0              | 0.6510            |
| Starvation | 3   | D42  | 4.3  | ♂   | 3                | 40  | 27.1 | 38               | 40   | 28.3 | 38               | 40         | 23.8 | 30               | -12.2       | -21.1            | <b>0.0002</b>     |
| Starvation | 3   | D42  | 9.1  | ♀   | 1                | 41  | 30.7 | 41               | 40   | 31.8 | 41               | 43         | 32.2 | 41               | 1.2         | 0.0              | 0.0692            |
| Starvation | 3   | D42  | 9.1  | ♀   | 2                | 40  | 38.0 | 42               | 40   | 39.0 | 50               | 40         | 36.0 | 46               | -5.3        | 0.0              | <b>0.0165</b>     |
| Starvation | 3   | D42  | 9.1  | ♀   | 3                | 40  | 30.9 | 32               | 38   | 30.3 | 41               | 41         | 31.0 | 32               | 0.6         | 0.0              | 0.3354            |
| Starvation | 3   | D42  | 9.1  | ♀   | 4                | 42  | 39.4 | 46               | 40   | 39.9 | 50               | 40         | 34.9 | 42               | -11.5       | -8.7             | <b>&lt;0.0001</b> |
| Starvation | 3   | D42  | 9.1  | ♀   | 5                | 40  | 39.2 | 50               | 42   | 39.5 | 50               | 40         | 38.3 | 42               | -2.3        | -16.0            | 0.1892            |
| Starvation | 3   | D42  | 9.1  | ♂   | 1                | 40  | 13.8 | 16               | 40   | 12.8 | 16               | 44         | 14.1 | 23               | 2.8         | 43.8             | 0.0564            |
| Starvation | 3   | D42  | 9.1  | ♂   | 2                | 40  | 29.8 | 42               | 40   | 27.7 | 42               | 40         | 24.9 | 34               | -10.1       | -19.0            | <b>0.0109</b>     |
| Starvation | 3   | D42  | 9.1  | ♂   | 3                | 40  | 15.0 | 23               | 40   | 13.3 | 16               | 43         | 13.7 | 16               | 0.0         | 0.0              |                   |
| Starvation | 3   | D42  | 9.1  | ♂   | 4                | 40  | 27.1 | 38               | 40   | 27.9 | 38               | 40         | 24.5 | 34               | -9.6        | -10.5            | <b>0.0047</b>     |
| Starvation | 3   | D42  | 9.1  | ♂   | 5                | 40  | 28.6 | 42               | 40   | 28.3 | 38               | 40         | 23.5 | 30               | -17.0       | -21.1            | <b>&lt;0.0001</b> |
| Starvation | 3   | D42  | 3.2  | ♀   | 1                | 35  | 34.0 | 52               | 42   | 51.5 | 67               | 40         | 51.4 | 62               | 0.0         | 0.0              |                   |
| Starvation | 3   | D42  | 3.2  | ♀   | 2                | 40  | 40.5 | 50               | 40   | 39.0 | 50               | 40         | 41.5 | 50               | 2.5         | 0.0              | <b>0.0279</b>     |
| Starvation | 3   | D42  | 3.2  | ♀   | 3                | 40  | 41.1 | 50               | 40   | 39.9 | 50               | 40         | 41.0 | 50               | 0.0         | 0.0              |                   |
| Starvation | 3   | D42  | 3.2  | ♀   | 4                | 40  | 41.3 | 50               | 42   | 39.5 | 50               | 40         | 42.1 | 50               | 1.9         | 0.0              | 0.1144            |
| Starvation | 3   | D42  | 3.2  | ♂   | 1                | 40  | 27.7 | 37               | 40   | 31.1 | 37               | 40         | 31.9 | 47               | 2.4         | 27.0             | <b>0.0137</b>     |
| Starvation | 3   | D42  | 3.2  | ♂   | 2                | 40  | 28.9 | 38               | 40   | 27.7 | 42               | 40         | 29.1 | 38               | 0.7         | 0.0              | 0.3563            |
| Starvation | 3   | D42  | 3.2  | ♂   | 3                | 40  | 30.3 | 42               | 40   | 27.9 | 38               | 40         | 28.6 | 38               | 0.0         | 0.0              |                   |
| Starvation | 3   | D42  | 3.2  | ♂   | 4                | 40  | 33.2 | 42               | 40   | 28.3 | 38               | 40         | 29.2 | 38               | 0.0         | 0.0              |                   |
| Starvation | 3   | D42  | 10.1 | ♀   | 1                | 40  | 68.7 | 84               | 40   | 54.0 | 84               | 40         | 72.7 | 96               | 5.8         | 14.3             | 0.1433            |
| Starvation | 3   | D42  | 10.1 | ♀   | 2                | 40  | 30.5 | 41               | 40   | 31.8 | 41               | 39         | 34.5 | 41               | 8.4         | 0.0              | <b>0.0035</b>     |
| Starvation | 3   | D42  | 10.1 | ♀   | 3                | 40  | 41.8 | 46               | 40   | 39.0 | 50               | 40         | 39.2 | 46               | 0.0         | 0.0              |                   |
| Starvation | 3   | D42  | 10.1 | ♀   | 4                | 39  | 45.5 | 59               | 40   | 39.9 | 50               | 40         | 40.6 | 46               | 0.0         | -8.0             |                   |
| Starvation | 3   | D42  | 10.1 | ♀   | 5                | 40  | 42.5 | 50               | 42   | 39.5 | 50               | 41         | 41.4 | 50               | 0.0         | 0.0              |                   |
| Starvation | 3   | D42  | 10.1 | ♂   | 1                | 40  | 54.9 | 84               | 40   | 46.2 | 59               | 40         | 53.7 | 72               | 0.0         | 0.0              |                   |
| Starvation | 3   | D42  | 10.1 | ♂   | 2                | 40  | 18.0 | 23               | 40   | 12.8 | 16               | 40         | 17.4 | 23               | 0.0         | 0.0              |                   |
| Starvation | 3   | D42  | 10.1 | ♂   | 3                | 40  | 31.7 | 42               | 40   | 27.7 | 42               | 40         | 33.1 | 42               | 4.4         | 0.0              | <b>0.0002</b>     |
| Starvation | 3   | D42  | 10.1 | ♂   | 4                | 41  | 33.6 | 42               | 40   | 27.9 | 38               | 42         | 34.7 | 42               | 3.1         | 0.0              | 0.4653            |
| Starvation | 3   | D42  | 10.1 | ♂   | 5                | 40  | 30.5 | 38               | 40   | 28.3 | 38               | 40         | 34.5 | 42               | 13.1        | 10.5             | <b>0.0005</b>     |
| Starvation | 3   | D42  | 3.1  | ♀   | 1                | 40  | 32.2 | 51               | 40   | 38.0 | 45               | 40         | 36.5 | 57               | 0.0         | 11.8             | 0.0982            |
| Starvation | 3   | D42  | 3.1  | ♀   | 2                | 40  | 43.8 | 54               | 37   | 41.1 | 50               | 40         | 44.7 | 54               | 2.1         | 0.0              | <b>0.0012</b>     |
| Starvation | 3   | D42  | 3.1  | ♀   | 3                | 40  | 26.7 | 32               | 40   | 24.9 | 32               | 40         | 29.2 | 40               | 9.4         | 25.0             | <b>0.0003</b>     |
| Starvation | 3   | D42  | 3.1  | ♀   | 4                | 40  | 36.8 | 42               | 40   | 39.0 | 50               | 42         | 37.1 | 46               | 0.0         | 0.0              |                   |
| Starvation | 3   | D42  | 3.1  | ♀   | 5                | 40  | 23.4 | 32               | 40   | 22.5 | 32               | 40         | 29.2 | 32               | 24.6        | 0.0              | <b>&lt;0.0001</b> |
| Starvation | 3   | D42  | 3.1  | ♀   | 6                | 40  | 38.4 | 46               | 40   | 39.9 | 50               | 42         | 37.2 | 46               | -3.0        | 0.0              | <b>0.0213</b>     |
| Starvation | 3   | D42  | 3.1  | ♀   | 7                | 40  | 37.7 | 46               | 42   | 39.5 | 50               | 40         | 37.5 | 42               | -0.5        | -8.7             | 0.0568            |
| Starvation | 3   | D42  | 3.1  | ♂   | 1                | 40  | 26.8 | 45               | 40   | 27.6 | 35               | 40         | 25.9 | 35               | -3.5        | 0.0              | 0.0850            |
| Starvation | 3   | D42  | 3.1  | ♂   | 2                | 40  | 28.8 | 38               | 40   | 25.0 | 34               | 40         | 27.3 | 31               | 0.0         | -8.8             |                   |
| Starvation | 3   | D42  | 3.1  | ♂   | 3                | 40  | 15.9 | 20               | 40   | 17.1 | 20               | 40         | 18.7 | 27               | 8.9         | 35.0             | <b>0.0001</b>     |
| Starvation | 3   | D42  | 3.1  | ♂   | 4                | 40  | 24.7 | 34               | 40   | 27.7 | 42               | 40         | 26.9 | 34               | 0.0         | 0.0              |                   |
| Starvation | 3   | D42  | 3.1  | ♂   | 5                | 40  | 15.3 | 20               | 40   | 14.0 | 17               | 40         | 18.5 | 27               | 20.8        | 35.0             | <b>&lt;0.0001</b> |
| Starvation | 3   | D42  | 3.1  | ♂   | 6                | 40  | 25.9 | 34               | 40   | 27.9 | 38               | 40         | 26.8 | 34               | 0.0         | 0.0              |                   |

Table S2

| Stress     | Age | Gal4   | UAS | Sex | Rep <sup>1</sup> | UAS |      |                  | Gal4 |      |                  | Gal4 + UAS |      |                  | % Extension |                  | P                 |
|------------|-----|--------|-----|-----|------------------|-----|------|------------------|------|------|------------------|------------|------|------------------|-------------|------------------|-------------------|
|            |     |        |     |     |                  | n   | Mean | Max <sup>2</sup> | n    | Mean | Max <sup>2</sup> | n          | Mean | Max <sup>2</sup> | Mean        | Max <sup>2</sup> |                   |
| Starvation | 3   | D42    | 3.1 | ♂   | 7                | 40  | 27.0 | 34               | 40   | 28.3 | 38               | 40         | 25.6 | 34               | -5.2        | 0.0              | <b>0.0147</b>     |
| Starvation | 3   | D42    | 4.4 | ♀   | 1                | 40  | 35.8 | 43               | 40   | 29.7 | 34               | 40         | 31.3 | 34               | 0.0         | 0.0              |                   |
| Starvation | 3   | D42    | 4.4 | ♀   | 2                | 40  | 64.8 | 84               | 39   | 72.6 | 84               | 40         | 68.8 | 84               | 0.0         | 0.0              |                   |
| Starvation | 3   | D42    | 4.4 | ♀   | 3                | 40  | 30.3 | 32               | 40   | 31.8 | 41               | 42         | 33.9 | 48               | 6.6         | 17.1             | <b>0.0015</b>     |
| Starvation | 3   | D42    | 4.4 | ♀   | 4                | 40  | 39.5 | 50               | 40   | 39.0 | 50               | 40         | 37.4 | 42               | -4.1        | -16.0            | 0.1325            |
| Starvation | 3   | D42    | 4.4 | ♀   | 5                | 40  | 30.9 | 32               | 38   | 30.3 | 41               | 41         | 39.2 | 41               | 26.9        | 0.0              | <b>&lt;0.0001</b> |
| Starvation | 3   | D42    | 4.4 | ♀   | 6                | 40  | 41.4 | 46               | 40   | 39.9 | 50               | 40         | 36.1 | 42               | -9.5        | -8.7             | <b>0.0015</b>     |
| Starvation | 3   | D42    | 4.4 | ♀   | 7                | 40  | 39.2 | 50               | 42   | 39.5 | 50               | 40         | 34.4 | 42               | -12.2       | -16.0            | <b>&lt;0.0001</b> |
| Starvation | 3   | D42    | 4.4 | ♂   | 1                | 40  | 21.3 | 24               | 40   | 22.4 | 29               | 40         | 23.5 | 29               | 5.0         | 0.0              | <b>0.0033</b>     |
| Starvation | 3   | D42    | 4.4 | ♂   | 2                | 40  | 47.5 | 59               | 34   | 44.5 | 59               | 40         | 47.2 | 72               | 0.0         | 22.0             |                   |
| Starvation | 3   | D42    | 4.4 | ♂   | 3                | 40  | 15.4 | 23               | 40   | 12.8 | 16               | 40         | 15.8 | 23               | 2.6         | 0.0              | 0.6505            |
| Starvation | 3   | D42    | 4.4 | ♂   | 4                | 40  | 27.0 | 38               | 40   | 27.7 | 42               | 40         | 27.8 | 34               | 0.4         | -10.5            | 0.4817            |
| Starvation | 3   | D42    | 4.4 | ♂   | 5                | 40  | 15.5 | 23               | 40   | 13.3 | 16               | 41         | 22.7 | 32               | 46.2        | 39.1             | <b>&lt;0.0001</b> |
| Starvation | 3   | D42    | 4.4 | ♂   | 6                | 40  | 27.9 | 38               | 40   | 27.9 | 38               | 40         | 26.5 | 38               | -5.0        | 0.0              | 0.3560            |
| Starvation | 3   | D42    | 4.4 | ♂   | 7                | 40  | 27.6 | 34               | 40   | 28.3 | 38               | 40         | 25.5 | 38               | -7.6        | 0.0              | <b>0.0402</b>     |
| Starvation | 10  | daGal4 | 2.1 | ♀   | 1                | 40  | 49.5 | 63               | 40   | 48.8 | 63               | 40         | 46.2 | 58               | -5.4        | -7.9             | <b>0.0208</b>     |
| Starvation | 10  | daGal4 | 2.1 | ♀   | 2                | 40  | 31.0 | 38               | 40   | 33.3 | 38               | 41         | 29.2 | 38               | -5.7        | 0.0              | 0.0995            |
| Starvation | 10  | daGal4 | 2.1 | ♀   | 3                | 40  | 29.3 | 34               | 41   | 36.3 | 42               | 43         | 31.2 | 38               | 0.0         | 0.0              |                   |
| Starvation | 10  | daGal4 | 2.1 | ♀   | 4                | 40  | 30.2 | 34               | 40   | 35.5 | 42               | 40         | 31.2 | 38               | 0.0         | 0.0              |                   |
| Starvation | 10  | daGal4 | 2.1 | ♂   | 1                | 39  | 27.9 | 38               | 36   | 28.3 | 33               | 40         | 27.5 | 38               | -1.8        | 0.0              | 0.4315            |
| Starvation | 10  | daGal4 | 2.1 | ♂   | 2                | 41  | 15.7 | 18               | 38   | 16.5 | 18               | 40         | 15.8 | 22               | 0.0         | 22.2             |                   |
| Starvation | 10  | daGal4 | 2.1 | ♂   | 3                | 40  | 17.9 | 22               | 39   | 17.3 | 18               | 40         | 16.3 | 18               | -5.7        | 0.0              | <b>0.0012</b>     |
| Starvation | 10  | daGal4 | 2.1 | ♂   | 4                | 40  | 16.7 | 18               | 39   | 17.6 | 22               | 40         | 16.0 | 22               | -4.2        | 0.0              | <b>0.0114</b>     |
| Starvation | 10  | daGal4 | 4.3 | ♀   | 1                | 40  | 48.6 | 59               | 38   | 51.1 | 72               | 40         | 60.8 | 84               | 18.9        | 16.7             | <b>0.0001</b>     |
| Starvation | 10  | daGal4 | 4.3 | ♀   | 2                | 40  | 29.6 | 38               | 40   | 25.5 | 38               | 40         | 27.8 | 48               | 0.0         | 26.3             |                   |
| Starvation | 10  | daGal4 | 4.3 | ♀   | 3                | 40  | 30.7 | 38               | 40   | 33.3 | 38               | 40         | 33.5 | 38               | 0.6         | 0.0              | <b>0.0489</b>     |
| Starvation | 10  | daGal4 | 4.3 | ♀   | 4                | 40  | 32.6 | 43               | 40   | 24.8 | 33               | 40         | 29.2 | 48               | 0.0         | 11.6             |                   |
| Starvation | 10  | daGal4 | 4.3 | ♀   | 5                | 40  | 30.0 | 38               | 41   | 36.3 | 42               | 40         | 35.1 | 42               | 0.0         | 0.0              |                   |
| Starvation | 10  | daGal4 | 4.3 | ♀   | 6                | 39  | 31.5 | 38               | 40   | 35.5 | 42               | 40         | 35.9 | 46               | 1.1         | 9.5              | <b>0.0002</b>     |
| Starvation | 10  | daGal4 | 4.3 | ♂   | 1                | 37  | 26.6 | 34               | 40   | 23.6 | 34               | 40         | 34.3 | 47               | 28.9        | 38.2             | <b>&lt;0.0001</b> |
| Starvation | 10  | daGal4 | 4.3 | ♂   | 2                | 40  | 11.6 | 16               | 40   | 10.4 | 16               | 40         | 13.9 | 33               | 19.6        | 106.3            | <b>0.0147</b>     |
| Starvation | 10  | daGal4 | 4.3 | ♂   | 3                | 40  | 17.3 | 22               | 38   | 16.5 | 18               | 41         | 17.1 | 18               | 0.0         | 0.0              |                   |
| Starvation | 10  | daGal4 | 4.3 | ♂   | 4                | 40  | 17.2 | 18               | 39   | 17.3 | 18               | 39         | 17.7 | 22               | 2.4         | 22.2             | 0.5355            |
| Starvation | 10  | daGal4 | 4.3 | ♂   | 5                | 39  | 16.1 | 18               | 39   | 17.6 | 22               | 39         | 17.6 | 22               | 0.0         | 0.0              |                   |
| Starvation | 10  | daGal4 | 9.1 | ♀   | 1                | 39  | 32.7 | 40               | 39   | 25.6 | 40               | 39         | 27.3 | 40               | 0.0         | 0.0              |                   |
| Starvation | 10  | daGal4 | 9.1 | ♀   | 2                | 39  | 31.6 | 38               | 40   | 33.3 | 38               | 40         | 30.8 | 38               | -2.7        | 0.0              | <b>0.0004</b>     |
| Starvation | 10  | daGal4 | 9.1 | ♀   | 3                | 40  | 31.3 | 40               | 40   | 26.6 | 40               | 34         | 22.7 | 40               | -14.6       | 0.0              | <b>0.0176</b>     |
| Starvation | 10  | daGal4 | 9.1 | ♀   | 4                | 40  | 33.3 | 42               | 41   | 36.3 | 42               | 40         | 30.2 | 38               | -9.3        | -9.5             | <b>0.0003</b>     |
| Starvation | 10  | daGal4 | 9.1 | ♀   | 5                | 40  | 34.2 | 42               | 40   | 35.5 | 42               | 40         | 29.1 | 34               | -14.9       | -19.0            | <b>&lt;0.0001</b> |
| Starvation | 10  | daGal4 | 9.1 | ♂   | 1                | 39  | 11.3 | 15               | 39   | 11.2 | 15               | 37         | 10.1 | 10               | -9.3        | -33.3            | <b>0.0087</b>     |
| Starvation | 10  | daGal4 | 9.1 | ♂   | 2                | 40  | 16.4 | 18               | 38   | 16.5 | 18               | 40         | 16.0 | 18               | -2.4        | 0.0              | 0.3321            |
| Starvation | 10  | daGal4 | 9.1 | ♂   | 3                | 40  | 11.8 | 15               | 39   | 10.9 | 15               | 40         | 10.0 | 10               | -8.2        | -33.3            | <b>0.0053</b>     |
| Starvation | 10  | daGal4 | 9.1 | ♂   | 4                | 40  | 15.5 | 18               | 39   | 17.3 | 18               | 40         | 14.7 | 18               | -5.2        | 0.0              | <b>0.0465</b>     |
| Starvation | 10  | daGal4 | 9.1 | ♂   | 5                | 40  | 16.0 | 18               | 39   | 17.6 | 22               | 39         | 15.1 | 18               | -5.4        | 0.0              | 0.1044            |
| Starvation | 10  | daGal4 | 3.2 | ♀   | 1                | 35  | 39.2 | 48               | 40   | 47.3 | 63               | 40         | 46.5 | 63               | 0.0         | 0.0              |                   |
| Starvation | 10  | daGal4 | 3.2 | ♀   | 2                | 40  | 28.8 | 33               | 40   | 25.5 | 38               | 40         | 30.1 | 43               | 4.4         | 13.2             | <b>0.0038</b>     |
| Starvation | 10  | daGal4 | 3.2 | ♀   | 3                | 40  | 32.8 | 38               | 40   | 33.3 | 38               | 39         | 33.6 | 38               | 0.9         | 0.0              | 0.1294            |
| Starvation | 10  | daGal4 | 3.2 | ♀   | 4                | 40  | 24.7 | 33               | 40   | 24.8 | 33               | 40         | 29.4 | 38               | 18.9        | 15.2             | <b>0.0005</b>     |
| Starvation | 10  | daGal4 | 3.2 | ♀   | 5                | 40  | 34.2 | 42               | 41   | 36.3 | 42               | 40         | 34.0 | 42               | -0.6        | 0.0              | <b>0.0463</b>     |

Table S2

| Stress     | Age | Gal4   | UAS  | Sex | Rep <sup>1</sup> | UAS |      |                  | Gal4 |      |                  | Gal4 + UAS |      |                  | % Extension |                  | P             |
|------------|-----|--------|------|-----|------------------|-----|------|------------------|------|------|------------------|------------|------|------------------|-------------|------------------|---------------|
|            |     |        |      |     |                  | n   | Mean | Max <sup>2</sup> | n    | Mean | Max <sup>2</sup> | n          | Mean | Max <sup>2</sup> | Mean        | Max <sup>2</sup> |               |
| Starvation | 10  | daGal4 | 3.2  | ♀   | 6                | 40  | 33.9 | 42               | 40   | 35.5 | 42               | 40         | 36.3 | 46               | 2.3         | 9.5              | <b>0.0197</b> |
| Starvation | 10  | daGal4 | 3.2  | ♂   | 1                | 40  | 20.9 | 29               | 40   | 24.9 | 33               | 40         | 28.8 | 38               | 15.8        | 15.2             | <b>0.0013</b> |
| Starvation | 10  | daGal4 | 3.2  | ♂   | 2                | 40  | 11.7 | 16               | 40   | 10.4 | 16               | 40         | 11.3 | 20               | 0.0         | 25.0             |               |
| Starvation | 10  | daGal4 | 3.2  | ♂   | 3                | 40  | 19.6 | 26               | 38   | 16.5 | 18               | 40         | 19.1 | 26               | 0.0         | 0.0              |               |
| Starvation | 10  | daGal4 | 3.2  | ♂   | 4                | 40  | 13.1 | 20               | 40   | 10.7 | 16               | 40         | 14.1 | 25               | 8.0         | 25.0             | <b>0.0015</b> |
| Starvation | 10  | daGal4 | 3.2  | ♂   | 5                | 40  | 18.7 | 22               | 39   | 17.3 | 18               | 39         | 19.7 | 26               | 5.6         | 18.2             | 0.0764        |
| Starvation | 10  | daGal4 | 3.2  | ♂   | 6                | 40  | 19.1 | 22               | 39   | 17.6 | 22               | 40         | 21.4 | 34               | 12.0        | 54.5             | <b>0.0322</b> |
| Starvation | 10  | daGal4 | 10.1 | ♀   | 1                | 36  | 26.9 | 47               | 34   | 25.1 | 33               | 40         | 31.5 | 47               | 16.9        | 0.0              | <b>0.0005</b> |
| Starvation | 10  | daGal4 | 10.1 | ♀   | 2                | 40  | 33.6 | 40               | 39   | 25.6 | 40               | 40         | 25.6 | 40               | 0.0         | 0.0              |               |
| Starvation | 10  | daGal4 | 10.1 | ♀   | 3                | 44  | 35.2 | 42               | 40   | 33.3 | 38               | 40         | 34.7 | 42               | 0.0         | 0.0              |               |
| Starvation | 10  | daGal4 | 10.1 | ♀   | 4                | 39  | 28.2 | 40               | 40   | 26.6 | 40               | 32         | 22.6 | 40               | -15.2       | 0.0              | <b>0.0049</b> |
| Starvation | 10  | daGal4 | 10.1 | ♀   | 5                | 40  | 35.1 | 42               | 41   | 36.3 | 42               | 40         | 36.3 | 42               | 0.0         | 0.0              |               |
| Starvation | 10  | daGal4 | 10.1 | ♀   | 6                | 40  | 36.0 | 42               | 40   | 35.5 | 42               | 40         | 36.9 | 42               | 2.5         | 0.0              | 0.1098        |
| Starvation | 10  | daGal4 | 10.1 | ♂   | 1                | 36  | 19.8 | 22               | 36   | 21.6 | 22               | 39         | 24.6 | 33               | 13.9        | 50.0             | <b>0.0004</b> |
| Starvation | 10  | daGal4 | 10.1 | ♂   | 2                | 40  | 11.6 | 15               | 39   | 11.2 | 15               | 40         | 13.7 | 21               | 17.4        | 40.0             | <b>0.0014</b> |
| Starvation | 10  | daGal4 | 10.1 | ♂   | 3                | 40  | 19.1 | 22               | 38   | 16.5 | 18               | 43         | 19.9 | 26               | 4.0         | 18.2             | 0.1526        |
| Starvation | 10  | daGal4 | 10.1 | ♂   | 4                | 40  | 13.3 | 21               | 39   | 10.9 | 15               | 39         | 10.3 | 15               | -5.9        | 0.0              | 0.0783        |
| Starvation | 10  | daGal4 | 10.1 | ♂   | 5                | 40  | 18.7 | 26               | 39   | 17.3 | 18               | 42         | 20.2 | 30               | 8.0         | 15.4             | 0.0615        |
| Starvation | 10  | daGal4 | 10.1 | ♂   | 6                | 37  | 18.4 | 22               | 39   | 17.6 | 22               | 40         | 20.3 | 26               | 10.1        | 18.2             | <b>0.0170</b> |
| Starvation | 10  | daGal4 | 3.1  | ♀   | 1                | 37  | 32.7 | 46               | 33   | 34.7 | 46               | 40         | 35.9 | 54               | 3.4         | 17.4             | 0.0574        |
| Starvation | 10  | daGal4 | 3.1  | ♀   | 2                | 40  | 30.5 | 38               | 40   | 33.3 | 38               | 40         | 31.3 | 38               | 0.0         | 0.0              |               |
| Starvation | 10  | daGal4 | 3.1  | ♀   | 3                | 40  | 31.4 | 38               | 41   | 36.3 | 42               | 40         | 34.4 | 42               | 0.0         | 0.0              |               |
| Starvation | 10  | daGal4 | 3.1  | ♀   | 4                | 40  | 34.3 | 46               | 40   | 35.5 | 42               | 39         | 33.4 | 42               | -2.7        | 0.0              | <b>0.0087</b> |
| Starvation | 10  | daGal4 | 3.1  | ♂   | 1                | 40  | 18.6 | 26               | 40   | 18.5 | 30               | 40         | 21.4 | 30               | 15.1        | 0.0              | <b>0.0082</b> |
| Starvation | 10  | daGal4 | 3.1  | ♂   | 2                | 41  | 18.1 | 22               | 38   | 16.5 | 18               | 40         | 18.5 | 22               | 2.2         | 0.0              | 0.2871        |
| Starvation | 10  | daGal4 | 3.1  | ♂   | 3                | 40  | 16.5 | 22               | 39   | 17.3 | 18               | 41         | 18.3 | 26               | 5.8         | 18.2             | <b>0.0031</b> |
| Starvation | 10  | daGal4 | 3.1  | ♂   | 4                | 40  | 16.6 | 22               | 39   | 17.6 | 22               | 38         | 16.7 | 18               | 0.0         | -18.2            |               |
| Starvation | 10  | daGal4 | 4.4  | ♀   | 1                | 40  | 30.5 | 40               | 39   | 25.6 | 40               | 36         | 24.9 | 40               | -2.5        | 0.0              | <b>0.0005</b> |
| Starvation | 10  | daGal4 | 4.4  | ♀   | 2                | 36  | 53.6 | 59               | 38   | 51.1 | 72               | 39         | 54.5 | 72               | 1.6         | 0.0              | 0.1343        |
| Starvation | 10  | daGal4 | 4.4  | ♀   | 3                | 40  | 34.1 | 38               | 40   | 33.3 | 38               | 41         | 32.1 | 42               | -3.5        | 10.5             | 0.0820        |
| Starvation | 10  | daGal4 | 4.4  | ♀   | 4                | 41  | 32.9 | 40               | 40   | 26.6 | 40               | 40         | 25.4 | 40               | -4.5        | 0.0              | 0.3065        |
| Starvation | 10  | daGal4 | 4.4  | ♀   | 5                | 40  | 34.7 | 42               | 41   | 36.3 | 42               | 31         | 35.8 | 46               | 0.0         | 9.5              |               |
| Starvation | 10  | daGal4 | 4.4  | ♀   | 6                | 40  | 36.5 | 42               | 40   | 35.5 | 42               | 37         | 35.0 | 42               | -1.5        | 0.0              | 0.2074        |
| Starvation | 10  | daGal4 | 4.4  | ♂   | 1                | 40  | 11.6 | 15               | 39   | 11.2 | 15               | 42         | 10.4 | 15               | -7.4        | 0.0              | <b>0.0040</b> |
| Starvation | 10  | daGal4 | 4.4  | ♂   | 2                | 37  | 27.2 | 34               | 40   | 23.6 | 34               | 40         | 30.7 | 47               | 12.8        | 38.2             | <b>0.0286</b> |
| Starvation | 10  | daGal4 | 4.4  | ♂   | 3                | 40  | 16.7 | 18               | 38   | 16.5 | 18               | 39         | 17.2 | 22               | 2.9         | 22.2             | 0.1972        |
| Starvation | 10  | daGal4 | 4.4  | ♂   | 4                | 40  | 12.4 | 15               | 39   | 10.9 | 15               | 40         | 13.2 | 21               | 6.5         | 40.0             | <b>0.0004</b> |
| Starvation | 10  | daGal4 | 4.4  | ♂   | 5                | 40  | 17.1 | 22               | 39   | 17.3 | 18               | 39         | 17.3 | 22               | 0.0         | 0.0              |               |
| Starvation | 10  | daGal4 | 4.4  | ♂   | 6                | 41  | 16.0 | 18               | 39   | 17.6 | 22               | 39         | 18.9 | 26               | 7.6         | 18.2             | <b>0.0228</b> |
| Starvation | 10  | DJ694  | 2.1  | ♀   | 1                | 40  | 49.5 | 63               | 40   | 49.0 | 58               | 40         | 47.5 | 58               | -3.1        | 0.0              | <b>0.0256</b> |
| Starvation | 10  | DJ694  | 2.1  | ♀   | 2                | 40  | 23.9 | 30               | 40   | 22.4 | 26               | 40         | 20.5 | 22               | -8.5        | -15.4            | <b>0.0009</b> |
| Starvation | 10  | DJ694  | 2.1  | ♀   | 3                | 40  | 23.8 | 30               | 41   | 24.7 | 30               | 40         | 22.9 | 26               | -3.8        | -13.3            | <b>0.0008</b> |
| Starvation | 10  | DJ694  | 2.1  | ♀   | 4                | 40  | 23.5 | 30               | 40   | 26.0 | 30               | 49         | 24.2 | 30               | 0.0         | 0.0              |               |
| Starvation | 10  | DJ694  | 2.1  | ♂   | 1                | 39  | 27.9 | 38               | 38   | 26.9 | 33               | 39         | 27.3 | 33               | 0.0         | 0.0              |               |
| Starvation | 10  | DJ694  | 2.1  | ♂   | 2                | 40  | 15.3 | 18               | 40   | 11.8 | 14               | 40         | 12.1 | 14               | 0.0         | 0.0              |               |
| Starvation | 10  | DJ694  | 2.1  | ♂   | 3                | 40  | 14.3 | 18               | 40   | 15.7 | 18               | 40         | 13.3 | 18               | -7.0        | 0.0              | <b>0.0199</b> |
| Starvation | 10  | DJ694  | 2.1  | ♂   | 4                | 40  | 14.5 | 18               | 40   | 12.9 | 14               | 40         | 13.6 | 18               | 0.0         | 0.0              |               |
| Starvation | 10  | DJ694  | 4.3  | ♀   | 1                | 40  | 48.6 | 59               | 38   | 50.3 | 72               | 40         | 52.8 | 72               | 4.9         | 0.0              | 0.4071        |
| Starvation | 10  | DJ694  | 4.3  | ♀   | 2                | 40  | 29.6 | 38               | 40   | 20.6 | 33               | 40         | 25.1 | 33               | 0.0         | 0.0              |               |

Table S2

| Stress     | Age | Gal4  | UAS  | Sex | Rep <sup>1</sup> | UAS |      |                  | Gal4 |      |                  | Gal4 + UAS |      |                  | % Extension |                  | P                 |
|------------|-----|-------|------|-----|------------------|-----|------|------------------|------|------|------------------|------------|------|------------------|-------------|------------------|-------------------|
|            |     |       |      |     |                  | n   | Mean | Max <sup>2</sup> | n    | Mean | Max <sup>2</sup> | n          | Mean | Max <sup>2</sup> | Mean        | Max <sup>2</sup> |                   |
| Starvation | 10  | DJ694 | 4.3  | ♀   | 3                | 38  | 24.4 | 30               | 40   | 22.4 | 26               | 40         | 20.0 | 22               | -10.7       | -15.4            | <b>&lt;0.0001</b> |
| Starvation | 10  | DJ694 | 4.3  | ♀   | 4                | 40  | 32.6 | 43               | 40   | 21.6 | 33               | 40         | 23.1 | 33               | 0.0         | 0.0              |                   |
| Starvation | 10  | DJ694 | 4.3  | ♀   | 5                | 40  | 25.0 | 30               | 41   | 24.7 | 30               | 30         | 21.3 | 22               | -13.7       | -26.7            | <b>&lt;0.0001</b> |
| Starvation | 10  | DJ694 | 4.3  | ♀   | 6                | 40  | 26.7 | 34               | 40   | 26.0 | 30               | 40         | 22.5 | 26               | -13.5       | -13.3            | <b>&lt;0.0001</b> |
| Starvation | 10  | DJ694 | 4.3  | ♂   | 1                | 37  | 26.6 | 34               | 40   | 25.9 | 34               | 40         | 25.6 | 34               | -1.1        | 0.0              | 0.4436            |
| Starvation | 10  | DJ694 | 4.3  | ♂   | 2                | 40  | 11.6 | 16               | 40   | 11.0 | 16               | 40         | 10.0 | 20               | -8.7        | 25.0             | 0.0795            |
| Starvation | 10  | DJ694 | 4.3  | ♂   | 3                | 40  | 16.4 | 18               | 40   | 11.8 | 14               | 40         | 13.7 | 14               | 0.0         | 0.0              |                   |
| Starvation | 10  | DJ694 | 4.3  | ♂   | 4                | 40  | 10.5 | 16               | 40   | 9.4  | 16               | 40         | 9.5  | 16               | 0.0         | 0.0              |                   |
| Starvation | 10  | DJ694 | 4.3  | ♂   | 5                | 40  | 16.1 | 18               | 40   | 15.7 | 18               | 40         | 14.1 | 18               | -10.2       | 0.0              | <b>0.0003</b>     |
| Starvation | 10  | DJ694 | 4.3  | ♂   | 6                | 40  | 15.0 | 18               | 40   | 12.9 | 14               | 40         | 13.4 | 14               | 0.0         | 0.0              |                   |
| Starvation | 10  | DJ694 | 9.1  | ♀   | 1                | 39  | 32.7 | 40               | 39   | 26.3 | 40               | 40         | 24.8 | 40               | -5.8        | 0.0              | 0.1103            |
| Starvation | 10  | DJ694 | 9.1  | ♀   | 2                | 39  | 26.3 | 30               | 40   | 22.4 | 26               | 40         | 19.9 | 22               | -11.2       | -15.4            | <b>&lt;0.0001</b> |
| Starvation | 10  | DJ694 | 9.1  | ♀   | 3                | 40  | 31.3 | 40               | 40   | 23.0 | 27               | 41         | 24.0 | 40               | 0.0         | 0.0              |                   |
| Starvation | 10  | DJ694 | 9.1  | ♀   | 4                | 40  | 27.0 | 34               | 41   | 24.7 | 30               | 40         | 20.6 | 22               | -16.7       | -26.7            | <b>&lt;0.0001</b> |
| Starvation | 10  | DJ694 | 9.1  | ♀   | 5                | 40  | 27.6 | 30               | 40   | 26.0 | 30               | 40         | 19.3 | 26               | -25.8       | -13.3            | <b>&lt;0.0001</b> |
| Starvation | 10  | DJ694 | 9.1  | ♂   | 1                | 39  | 11.3 | 15               | 38   | 10.0 | 10               | 39         | 10.0 | 10               | 0.0         | 0.0              |                   |
| Starvation | 10  | DJ694 | 9.1  | ♂   | 2                | 40  | 16.2 | 18               | 40   | 11.8 | 14               | 40         | 10.9 | 14               | -7.6        | 0.0              | <b>0.0345</b>     |
| Starvation | 10  | DJ694 | 9.1  | ♂   | 3                | 40  | 11.8 | 15               | 40   | 10.6 | 15               | 40         | 10.1 | 10               | -4.7        | -33.3            | <b>0.0004</b>     |
| Starvation | 10  | DJ694 | 9.1  | ♂   | 4                | 40  | 15.9 | 18               | 40   | 15.7 | 18               | 40         | 13.1 | 14               | -16.6       | -22.2            | <b>&lt;0.0001</b> |
| Starvation | 10  | DJ694 | 9.1  | ♂   | 5                | 40  | 16.7 | 18               | 40   | 12.9 | 14               | 40         | 12.1 | 14               | -6.2        | 0.0              | 0.0805            |
| Starvation | 10  | DJ694 | 3.2  | ♀   | 1                | 35  | 39.2 | 48               | 38   | 44.4 | 53               | 40         | 47.0 | 53               | 5.9         | 0.0              | 0.3138            |
| Starvation | 10  | DJ694 | 3.2  | ♀   | 2                | 40  | 28.8 | 33               | 40   | 20.6 | 33               | 40         | 25.9 | 33               | 0.0         | 0.0              |                   |
| Starvation | 10  | DJ694 | 3.2  | ♀   | 3                | 40  | 26.4 | 34               | 40   | 22.4 | 26               | 40         | 23.6 | 34               | 0.0         | 0.0              |                   |
| Starvation | 10  | DJ694 | 3.2  | ♀   | 4                | 40  | 24.7 | 33               | 40   | 21.6 | 33               | 40         | 25.4 | 33               | 2.8         | 0.0              | <b>0.0147</b>     |
| Starvation | 10  | DJ694 | 3.2  | ♀   | 5                | 40  | 26.1 | 30               | 41   | 24.7 | 30               | 40         | 24.7 | 30               | 0.0         | 0.0              |                   |
| Starvation | 10  | DJ694 | 3.2  | ♀   | 6                | 40  | 27.6 | 30               | 40   | 26.0 | 30               | 40         | 25.9 | 38               | -0.4        | 26.7             | 0.1205            |
| Starvation | 10  | DJ694 | 3.2  | ♂   | 1                | 40  | 20.9 | 29               | 36   | 19.6 | 29               | 40         | 24.1 | 38               | 15.3        | 31.0             | <b>0.0015</b>     |
| Starvation | 10  | DJ694 | 3.2  | ♂   | 2                | 40  | 11.7 | 16               | 40   | 11.0 | 16               | 40         | 11.1 | 25               | 0.0         | 56.3             |                   |
| Starvation | 10  | DJ694 | 3.2  | ♂   | 3                | 40  | 18.5 | 22               | 40   | 11.8 | 14               | 40         | 16.5 | 18               | 0.0         | 0.0              |                   |
| Starvation | 10  | DJ694 | 3.2  | ♂   | 4                | 40  | 13.1 | 20               | 40   | 9.4  | 16               | 40         | 10.8 | 20               | 0.0         | 0.0              |                   |
| Starvation | 10  | DJ694 | 3.2  | ♂   | 5                | 40  | 18.1 | 22               | 40   | 15.7 | 18               | 40         | 17.0 | 22               | 0.0         | 0.0              |                   |
| Starvation | 10  | DJ694 | 3.2  | ♂   | 6                | 40  | 19.3 | 22               | 40   | 12.9 | 14               | 40         | 16.5 | 22               | 0.0         | 0.0              |                   |
| Starvation | 10  | DJ694 | 10.1 | ♀   | 1                | 36  | 26.9 | 47               | 32   | 26.3 | 47               | 40         | 29.3 | 47               | 8.7         | 0.0              | 0.0586            |
| Starvation | 10  | DJ694 | 10.1 | ♀   | 2                | 40  | 33.6 | 40               | 39   | 26.3 | 40               | 40         | 23.4 | 27               | -11.1       | -32.5            | <b>0.0032</b>     |
| Starvation | 10  | DJ694 | 10.1 | ♀   | 3                | 40  | 24.5 | 30               | 40   | 22.4 | 26               | 40         | 22.3 | 26               | -0.4        | 0.0              | <b>0.0017</b>     |
| Starvation | 10  | DJ694 | 10.1 | ♀   | 4                | 39  | 28.2 | 40               | 40   | 23.0 | 27               | 40         | 21.5 | 27               | -6.6        | 0.0              | 0.0272            |
| Starvation | 10  | DJ694 | 10.1 | ♀   | 5                | 40  | 27.6 | 38               | 41   | 24.7 | 30               | 39         | 24.6 | 30               | -0.7        | 0.0              | 0.7832            |
| Starvation | 10  | DJ694 | 10.1 | ♀   | 6                | 40  | 27.1 | 34               | 40   | 26.0 | 30               | 40         | 24.0 | 30               | -7.7        | 0.0              | <b>0.0002</b>     |
| Starvation | 10  | DJ694 | 10.1 | ♂   | 1                | 36  | 19.8 | 22               | 32   | 20.4 | 22               | 38         | 22.7 | 29               | 11.6        | 31.8             | <b>0.0015</b>     |
| Starvation | 10  | DJ694 | 10.1 | ♂   | 2                | 40  | 11.6 | 15               | 38   | 10.0 | 10               | 40         | 10.0 | 10               | 0.0         | 0.0              |                   |
| Starvation | 10  | DJ694 | 10.1 | ♂   | 3                | 40  | 17.5 | 22               | 40   | 11.8 | 14               | 40         | 15.1 | 18               | 0.0         | 0.0              |                   |
| Starvation | 10  | DJ694 | 10.1 | ♂   | 4                | 40  | 13.3 | 21               | 40   | 10.6 | 15               | 40         | 11.8 | 21               | 0.0         | 0.0              |                   |
| Starvation | 10  | DJ694 | 10.1 | ♂   | 5                | 40  | 18.8 | 22               | 40   | 15.7 | 18               | 40         | 17.1 | 18               | 0.0         | 0.0              |                   |
| Starvation | 10  | DJ694 | 10.1 | ♂   | 6                | 40  | 18.5 | 22               | 40   | 12.9 | 14               | 40         | 17.5 | 22               | 0.0         | 0.0              |                   |
| Starvation | 10  | DJ694 | 3.1  | ♀   | 1                | 37  | 32.7 | 46               | 40   | 41.1 | 54               | 39         | 34.2 | 50               | 0.0         | 0.0              |                   |
| Starvation | 10  | DJ694 | 3.1  | ♀   | 2                | 40  | 21.7 | 26               | 40   | 22.4 | 26               | 40         | 22.8 | 30               | 1.8         | 15.4             | 0.0746            |
| Starvation | 10  | DJ694 | 3.1  | ♀   | 3                | 40  | 23.6 | 26               | 41   | 24.7 | 30               | 40         | 22.5 | 30               | -4.7        | 0.0              | <b>0.0004</b>     |
| Starvation | 10  | DJ694 | 3.1  | ♀   | 4                | 40  | 24.2 | 30               | 40   | 26.0 | 30               | 40         | 24.8 | 34               | 0.0         | 13.3             |                   |
| Starvation | 10  | DJ694 | 3.1  | ♂   | 1                | 40  | 18.6 | 26               | 40   | 18.2 | 26               | 40         | 16.0 | 22               | -12.2       | -15.4            | <b>0.0029</b>     |



Table S2

| Stress     | Age | Gal4  | UAS | Sex | Rep <sup>1</sup> | UAS |      |                  | Gal4 |      |                  | Gal4 + UAS |      |                  | % Extension |                  | P                 |
|------------|-----|-------|-----|-----|------------------|-----|------|------------------|------|------|------------------|------------|------|------------------|-------------|------------------|-------------------|
|            |     |       |     |     |                  | n   | Mean | Max <sup>2</sup> | n    | Mean | Max <sup>2</sup> | n          | Mean | Max <sup>2</sup> | Mean        | Max <sup>2</sup> |                   |
| Starvation | 10  | DJ694 | 3.1 | ♂   | 2                | 40  | 17.5 | 18               | 40   | 11.8 | 14               | 20         | 13.0 | 14               | 0.0         | 0.0              |                   |
| Starvation | 10  | DJ694 | 3.1 | ♂   | 3                | 40  | 17.6 | 18               | 40   | 15.7 | 18               | 40         | 15.7 | 18               | 0.0         | 0.0              |                   |
| Starvation | 10  | DJ694 | 3.1 | ♂   | 4                | 40  | 16.0 | 18               | 40   | 12.9 | 14               | 40         | 16.4 | 18               | 2.5         | 0.0              | 0.5390            |
| Starvation | 10  | DJ694 | 4.4 | ♀   | 1                | 40  | 29.8 | 35               | 40   | 24.8 | 35               | 40         | 21.8 | 30               | -12.1       | -14.3            | <b>0.0025</b>     |
| Starvation | 10  | DJ694 | 4.4 | ♀   | 2                | 40  | 30.5 | 40               | 39   | 26.3 | 40               | 39         | 22.4 | 27               | -15.0       | -32.5            | <b>0.0002</b>     |
| Starvation | 10  | DJ694 | 4.4 | ♀   | 3                | 36  | 53.6 | 59               | 38   | 50.3 | 72               | 40         | 54.8 | 72               | 2.1         | 0.0              | <b>0.0406</b>     |
| Starvation | 10  | DJ694 | 4.4 | ♀   | 4                | 40  | 23.9 | 26               | 40   | 22.4 | 26               | 40         | 23.1 | 30               | 0.0         | 15.4             |                   |
| Starvation | 10  | DJ694 | 4.4 | ♀   | 5                | 41  | 32.9 | 40               | 40   | 23.0 | 27               | 40         | 24.3 | 40               | 0.0         | 0.0              |                   |
| Starvation | 10  | DJ694 | 4.4 | ♀   | 6                | 40  | 25.9 | 30               | 41   | 24.7 | 30               | 40         | 25.5 | 30               | 0.0         | 0.0              |                   |
| Starvation | 10  | DJ694 | 4.4 | ♀   | 7                | 40  | 26.8 | 30               | 40   | 26.0 | 30               | 40         | 24.8 | 30               | -4.6        | 0.0              | 0.0578            |
| Starvation | 10  | DJ694 | 4.4 | ♂   | 1                | 40  | 19.5 | 25               | 40   | 19.8 | 25               | 40         | 18.6 | 25               | -4.5        | 0.0              | 0.1191            |
| Starvation | 10  | DJ694 | 4.4 | ♂   | 2                | 40  | 11.6 | 15               | 38   | 10.0 | 10               | 39         | 10.1 | 10               | 0.0         | 0.0              |                   |
| Starvation | 10  | DJ694 | 4.4 | ♂   | 3                | 37  | 27.2 | 34               | 40   | 25.9 | 34               | 38         | 24.4 | 34               | -5.8        | 0.0              | 0.0516            |
| Starvation | 10  | DJ694 | 4.4 | ♂   | 4                | 40  | 15.6 | 18               | 40   | 11.8 | 14               | 40         | 15.5 | 18               | 0.0         | 0.0              |                   |
| Starvation | 10  | DJ694 | 4.4 | ♂   | 5                | 40  | 12.4 | 15               | 40   | 10.6 | 15               | 40         | 10.3 | 15               | -3.5        | 0.0              | 0.2382            |
| Starvation | 10  | DJ694 | 4.4 | ♂   | 6                | 30  | 16.5 | 18               | 40   | 15.7 | 18               | 40         | 16.6 | 22               | 0.4         | 22.2             | 0.0956            |
| Starvation | 10  | DJ694 | 4.4 | ♂   | 7                | 40  | 16.2 | 18               | 40   | 12.9 | 14               | 40         | 14.3 | 18               | 0.0         | 0.0              |                   |
| Starvation | 10  | D42   | 2.1 | ♀   | 1                | 40  | 49.5 | 63               | 40   | 46.6 | 58               | 40         | 49.8 | 58               | 0.6         | 0.0              | 0.1613            |
| Starvation | 10  | D42   | 2.1 | ♀   | 2                | 40  | 25.8 | 32               | 40   | 25.1 | 32               | 39         | 25.3 | 28               | 0.0         | -12.5            |                   |
| Starvation | 10  | D42   | 2.1 | ♀   | 3                | 40  | 26.1 | 32               | 40   | 29.4 | 36               | 40         | 26.8 | 32               | 0.0         | 0.0              |                   |
| Starvation | 10  | D42   | 2.1 | ♀   | 4                | 40  | 27.5 | 32               | 40   | 29.8 | 36               | 40         | 29.4 | 32               | 0.0         | 0.0              |                   |
| Starvation | 10  | D42   | 2.1 | ♂   | 1                | 39  | 27.9 | 38               | 36   | 30.5 | 38               | 40         | 27.8 | 33               | -0.7        | -13.2            | <b>0.0013</b>     |
| Starvation | 10  | D42   | 2.1 | ♂   | 2                | 37  | 15.2 | 16               | 40   | 17.4 | 20               | 39         | 14.7 | 16               | -3.3        | 0.0              | 0.4107            |
| Starvation | 10  | D42   | 2.1 | ♂   | 3                | 40  | 16.5 | 24               | 39   | 15.7 | 20               | 40         | 14.8 | 16               | -5.9        | -20.0            | <b>0.0023</b>     |
| Starvation | 10  | D42   | 2.1 | ♂   | 4                | 40  | 15.6 | 16               | 40   | 16.9 | 20               | 40         | 15.8 | 16               | 0.0         | 0.0              |                   |
| Starvation | 10  | D42   | 4.3 | ♀   | 1                | 40  | 48.6 | 59               | 39   | 51.3 | 72               | 39         | 54.8 | 72               | 6.8         | 0.0              | <b>0.0457</b>     |
| Starvation | 10  | D42   | 4.3 | ♀   | 2                | 40  | 29.6 | 38               | 40   | 24.9 | 43               | 40         | 23.0 | 33               | -7.9        | -13.2            | 0.1441            |
| Starvation | 10  | D42   | 4.3 | ♀   | 3                | 40  | 27.1 | 32               | 40   | 25.1 | 32               | 38         | 25.7 | 32               | 0.0         | 0.0              |                   |
| Starvation | 10  | D42   | 4.3 | ♀   | 4                | 40  | 32.6 | 43               | 40   | 23.5 | 33               | 40         | 23.7 | 33               | 0.0         | 0.0              |                   |
| Starvation | 10  | D42   | 4.3 | ♀   | 5                | 40  | 28.8 | 32               | 40   | 29.4 | 36               | 40         | 29.2 | 32               | 0.0         | 0.0              |                   |
| Starvation | 10  | D42   | 4.3 | ♀   | 6                | 40  | 29.9 | 32               | 40   | 29.8 | 36               | 40         | 27.0 | 32               | -9.4        | 0.0              | <b>&lt;0.0001</b> |
| Starvation | 10  | D42   | 4.3 | ♂   | 1                | 37  | 26.6 | 34               | 36   | 25.5 | 34               | 40         | 24.1 | 34               | -5.5        | 0.0              | <b>0.0405</b>     |
| Starvation | 10  | D42   | 4.3 | ♂   | 2                | 40  | 11.6 | 16               | 40   | 9.9  | 16               | 40         | 7.9  | 16               | -19.5       | 0.0              | <b>0.0042</b>     |
| Starvation | 10  | D42   | 4.3 | ♂   | 3                | 40  | 14.5 | 16               | 40   | 17.4 | 20               | 39         | 14.3 | 16               | -1.8        | 0.0              | 0.6028            |
| Starvation | 10  | D42   | 4.3 | ♂   | 4                | 40  | 10.5 | 16               | 40   | 10.6 | 16               | 40         | 9.6  | 16               | -8.6        | 0.0              | 0.2443            |
| Starvation | 10  | D42   | 4.3 | ♂   | 5                | 39  | 15.2 | 16               | 39   | 15.7 | 20               | 40         | 13.6 | 16               | -10.4       | 0.0              | <b>0.0003</b>     |
| Starvation | 10  | D42   | 4.3 | ♂   | 6                | 40  | 14.8 | 16               | 40   | 16.9 | 20               | 40         | 13.7 | 20               | -7.8        | 0.0              | 0.1176            |
| Starvation | 10  | D42   | 9.1 | ♀   | 1                | 39  | 32.7 | 40               | 40   | 36.1 | 40               | 40         | 29.2 | 40               | -10.8       | 0.0              | <b>0.0299</b>     |
| Starvation | 10  | D42   | 9.1 | ♀   | 2                | 40  | 27.6 | 36               | 40   | 25.1 | 32               | 40         | 23.2 | 28               | -7.6        | -12.5            | <b>0.0058</b>     |
| Starvation | 10  | D42   | 9.1 | ♀   | 3                | 40  | 31.3 | 40               | 40   | 28.9 | 40               | 40         | 26.2 | 40               | -9.6        | 0.0              | <b>0.0033</b>     |
| Starvation | 10  | D42   | 9.1 | ♀   | 4                | 40  | 29.5 | 36               | 40   | 29.4 | 36               | 40         | 24.3 | 28               | -17.3       | -22.2            | <b>&lt;0.0001</b> |
| Starvation | 10  | D42   | 9.1 | ♀   | 5                | 40  | 30.4 | 36               | 40   | 29.8 | 36               | 38         | 25.3 | 32               | -15.2       | -11.1            | <b>&lt;0.0001</b> |
| Starvation | 10  | D42   | 9.1 | ♂   | 1                | 39  | 11.3 | 15               | 40   | 10.6 | 15               | 40         | 10.0 | 10               | -5.9        | -33.3            | <b>0.0013</b>     |
| Starvation | 10  | D42   | 9.1 | ♂   | 2                | 40  | 15.4 | 16               | 40   | 17.4 | 20               | 40         | 12.3 | 16               | -19.9       | 0.0              | <b>&lt;0.0001</b> |
| Starvation | 10  | D42   | 9.1 | ♂   | 3                | 40  | 11.8 | 15               | 40   | 11.9 | 21               | 40         | 10.5 | 15               | -10.8       | 0.0              | <b>0.0100</b>     |
| Starvation | 10  | D42   | 9.1 | ♂   | 4                | 40  | 14.8 | 16               | 39   | 15.7 | 20               | 38         | 13.5 | 16               | -8.5        | 0.0              | <b>0.0002</b>     |
| Starvation | 10  | D42   | 9.1 | ♂   | 5                | 40  | 15.4 | 16               | 40   | 16.9 | 20               | 40         | 16.0 | 16               | 0.0         | 0.0              |                   |
| Starvation | 10  | D42   | 3.2 | ♀   | 1                | 35  | 39.2 | 48               | 40   | 44.5 | 63               | 40         | 44.1 | 58               | 0.0         | 0.0              |                   |
| Starvation | 10  | D42   | 3.2 | ♀   | 2                | 40  | 28.8 | 33               | 40   | 24.9 | 43               | 40         | 31.9 | 38               | 10.7        | 0.0              | <b>0.0053</b>     |

| Stress     | Age | Gal4 | UAS  | Sex | Rep <sup>1</sup> | UAS |      |                  | Gal4 |      |                  | Gal4 + UAS |      |                  | % Extension |                  | P                 |
|------------|-----|------|------|-----|------------------|-----|------|------------------|------|------|------------------|------------|------|------------------|-------------|------------------|-------------------|
|            |     |      |      |     |                  | n   | Mean | Max <sup>2</sup> | n    | Mean | Max <sup>2</sup> | n          | Mean | Max <sup>2</sup> | Mean        | Max <sup>2</sup> |                   |
| Starvation | 10  | D42  | 3.2  | ♀   | 3                | 40  | 26.3 | 32               | 40   | 25.1 | 32               | 40         | 26.1 | 36               | 0.0         | 12.5             |                   |
| Starvation | 10  | D42  | 3.2  | ♀   | 4                | 40  | 24.7 | 33               | 40   | 23.5 | 33               | 40         | 30.1 | 38               | 21.8        | 15.2             | <b>0.0004</b>     |
| Starvation | 10  | D42  | 3.2  | ♀   | 5                | 40  | 26.7 | 32               | 40   | 29.4 | 36               | 40         | 26.9 | 32               | 0.0         | 0.0              |                   |
| Starvation | 10  | D42  | 3.2  | ♀   | 6                | 40  | 30.6 | 36               | 40   | 29.8 | 36               | 40         | 28.4 | 32               | -4.7        | -11.1            | <b>0.0026</b>     |
| Starvation | 10  | D42  | 3.2  | ♂   | 1                | 40  | 20.9 | 29               | 39   | 22.9 | 33               | 40         | 26.1 | 38               | 13.8        | 15.2             | <b>0.0487</b>     |
| Starvation | 10  | D42  | 3.2  | ♂   | 2                | 40  | 11.7 | 16               | 40   | 9.9  | 16               | 40         | 12.4 | 16               | 5.8         | 0.0              | <b>0.0006</b>     |
| Starvation | 10  | D42  | 3.2  | ♂   | 3                | 40  | 17.5 | 20               | 40   | 17.4 | 20               | 40         | 16.8 | 20               | -3.5        | 0.0              | 0.0887            |
| Starvation | 10  | D42  | 3.2  | ♂   | 4                | 40  | 13.1 | 20               | 40   | 10.6 | 16               | 40         | 11.7 | 16               | 0.0         | 0.0              |                   |
| Starvation | 10  | D42  | 3.2  | ♂   | 5                | 40  | 18.1 | 20               | 39   | 15.7 | 20               | 40         | 17.9 | 20               | 0.0         | 0.0              |                   |
| Starvation | 10  | D42  | 3.2  | ♂   | 6                | 39  | 19.6 | 24               | 40   | 16.9 | 20               | 40         | 20.2 | 24               | 3.1         | 0.0              | 0.2151            |
| Starvation | 10  | D42  | 10.1 | ♀   | 1                | 36  | 26.9 | 47               | 33   | 26.7 | 47               | 40         | 25.8 | 33               | -3.4        | -29.8            | 0.5199            |
| Starvation | 10  | D42  | 10.1 | ♀   | 2                | 40  | 33.6 | 40               | 40   | 36.1 | 40               | 40         | 27.4 | 40               | -18.3       | 0.0              | <b>0.0002</b>     |
| Starvation | 10  | D42  | 10.1 | ♀   | 3                | 39  | 24.0 | 32               | 40   | 25.1 | 32               | 40         | 25.8 | 32               | 2.8         | 0.0              | <b>0.0406</b>     |
| Starvation | 10  | D42  | 10.1 | ♀   | 4                | 39  | 28.2 | 40               | 40   | 28.9 | 40               | 40         | 23.0 | 27               | -18.6       | -32.5            | <b>&lt;0.0001</b> |
| Starvation | 10  | D42  | 10.1 | ♀   | 5                | 40  | 28.9 | 36               | 40   | 29.4 | 36               | 39         | 25.8 | 32               | -10.6       | -11.1            | <b>0.0004</b>     |
| Starvation | 10  | D42  | 10.1 | ♀   | 6                | 40  | 30.6 | 40               | 40   | 29.8 | 36               | 40         | 29.9 | 40               | 0.0         | 0.0              |                   |
| Starvation | 10  | D42  | 10.1 | ♂   | 1                | 36  | 19.8 | 22               | 39   | 21.0 | 22               | 39         | 24.5 | 33               | 16.5        | 50.0             | <b>&lt;0.0001</b> |
| Starvation | 10  | D42  | 10.1 | ♂   | 2                | 40  | 11.6 | 15               | 40   | 10.6 | 15               | 40         | 11.3 | 15               | 0.0         | 0.0              |                   |
| Starvation | 10  | D42  | 10.1 | ♂   | 3                | 40  | 18.5 | 24               | 40   | 17.4 | 20               | 40         | 19.9 | 24               | 7.6         | 0.0              | 0.0559            |
| Starvation | 10  | D42  | 10.1 | ♂   | 4                | 40  | 13.3 | 21               | 40   | 11.9 | 21               | 40         | 15.6 | 21               | 17.5        | 0.0              | <b>0.0031</b>     |
| Starvation | 10  | D42  | 10.1 | ♂   | 5                | 27  | 16.7 | 24               | 39   | 15.7 | 20               | 40         | 22.2 | 28               | 32.9        | 16.7             | <b>&lt;0.0001</b> |
| Starvation | 10  | D42  | 10.1 | ♂   | 6                | 41  | 20.0 | 28               | 40   | 16.9 | 20               | 40         | 24.4 | 32               | 22.0        | 14.3             | <b>&lt;0.0001</b> |
| Starvation | 10  | D42  | 3.1  | ♀   | 1                | 37  | 32.7 | 46               | 35   | 37.7 | 50               | 40         | 37.9 | 58               | 0.6         | 16.0             | <b>0.0082</b>     |
| Starvation | 10  | D42  | 3.1  | ♀   | 2                | 39  | 22.8 | 28               | 40   | 25.1 | 32               | 38         | 22.5 | 28               | -1.1        | 0.0              | <b>0.0008</b>     |
| Starvation | 10  | D42  | 3.1  | ♀   | 3                | 40  | 26.2 | 32               | 40   | 29.4 | 36               | 39         | 24.4 | 28               | -6.8        | -12.5            | <b>0.0323</b>     |
| Starvation | 10  | D42  | 3.1  | ♀   | 4                | 40  | 25.8 | 32               | 40   | 29.8 | 36               | 40         | 28.1 | 32               | 0.0         | 0.0              |                   |
| Starvation | 10  | D42  | 3.1  | ♂   | 1                | 40  | 18.6 | 26               | 40   | 18.3 | 26               | 40         | 21.1 | 30               | 13.7        | 15.4             | <b>0.0003</b>     |
| Starvation | 10  | D42  | 3.1  | ♂   | 2                | 40  | 16.5 | 20               | 40   | 17.4 | 20               | 40         | 15.4 | 16               | -6.5        | -20.0            | <b>0.0028</b>     |
| Starvation | 10  | D42  | 3.1  | ♂   | 3                | 40  | 16.9 | 20               | 39   | 15.7 | 20               | 40         | 16.3 | 20               | 0.0         | 0.0              |                   |
| Starvation | 10  | D42  | 3.1  | ♂   | 4                | 40  | 16.0 | 20               | 40   | 16.9 | 20               | 40         | 18.2 | 20               | 7.9         | 0.0              | 0.0572            |
| Starvation | 10  | D42  | 4.4  | ♀   | 1                | 40  | 29.8 | 35               | 40   | 24.3 | 35               | 40         | 19.9 | 25               | -18.0       | -28.6            | <b>&lt;0.0001</b> |
| Starvation | 10  | D42  | 4.4  | ♀   | 2                | 40  | 30.5 | 40               | 40   | 36.1 | 40               | 40         | 25.4 | 27               | -16.8       | -32.5            | <b>0.0006</b>     |
| Starvation | 10  | D42  | 4.4  | ♀   | 3                | 36  | 53.6 | 59               | 39   | 51.3 | 72               | 40         | 55.5 | 72               | 3.5         | 0.0              | 0.0973            |
| Starvation | 10  | D42  | 4.4  | ♀   | 4                | 40  | 26.5 | 32               | 40   | 25.1 | 32               | 40         | 24.8 | 32               | -1.3        | 0.0              | 0.0686            |
| Starvation | 10  | D42  | 4.4  | ♀   | 5                | 41  | 32.9 | 40               | 40   | 28.9 | 40               | 39         | 23.7 | 40               | -18.2       | 0.0              | <b>&lt;0.0001</b> |
| Starvation | 10  | D42  | 4.4  | ♀   | 6                | 40  | 28.5 | 36               | 40   | 29.4 | 36               | 40         | 27.8 | 32               | -2.5        | -11.1            | <b>0.0206</b>     |
| Starvation | 10  | D42  | 4.4  | ♀   | 7                | 40  | 31.2 | 40               | 40   | 29.8 | 36               | 30         | 28.9 | 32               | -2.9        | -11.1            | <b>0.0065</b>     |
| Starvation | 10  | D42  | 4.4  | ♂   | 1                | 40  | 19.5 | 25               | 40   | 19.9 | 25               | 40         | 19.8 | 25               | 0.0         | 0.0              |                   |
| Starvation | 10  | D42  | 4.4  | ♂   | 2                | 40  | 11.6 | 15               | 40   | 10.6 | 15               | 40         | 10.0 | 10               | -5.9        | -33.3            | <b>0.0217</b>     |
| Starvation | 10  | D42  | 4.4  | ♂   | 3                | 37  | 27.2 | 34               | 36   | 25.5 | 34               | 39         | 27.8 | 34               | 2.3         | 0.0              | 0.0617            |
| Starvation | 10  | D42  | 4.4  | ♂   | 4                | 40  | 14.5 | 16               | 40   | 17.4 | 20               | 40         | 15.3 | 20               | 0.0         | 0.0              |                   |
| Starvation | 10  | D42  | 4.4  | ♂   | 5                | 40  | 12.4 | 15               | 40   | 11.9 | 21               | 39         | 10.9 | 15               | -8.6        | 0.0              | <b>0.0082</b>     |
| Starvation | 10  | D42  | 4.4  | ♂   | 6                | 40  | 14.6 | 16               | 39   | 15.7 | 20               | 41         | 16.1 | 20               | 2.6         | 0.0              | <b>0.0007</b>     |
| Starvation | 10  | D42  | 4.4  | ♂   | 7                | 40  | 15.7 | 16               | 40   | 16.9 | 20               | 40         | 16.4 | 20               | 0.0         | 0.0              |                   |

**Table S2: Stress resistance data and analysis of Hsp70 overexpression.** Mean: average survival in hours, n: number of flies in the replicate, P: highest Log-rank test value, 1: replicate number, 2: 95% mortality (maximum lifespan)
