# Supplementary material
Source: publisher figshare collection journal article supplement (https://gsajournals.figshare.com/articles/dataset/_/9916223)
Supplement: Supplementary file [file 1]

| Data type                           | Experimental species   | Symbol/name used in publication | Source – public                     | Source – published | Source – unpublished | Identifiers         | New reagent                      | Comments |
|-------------------------------------|------------------------|---------------------------------|-------------------------------------|--------------------|----------------------|---------------------|----------------------------------|----------|
| gene (source not applicable)        | <i>D. melanogaster</i> | hsp70                           | NA                                  | NA                 | NA                   | Flybase:FBgn0286924 |                                  |          |
| genetic reagent (in whole organism) | <i>D. melanogaster</i> | da-GAL4                         | Bloomington Drosophila Stock Center | PMID:7606787       |                      | BDSC:55851          |                                  |          |
| genetic reagent (in whole organism) | <i>D. melanogaster</i> | D42                             | Bloomington Drosophila Stock Center | PMID:7624365       |                      | BDSC:8816           |                                  |          |
| genetic reagent (in whole organism) | <i>D. melanogaster</i> | DJ694                           | Bloomington Drosophila Stock Center | PMID:12882353      |                      | BDSC:8176           |                                  |          |
| genetic reagent (in whole organism) | <i>D. melanogaster</i> | UAS-lacZ                        | Bloomington Drosophila Stock Center |                    |                      | BDSC:1777           |                                  |          |
| genetic reagent (in whole organism) | <i>D. melanogaster</i> | UAS-hsp70 #2.1                  | Bloomington Drosophila Stock Center | PMID:17443800      |                      |                     |                                  |          |
| genetic reagent (in whole organism) | <i>D. melanogaster</i> | UAS-hsp70 #3.1                  | Bloomington Drosophila Stock Center | PMID:17443800      |                      |                     |                                  |          |
| genetic reagent (in whole organism) | <i>D. melanogaster</i> | UAS-hsp70 #3.2                  | Bloomington Drosophila Stock Center | PMID:17443800      |                      |                     |                                  |          |
| genetic reagent (in whole organism) | <i>D. melanogaster</i> | UAS-hsp70 #4.3                  | Bloomington Drosophila Stock Center | PMID:17443800      |                      |                     |                                  |          |
| genetic reagent (in whole organism) | <i>D. melanogaster</i> | UAS-hsp70 #4.4                  | Bloomington Drosophila Stock Center | PMID:17443800      |                      |                     |                                  |          |
| genetic reagent (in whole organism) | <i>D. melanogaster</i> | UAS-hsp70 #9.1                  | Bloomington Drosophila Stock Center | PMID:17443800      |                      |                     |                                  |          |
| genetic reagent (in whole organism) | <i>D. melanogaster</i> | UAS-hsp70 #10.1                 | Bloomington Drosophila Stock Center | PMID:17443800      |                      |                     |                                  |          |
| genetic reagent (in whole organism) | <i>D. melanogaster</i> | UAS-hsp70-RNAi R1.17            |                                     | this paper         |                      |                     | pCX9 3rd chromosome transformant |          |
| genetic reagent (in whole organism) | <i>D. melanogaster</i> | UAS-hsp70-RNAi R1.26            |                                     | this paper         |                      |                     | pCX9 2nd chromosome transformant |          |
| genetic reagent (in whole organism) | <i>D. melanogaster</i> | UAS-hsp70-RNAi R2.17            |                                     | this paper         |                      |                     | pCX9 3rd chromosome transformant |          |
| genetic reagent (in whole organism) | <i>D. melanogaster</i> | UAS-hsp70-RNAi R3.12            |                                     | this paper         |                      |                     | pCX9 X chromosome transformant   |          |
| genetic reagent (in whole organism) | <i>D. melanogaster</i> | UAS-hsp70-RNAi R4.15            |                                     | this paper         |                      |                     | pCX9 3rd chromosome transformant |          |
| genetic reagent (in whole organism) | <i>D. melanogaster</i> | UAS-hsp70-RNAi R5.2             |                                     | this paper         |                      |                     | pCX9 3rd chromosome transformant |          |
| genetic reagent (in whole organism) | <i>D. melanogaster</i> | UAS-hsp70-RNAi R5.12            |                                     | this paper         |                      |                     | pCX9 2nd chromosome transformant |          |
| genetic reagent (in whole organism) | <i>D. melanogaster</i> | UAS-hsp70-RNAi R5.12e           |                                     | this paper         |                      |                     | pCX9 3rd chromosome transformant |          |
| genetic reagent (in whole organism) | <i>D. melanogaster</i> | UAS-hsp70-RNAi R5.14            |                                     | this paper         |                      |                     | pCX9 3rd chromosome transformant |          |
| antibody                            | <i>M. musculus</i>     | myc 9E10                        | Roche                               |                    |                      | 11667203001         |                                  |          |
| antibody                            | <i>M. musculus</i>     | hsp70 5A5                       | ThermoFisher Scientific             |                    |                      | MA3-007             |                                  |          |
| antibody                            | <i>M. musculus</i>     | a-Tubulin DM1A                  | Abcam                               |                    |                      | Ab7291              |                                  |          |
| antibody                            | <i>C. hircus</i>       | anti-mouse HRP                  | Bio-Rad                             |                    |                      | 170-6516            |                                  |          |
| recombinant DNA reagent             | <i>E. coli</i>         | pCX1 (pINDY5-hsp70)             |                                     | PMID:17443800      |                      |                     |                                  |          |
| recombinant DNA reagent             | <i>E. coli</i>         | Sym-pUASTw                      |                                     | PMID:11861567      |                      |                     |                                  |          |
| recombinant DNA reagent             | <i>E. coli</i>         | pCX9.1                          |                                     | this paper         |                      |                     | Progenitors: pCX1; Sym-pUASTw    |          |
| recombinant DNA reagent             | <i>E. coli</i>         | pCX9                            |                                     | this paper         |                      |                     | Progenitors: pCX9.1              |          |
